# Supplementary material for: How many species in the United States warrant consideration for Endangered Species Act protection?
Source: PeerJ. 2026 Jan 27;14:e20692. doi: 10.7717/peerj.20692 (PMC12857552; doi:10.7717/peerj.20692)
Supplement: Supplemental Information 2 [file peerj-14-20692-s002.xlsx]

## Sheet: Sheet1
ELEMENT_GLOBAL_ID	GNAME	G_PRIMARY_COMMON_NAME	INFORMAL_TAX	G_RANK	ROUNDED_G_RANK	G_RANK_CHANGE_DATE	G_RANK_REVIEW_DATE	NATION_US	US_N_RANK	US_ROUNDED_N_RANK	US_N_RANK_REVIEW_DATE	STATE_PROV_SRANK	NUMBER_EOS	G_NUMBER_EOS_COM	POP_SIZE	G_POP_SIZE_COM	LONG_TERM_TREND	G_LONG_TERM_TREND_COM	SHORT_TERM_TREND	G_SHORT_TERM_TREND_COM	G_THREAT_COM	IUCN_THREAT_CATEGORY_DESC	G_RANK_REASONS	USESA	G_INTERPRETED_USESA	IUCN_RED_LIST_CATEGORY	AFS_STATUS	Habitat Destruction	Over-utilization	Disease or Predation	Inadequacy of Existing Regulations	Small Population Size	Invasive Species	Altered Disturbance Regime	Climate Change	May Warrant	Petition	Positive90-Dayor12Month	Negative90-Dayor12Month	Comments	Reviewed	OtherFactors	Reviewer
100006	Blarina shermani	Sherman's Short-tailed Shrew	Mammals	G1	G1	2009-09-01	2009-09-01	US	N1	N1	2007-06-26	FL (S1)	A = 1 - 5	This taxon is represented by just one or two known occurrences (Benedict et al. 2006).		No data.				No information.	Habitat destruction/degradation likely to extirpate occurrences, which may have occurred already at the type locality.		Known from only one or two localities in Florida; not seen at the type locality since originally described in 1955; may occur at undiscovered sites in southwestern Florida but could be extinct.					1	0	0	0	0	0	0	0	1	1	1	0	Received a positive 90-day finding, currently under review.	1	0	Noah Greewald
100083	Diadophis punctatus acricus	Key Ringneck Snake	Reptiles	G5T1	T1	1996-10-29	2014-02-24	US	N1	N1	1996-10-05	FL (S1)	A = 1 - 5	Known from four lower Keys, but potentially occurs on a few more.	U = Unknown	No population estimates available.	E = Decline of 30-50%	Presumed to have declined in association with habitat destruction on private lands.	FG = Decline of <30% to relatively stable	Presumed to be declining in association with habitat destruction on private lands, though much of range is protected (public conservation lands).	Real estate development on private lands is the major current threat to this snake. Tolerates some habitat disturbance; human debris may be used for cover. Major long-term threat may be loss of habitat resulting from sea level rise that is projected to accompany global warming; managers of conservation lands here can do little to mitigate this.		Very small range in extreme southern Florida; known from only four keys in a region where habitat destruction is occuring at a rapid pace on remaining private lands; no occurrence is fully protected.					1	0	0	0	1	1	0	1	1	0	0	0		1	0	Will Harlan
100173	Plethodon vandykei	Van Dyke's Salamander	Amphibians	G2G3	G2	2022-07-20	2022-07-20	US	N3	N3	1996-11-05	WA (S3)	D = 81 - 300	418 locality records (Olson and Crisafulli 2014), but it is not clear how these may translate to occurrences. Some of the locality records are in close proximity to each other, suggesting the number of unique sites may be lower. These locality records are spread across all three regions (Willapa Hills, South Cascades, Olympic Peninsula). They are distributed across 81 6th-field watersheds (Olson …	EF = 2500 - 100,000 individuals	Total adult population size is unknown but likely exceeds several thousand. Generally uncommon.	E = Decline of 30-50%	Populations have probably declined in the last 200 years (Wilson et al. 1995).	U = Unknown	Little is known about population trends in this species, and long term population studies have not been conducted. In 1997, John Fleckenstein suggested populations were roughly stable.	The primary threats to this species include activities that alter habitat, microhabitat, and microclimate conditions (Olson and Crisafulli 2014). The most significant threats are timber harvest (particularly clear cutting) and climate change (Case 2014, Olson and Crisafulli 2014, Washington Department of Fish and Wildlife 2022). Timber harvest damages microhabitat and can alter moisture regimes (…	3 - Energy production & mining; 3.2 - Mining & quarrying; 4 - Transportation & service corridors; 4.1 - Roads & railroads; 5 - Biological resource use; 5.3 - Logging & wood harvesting; 6 - Human intrusions & disturbance; 6.1 - Recreational activities; 7 - Natural system modifications; 7.1 - Fire & fire suppression; 7.1.1 - Increase in fire frequency/intensity; 8 - Invasive & other problematic spe…	Fewer than 100 isolated populations occur in three regions in Washington; populations are generally small and isolated, fewer than 25% are believed to have high viability. Populations are believed to be roughly stable, but surveys are lacking. This species is threatened by timber management practices, road building, and climate change.			LC		1	0	0	0	0	0	0	1	1	0	0	0		1	0	Noah Greewald
100184	Etheostoma raneyi	Yazoo Darter	Freshwater and Anadromous Fishes	G2	G2	1996-09-24	2012-01-18	US	N2	N2	1996-12-05	MS (S2)	B = 6 - 20	If each tributary were regarded as a separate occurrence (subpopulation) there would be about 15 occurrences (based on the map in Suttkus et al. 1994); perhaps some of these should be combined, but the total number probably is between 6 and 20. See also the map in Ross (2001).	U = Unknown	Total adult population size is unknown. This is the most abundant fish in Morris Creek in Lafayette County (Johnston and Haag 1996). This species is sometimes locally abundant (Ross 2001).			FG = Decline of <30% to relatively stable	Trend over the past 10 years or three generations is uncertain but probably relatively stable or slowly declining.	This species is threatened primarily by habitat destruction and fragmentation from urban development (Sterling and Warren 2020, Ross 2001). Stream channelization, removal of bank vegetation, and factors that result in elevated water temperatures are detrimental (Suttkus et al. 1994).	2 - Agriculture & aquaculture; 7 - Natural system modifications; 7.2 - Dams & water management/use	Small range in the Yazoo River drainage, Mississippi; probably fewer than 20 subpopulations; population size and trend are unknown; habitat is easily damaged.				Vulnerable	1	0	0	0	0	0	0	1	1	0	0	0	Recent update: Genetic and morphological analyses by Sterling and Warren (2020) and Sterling et al. (2020) determined that the Yazoo Darters in the Yocona River drainage are genetically distinct and are now recognized as a distinct species, Etheostoma faulkneri. E. raneyi is now restricted to the Little Tallahatchie River drainage.	1	0	Will Harlan
100317	Siphateles bicolor ssp. 12	Eagle Lake Tui Chub	Freshwater and Anadromous Fishes	G4T1T2	T1	2014-09-09	2014-09-09	US	N1	N1	2009-01-15	CA (S1S2)	A = 1 - 5	Historically and presently only found in Eagle Lake.	FH = 10,000 to >1,000,000 individuals	Currently the most abundant fish in the lake and supports large numbers of fish-eating birds. Numbers > 100,000 during normal years.					If lake level rises (BLM and CDF&G recently blocked off a drainage tunnel) the lake will become less alkaline and the threat of exotic introductions will increase (many non-native species are unable to survive the presently alkaline conditons), as will the possibility of disease, competition, parasites, and predation (Moyle et al. 1989).		Restricted to Eagle Lake, northern California; increasing the water level could pose a threat.					1	0	1	0	0	1	0	0	1	0	0	0		1	0	Krista Kemppinen
100781	Pararhinichthys bowersi	Cheat Minnow	Freshwater and Anadromous Fishes	G1G2Q	G1	1999-03-31	2007-05-25	US	N1N2	N1	1996-12-05	MD (SX), PA (S1), WV (S1S2)	B = 6 - 20	Reported from about a dozen streams, but not found in several of these during surveys in 1980s.	U = Unknown	Always found in extremely small numbers; known from most streams from one to ten individuals; extensive collecting in range has yielded about 70 specimens since 1890.	D = Decline of 50-70%	Area of occupancy, number of subpopulations, and abundance have declined substantially, although the level of decline is not precisely known.	U = Unknown		Species occurs in an area of severe stream acidification due to acid mine runoff; may be threatened by acid rain, flood-control dams.		Known from about a dozen streams in Pennsylvania, West Virginia, and Maryland, but populations are very small and not confirmed in several streams recently; habitat is at risk from acid-mine runoff; status as a valid species is doubtful--apparently an F1 hybrid.					1	0	0	1	1	0	0	1	1	0	1	0		1	0	Will Harlan
100114	Cyprinodon nevadensis amargosae	Amargosa Pupfish	Freshwater and Anadromous Fishes	G2T1T2	T1	2014-09-19	2014-09-19	US	N2	N2	2013-03-11	CA (S1S2)	A = 1 - 5	This subspecies is represented by only one or two occurrences within the native range.	D = 1000 - 2500 individuals		EG = Decline of <50% to Relatively Stable	Long-term trend is uncertain, but probably the distribution/abundance of this subspecies has declined to some degree over the long term.	U = Unknown	Trend over the past 10 years or three generation is uncertain. The overall population was regarded as stable in 1998 (see Moyle 2002).	The primary threat is potential dewatering of the Amargosa River (Moyle et al. 1995). Moyle et al. (1995) explained this threat as follows. The river apparently receives much of its permanent flow from springs fed by a large, ancient aquifer that extends into western Utah and central Nevada. As of the mid-1990s, farming operations and human settlements in the Amargosa region were withdrawing incr…	7 - Natural system modifications; 7.2 - Dams & water management/use; 8 - Invasive & other problematic species, genes & diseases; 8.1 - Invasive non-native/alien species/diseases; 11 - Climate change & severe weather; 11.2 - Droughts	Limited range in Amargosa River system, California; susceptible to water flow reductions and introduction of exotic species.				Vulnerable	1	0	0	0	0	1	0	1	1	0	0	0	Other factors: protection from floods	1	1	Krista Kemppinen
100265	Neotamias quadrivittatus australis	Organ Mountains Chipmunk	Mammals	G5T1	T1	1994-12-02	2017-12-04	US	N1	N1	1997-01-15	NM (S1)	A = 1 - 5			No population estimate or census has been conducted.			U = Unknown	Given available data, it is not possible to assess population trend.	The main threats to this subspecies are its limited mountaintop range and small population size. The piñon-juniper woodlands in which this species occurs have been impacted by drought and disease (Gaylord et al. 2013, Meddens et al. 2015). The subspecies’ mountaintop isolation severely limits its ability to disperse when climate change or other factors impact its habitat.	5 - Biological resource use; 5.3 - Logging & wood harvesting; 6 - Human intrusions & disturbance; 6.2 - War, civil unrest & military exercises; 7 - Natural system modifications; 7.1 - Fire & fire suppression; 8 - Invasive & other problematic species, genes & diseases; 11 - Climate change & severe weather	Known from one small mountain range in New Mexico and the piñon-juniper habitat in which it occurs is experiencing the effects of drought.			VU - Vulnerable		0	0	1	0	1	0	0	1	1	0	0	0	Other factors: drought.	1	1	Krista Kemppinen
100379	Dipodomys merriami collinus	Earthquake Merriam's Kangaroo Rat	Mammals	G5T2?	T2	2017-12-08	2017-12-08	US	N1N2	N1	2017-12-08	CA (S1S2)	U = Unknown		U = Unknown		U = Unknown	Likely widespread decline with the extensive habitat loss and fragmentation within range.	U = Unknown	Likely continued declined with continued habitat loss.	Habitat loss and fragmentation extensive throughout range; sand mining, agricultural activities, grazing, and off-road vehicles also threats (Hafner et al. 1998, Pendrod et al 2006). May be threatened by increased aridity, droughts, and extreme events with climate change.	1 - Residential & commercial development; 2 - Agriculture & aquaculture; 3 - Energy production & mining; 3.2 - Mining & quarrying; 11 - Climate change & severe weather; 11.1 - Habitat shifting & alteration	Extensive habitat loss and fragmentation within highly restricted range in southern California. Threats include development, sand mining, agricultural activities, grazing, and off-road vehicles, and climate change.			DD - Data deficient		1	0	0	0	0	0	0	1	1	0	0	0	Other factors: increased aridity, droughts	1	1	Krista Kemppinen
100453	Urocitellus brunneus	Idaho Ground Squirrel	Mammals	G2	G2	1996-11-06	2006-04-28	US	N2	N2	1997-01-15	ID (S2)	C = 21 - 80	Based on locations mapped on a coarse scale (Yensen and Sherman 1997), this species occurs in at least few dozen distinct areas; these include at least a few hundred occupied sites. See information for subspecies brunneus and endemicus.	EF = 2500 - 100,000 individuals	Total adult population size appears to be at least several thousand individuals (Yensen 2001, USFWS 2002). See information for subspecies brunneus and endemicus.	DE = Decline of 30-70%	A significant decline has occurred in area of occupancy, number of subpopulations, and population size (USFWS 2002, 2004). See information for subspecies brunneus and endemicus.	G = Relatively Stable (<=10% change)	Current overall trend is uncertain but may be relatively stable. See information for subspecies brunneus and endemicus.	The major threat in the northern part of the range is loss and fragmentation of meadow habitat, primarily due to dense regrowth of conifers as a result of fire suppression and ecological succession following logging; but agricultural conversion, road construction, and residential and golf course development also destroy and fragment habitat (Sherman and Yensen 1994, USFWS 2000, USFWS 2002). Other…	1 - Residential & commercial development; 1.3 - Tourism & recreation areas; 2 - Agriculture & aquaculture; 2.1 - Annual & perennial non-timber crops; 2.3 - Livestock farming & ranching; 4 - Transportation & service corridors; 4.1 - Roads & railroads; 5 - Biological resource use; 5.1 - Hunting & collecting terrestrial animals; 7 - Natural system modifications; 7.3 - Other ecosystem modifications; …	Small range in west-central Idaho; adult population size includes several thousand adults; most populations are small; threatened primarily by habitat loss and fragmentation; ongoing conservation efforts are addressing threats.		LT	EN - Endangered		1	0	0	0	1	0	0	0	1	0	0	0	Northern Idaho ground squirrel ESA listed as threatened. Southern Idaho ground squirrel denied ESA listing in 2015 after being a candidate for 11 years. It will need to be considered again.	1	0	Noah Greewald
100557	Moxostoma robustum	Robust Redhorse	Freshwater and Anadromous Fishes	G1	G1	1998-07-31	2012-03-02	US	N1	N1	1997-09-14	GA (S1), NC (S1), SC (SNR)	A = 1 - 5	This species is represented by four extant native populations (see map in Hendricks 2002).	D = 1000 - 2500 individuals	Total adult population size is unknown but may not exceed 2,000. The largest known population occurs in the Oconee River between Dublin, Georgia, and Big Black Creek and is estimated to consist of 600 adults (Jennings et al. 2000).	AF = Decline of >10%	Compared to the historical situation (e.g., Cope 1870), all populations have declined in abundance (Menhinick and Braswell 1997, Straight and Freeman 2003), though the degree of decline is not precisely known.	FG = Decline of <30% to relatively stable	The largest known population, in the Oconee River, exhibits some evidence of recent juvenile recruitment to the population, though the population is skewed toward older age classes (Straight and Freeman 2003). There are still many unknowns about the Oconee River population but, overall, it appears stable (Hendricks 2002). Current trend in other populations is uncertain.	Declines are attributed to four factors: historical overfishing (probably not a major factor), deforestation and sedimentation (e.g., as a result of agricultural activities), the damming of virtually all rivers within the historical range, and the introduction of nonindigenous, predatory fish species. Currently, the small range and presumed small population size are major threats to the species. …	7 - Natural system modifications; 7.2 - Dams & water management/use; 8 - Invasive & other problematic species, genes & diseases; 8.1 - Invasive non-native/alien species/diseases; 9 - Pollution; 9.3 - Agricultural & forestry effluents	Small range and area of occupancy in the Altamaha, Savannah, and Pee Dee river systems in Georgia, South Carolina, and North Carolina; large decline in abundance primarily due to historical overfishing, habitat loss and degradation from agricultural activities and the damming of virtually all rivers within the historical range, and the introduction of nonindigenous, predatory fish species; small …			EN - Endangered	Endangered	1	0	1	0	1	1	1	0	1	1	1	0	Under Review and positive 90 day finding in 2011 --Maria Papadopoulos / already has CCA - Robust Redhorse Conservation Committee includes major state and federal agencies and Duke Energy, Georgia Wildlife Federation, Georgia Power	1	0	Will Harlan
100564	Catostomus sp. 1	Wall Canyon Sucker	Freshwater and Anadromous Fishes	G1	G1	1996-09-19	1996-09-19	US	N1	N1	1996-12-05	NV (S1)	A = 1 - 5	One known EO.							Stream banks and riparian vegetation are subject to damage from overgrazing.		Known from only one stream in northwestern Nevada; ownership is BLM and private; habitat degradation through riparian overgrazing is a potential threat.				Endangered	1	0	0	0	0	0	0	0	1	0	0	0		1	0	Krista Kemppinen
100568	Fundulus bifax	Stippled Studfish	Freshwater and Anadromous Fishes	G2G3	G2	1996-09-20	2012-01-27	US	N2N3	N2	1996-12-05	AL (S2), GA (S1)	B = 6 - 20	Mettee et al. (1996) and Boschung and Mayden mapped 20-21 collection sites representing perhaps 12-15 distinct occurrences (subpopulations).	U = Unknown	Total adult population size is unknown. Page and Burr (2011) described this species as locally common, whereas Boschung and Mayden (2004) stated that the species is "uncommon in many areas" and "its numbers are usually few at any given site."	U = Unknown		FG = Decline of <30% to relatively stable	Trend over the past 10 years or three generations is uncertain but probably relatively stable or slowly declining.	Impoundments and degradation of water quality in streams presumably pose some level of threat.	1 - Residential & commercial development; 1.1 - Housing & urban areas; 7 - Natural system modifications; 7.2 - Dams & water management/use; 9 - Pollution	Small range in the Tallapoosa River system, Alabama and Georgia, and the lower Coosa River system, Alabama; generally uncommon and poorly known.			NT - Near threatened	Vulnerable	1	0	0	0	0	0	0	0	1	1	0	0		1	0	Will Harlan
100610	Siphateles bicolor isolata	Independence Valley Tui Chub	Fishes - Freshwater and Anadromous Bony, Cartilagi	G4T1Q	T1	2000-03-24	2021-08-06	US	N1	N1	1996-09-05	NV (S1)	A = 1 - 5	The entire known population is confined to one occurrence in a single spring system and marsh.	U = Unknown		AE = Decline of >30%	Although the long-term trend has not been quantified, several subpopulations of the species have become extirpated such that at one point it was thought to be extinct.	F = Decline of 10-30%	Trend data from the U.S. Geological Survey study from 2006-2008 shows a decreasing trend in the population (Johnson et al. 2009).	Thought to be extinct in the 1980s, this species was found to persist in a limited number of spring outflows in the early 1990s. It is threatened by introduced aquatic taxa (centrarchid fish, bullfrogs) (Rissler et al 2001). Grazing management adjacent to the springs may also be problematic. Mining operations and nearby mining exploration activities could impact the aquifer that supports the spri…	2 - Agriculture & aquaculture; 2.3 - Livestock farming & ranching; 3 - Energy production & mining; 3.2 - Mining & quarrying; 8 - Invasive & other problematic species, genes & diseases; 8.1 - Invasive non-native/alien species/diseases	This species has undergone a long- and short-term decline, persists in a small occupied area, and has several ongoing threats.				Endangered	1	0	0	0	1	1	0	0	1	0	0	0		0	0	Krista Kemppinen
100638	Dendragapus fuliginosus howardi	Mount Pinos Sooty Grouse	Birds	G5T2T3	T2	2014-04-23	2014-04-23	US	N2N3	N2	2013-08-09	CA (S2S3)	BC = 6 - 80	The number of relatively distinct occurrences (subpopulations) has not been determined using standardized criteria, but probably there are at least several (possibly fewer than 21) but not more than several dozen.		Total adult population size is unknown but relatively small. This subspecies is most common in the northern portion of its range and becomes increasingly rare toward the southern limit of contiguous forest in the southern Sierra Nevada (Grinnell and Miller 1944, Bland 2008). On the east slope of the Sierra Nevada, in Inyo County, the subspecies is "common" north of the town of Bishop (T. Heindel,…	EF = Decline of 10-50%	Historically these grouse were scarce in the montane "islands" of southern California; today they are very scarce or absent (Bland 2008).Bland conducted surveys in all accessible habitat patches south of Tulare County during the breeding seasons of 2002 through 2005. More than 200 km of transects were covered, primarily on foot, and recorded female vocalizations were employed. No hooting males we…			Principal threats probably are habitat degradation caused by incompatible timber harvest, fire suppression, and livestock grazing practices (Bland 2008). Timber harvest that results in even-aged stands or evenly distributed trees may be detrimental, as may be selective harvest of large, clumped conifers at the perimeter of forest open(Bland 2008). Fire suppression may result in fir stands that ar…	1 - Residential & commercial development; 2 - Agriculture & aquaculture; 2.3 - Livestock farming & ranching; 6 - Human intrusions & disturbance; 6.1 - Recreational activities; 7 - Natural system modifications; 7.1 - Fire & fire suppression; 11 - Climate change & severe weather; 11.1 - Habitat shifting & alteration	Small range in the southern Sierra Nevada and isolated montane habitats to the south in southern California; apparently extirpated in the southern portion of the range; threats include incompatible timber harvest, fire suppression, livestock grazing practices, land development, recreational use of habitat, and climate change; current rank reflects the traditional scope of this taxon, but further …					1	0	0	0	0	0	0	1	1	0	0	0	Other factors: fire suppression	1	1	Krista Kemppinen
100669	Hesperoleucus symmetricus navarroensis	Navarro Roach	Freshwater and Anadromous Fishes	G4T1T2	T1	2003-07-28	2006-01-03	US	N1N2	N1	2003-07-28	CA (S2S3)	A = 1 - 5	The Navarro River, where this fish has been found in many locations, could be regarded as one occurrence or as perhaps up to several.	D = 1000 - 2500 individuals	Abundant throughout range (Moyle et al. 1989, Moyle 2002).			G = Relatively Stable (<=10% change)	Remains abundant in the Navarro River (Moyle 2002).	Moyle (2002) stated that this fish may have benefited from opening of the canopy and warming of the water as the result of logging and agriculture. However, diversion of both surface water and ground water has caused drying up of the river in some sections and elimination of roach.		Small range in Russian and Navarro rivers and their tributaries in northern California; range is shrinking as tributary streams are diverted or altered as a result of logging and other factors.					1	0	0	0	1	0	0	0	1	0	0	0		1	0	Krista Kemppinen
100686	Puffinus opisthomelas	Black-vented Shearwater	Birds	G2	G2	2000-10-26	2002-04-25	US	NNRN	NNRN	2003-10-03	AZ (SNA), CA (SNRN), OR (SNA), BC (SNA)	A = 1 - 5	Known to breed at three locations: 95% of known breeding individuals nest on Natividad I.; the remaining 5% breed on San Benito Is., and Afuera and Negro Islets off Guadalupe I (Keitt et al. 2000). Other small colonies may exist (Keitt et al. 2000).	G = 100,000 - 1,000,000 individuals	The 1997 estimate for Natividad I. was 76,570 pairs +/- 18,411 SD (Keitt 1998); about 1000 to 3000 pairs probably nest on San Benito Is. and in the Guadalupe I. area (Jehl and Everett 1985, Everett and Pitman 1993, Keitt et al. 2000). Briggs et al. (1987) estimated that 20,000 to 30,000 moved into California waters each year.	BD = Decline of 50-90%	Enormous flocks reported in 1890s are no longer seen (Everett 1988).	E = Decline of 30-50%	Breeding population thought to be decreasing. Cats have a considerable impact on breeding birds of Natividad Island; Keitt (1998) estimated mortality of about 1000 birds per month as a result of cat predation there. Population models predict a 4% annual decline at this rate (Keitt 1998). However, conservation actions are underway and any future declines are likely to be less severe (IUCN 2000).	In the early 1900s, hunting had a major impact on Natividad Island colony. Collisions with lighted objects on Natividad Island may cause significant mortality. All breeding islands have permanent human inhabitants, and the town of Natividad and its surrounding development has led to the loss of an estimated 26,532 nesting burrows, or 15% of the former total (Keitt 1998). Feral cats are a major so…	1 - Residential & commercial development; 1.1 - Housing & urban areas; 4 - Transportation & service corridors; 4.1 - Roads & railroads; 5 - Biological resource use; 5.4 - Fishing & harvesting aquatic resources; 8 - Invasive & other problematic species, genes & diseases; 8.1 - Invasive non-native/alien species/diseases; 9 - Pollution; 9.6 - Excess energy	Breeding restricted to a handful of small islands on the Pacific coast of Baja California; 95% of breeding population on one island. Population on the order of 80,000 pairs, but believed to be declining. Threatened by development on nesting islands (primary nesting island has a growing town within the colony) and by introduced mammals, especially cats. Cat eradication program underway.			NT - Near threatened		1	1	1	0	0	1	0	0	1	0	0	0		1	0	Noah Greewald
100690	Microtus californicus stephensi	Stephens' California Vole	Mammals	G5T2T3	T2	2018-12-03	2018-12-03	US	N1N2	N1	2001-06-01	CA (S2)	B = 6 - 20	Known from only a few occurrences, most of which were specimens collected in the mid-late 1900s.	DE = 1000 - 10,000 individuals		U = Unknown	Population size unknown, but is suspected to be decreasing or to have experienced significant historical decline.	G = Relatively Stable (<=10% change)	Current population is suspected to be stable, although it is has likely experienced historical decline.	Limited habitat due to development and degradation is primary threat.	1 - Residential & commercial development; 11 - Climate change & severe weather	Limited information on population size or dynamics, but extensive development has likely led to population isolation and extensive habitat degradation.					1	0	0	0	0	0	0	1	1	0	0	0		1	0	Jeff Miller
100784	Sceloporus woodi	Florida Scrub Lizard	Reptiles	G2G3	G2	2014-03-05	2014-03-05	US	N3	N3	1996-10-05	FL (S2S3)	CD = 21 - 300	This species occurs in numerous scrubs throughout the range (> 200 localities), although number of occupied sites has declined in recent decades, especially on both coastal ridges. The precise number of distinct, extant occurrences is not known. On a small-scale map, Lee and Funderberg (1977) indicated several dozen collection sites. Krysko et al. (2011) depict the locations of more than 2000 vou…	FG = 10,000 - 1,000,000 individuals	Total adult population size is unknown but likely exceeds 10,000. Population densities vary from 10 to 120 per hectare. The species is still common on the Lake Wales Ridge and in the Ocala National Forest.	DE = Decline of 30-70%	This species historically was far more widespread and numerous. Populations on the ridges on both southeastern and southwestern coasts have declined substantially, prinicipally in association with development-related habitat losses (Bartlett and Bartlett 1999).	F = Decline of 10-30%	Area of occupancy, number of subpopulations, and population size are undoubtedly declining as scrub habitat is converted for agriculture and commercial/residential/golf course development. The rate of decline is uncertain but probably does not exceed 30% over the past 10 years or three generations.	The species' high sandy habitats are subject to destruction by agriculture (especially citrus), urbanization, forestry, and mining. In some areas, these habitats are naturally fragmented, and scrub lizards appear to have limited dispersal capabilities due to high habitat specificity and low mobility, but genetic data indicate that some populations have existed in isolation for more than 1 million…	1 - Residential & commercial development; 1.1 - Housing & urban areas; 1.2 - Commercial & industrial areas; 1.3 - Tourism & recreation areas; 2 - Agriculture & aquaculture; 2.1 - Annual & perennial non-timber crops; 3 - Energy production & mining; 3.2 - Mining & quarrying; 5 - Biological resource use; 5.3 - Logging & wood harvesting	The species has a restricted range in peninsular Florida and depends upon highly threatened xeric upland habitats. Its scrub habitats are steadily being lost to agriculture, urbanization, silviculture, and mining; this has resulted in local population declines and extirpations. If the evolutionarily significant units noted by Clark et al. (1999) are described in the future as species, all Global …			NT - Near threatened		1	0	0	0	0	0	0	0	1	1	1	0	under review, already petitioned, positive 90 day finding in 2016 --Maria Papadopoulos	1	0	Will Harlan
100792	Oncorhynchus mykiss pop. 36	Steelhead - Summer Runs Population	Fishes - Freshwater and Anadromous Bony, Cartilagi	G5T2Q	T2	2022-12-31	2022-12-31	US	N4	N4	2001-06-21	CA (S2)	B = 6 - 20	The summer-run steelhead DPS consists of 10 independent populations within a geographic subset of the Northern California steelhead DPS (NMFS 2016a).	C = 250 - 1000 individuals		D = Decline of 50-70%	The long-term trend of the summer run steelhead DPS reflects decline. Populations comprising the summer run steelhead DPS are small, isolated, and likely in long-term decline (CDFW 2019, NMFS 2016a).	F = Decline of 10-30%	The short-term trend of the North Coast steelhead DPS is likely declining, Most northern California steelhead DPS populations are between 5% and 13% of recovery criteria levels (NMFS 2016b) because of on-going threats.	As urban and suburban development continues, and the impacts associated with these developments (habitat loss and fragmentation, pollutant load, timing and availability of water) have likely increased in recent years. Timber harvest is the dominant land use in watersheds within the summer-run steelhead DPS range. Stream protections and other measures designed to improve conditions for salmonids h…	1 - Residential & commercial development; 1.1 - Housing & urban areas; 5 - Biological resource use; 5.3 - Logging & wood harvesting; 7 - Natural system modifications; 7.2 - Dams & water management/use; 9 - Pollution; 9.6 - Excess energy; 9.6.2 - Thermal pollution	This DPS occupies a part of the north state subject to exceptionally impaired flows and extensive past timber harvest adjacent to streams and rivers. Some of these threats continue and populations of this DPS continue to decline.					1	0	0	0	1	0	0	1	1	0	0	0		1	0	Jeff Miller
100808	Iotichthys phlegethontis	Least Chub	Freshwater and Anadromous Fishes	G2	G2	2013-03-26	2013-03-26	US	N2	N2	2013-03-26	UT (S2)	A = 1 - 5	Naturally occurring populations are currently restricted to 6 populations in 4 general areas (Mock and Miller 2005). USFWS (2010) recognized five existing wild populations.	U = Unknown	Total adult population size is unknown. Individual populations are small.		Decline was first noted in the 1940s and 1950s, continued through at least the 1980s. Recent recovery efforts have resulted in an increasing trend in abundance and in the number of populations (Muck 1999). However, data from the 1990s suggested that least chub numbers may have been declining within the Gandy Salt Marsh (Perkins et al. 1998).	U = Unknown	Trend over the past 10 years or three generations is uncertain.	USFWS (2010) found that listing the least chub as threatened or endangered is warranted due to the effects of livestock grazing and water withdrawal and diversions on the species and its habitat. Although the agencies have worked to protect least chub habitat with grazing enclosures where possible and grazing management plans in some areas, livestock-grazing-related impacts are still observed at …	2 - Agriculture & aquaculture; 2.3 - Livestock farming & ranching; 7 - Natural system modifications; 7.2 - Dams & water management/use; 8 - Invasive & other problematic species, genes & diseases; 8.1 - Invasive non-native/alien species/diseases; 11 - Climate change & severe weather; 11.2 - Droughts	Native to the Bonneville Basin, Utah; adversely affected by introduced fishes (predation, competiton, hybridization); threats from habitat degradation and introduced species have been alleviated by a recent conservation agreement; increasing overall in range and abundance as a result of introductions, though some naturally occurring populations may be declining; potential dewatering of habitat as…			EN - Endangered	Endangered	1	0	1	1	1	1	0	1	1	1	0	0	Other factors: population isolation and stochastic disturbance such as drought, floods and fire. Climate change threat: specific.	1	1	Krista Kemppinen
100820	Sylvilagus robustus	Robust Cottontail	Mammals	G1G2	G1	2011-05-13	2011-05-13	US	N1N2	N1	2011-05-13	NM (S1), TX (S3)	AB = 1 - 20	An apparently healthy population exists in the Davis Mountains; other occurrneces (subpopulations) are extirpated, very rare, or of unknown status (Schmidly 2004).	U = Unknown	Adult population size is unknown. This species appears to occur in low densities (Ruedas 1998).	DE = Decline of 30-70%	The species has been severely reduced or extirpated in the Guadalupe Mountains and Chisos Mountains, where Schmidly (2004) reported no specimens collected or observed in the past 30 years (see also Ruedas 1998). Status of the Sierra de la Madera population is unknown (Ruedas 1998).	U = Unknown	Current trend is unknown.	Habitat destruction caused by urbanization, development, cattle grazing, and brush clearing are reducing available habitat (Schmidly 1977, Ruedas 1998). Climate change, particularly long-term drought, may be a threat (Ruedas 1998).	1 - Residential & commercial development; 1.1 - Housing & urban areas; 2 - Agriculture & aquaculture; 2.3 - Livestock farming & ranching; 11 - Climate change & severe weather; 11.2 - Droughts	This species has a small range in Texas, New Mexico, and adjacent Mexico. It has disappeared from two of the four mountain ranges from which it is known; current trend is unknown. Taxonomic status (species versus subspecies) is in need of further study.			EN - Endangered		1	0	1	0	1	0	0	1	1	0	0	0	Other factors: drought.	1	1	Krista Kemppinen
100857	Percina sp. 12	Ouachita Darter	Fishes - Freshwater and Anadromous Bony, Cartilagi	G2	G2	2023-04-13	2023-04-13	US	N2?	N2	1996-12-05	AR (S2)	A = 1 - 5	This species occurs in the Ouachita, Little Missouri, and Caddo rivers. In the Ouachita River, it occurs both above and below Lake Ouachita, constituting two separate occurrences, bringing the total to four occurrences.	U = Unknown	It is never abundant at any location; the densest populations are found in a 40 km stretch of the Ouachita River above the headwaters of the Lake Ouachita impoundment (Robison et al. 2014).	EF = Decline of 10-50%	Dams and other factors have led to declines and extirpations from portions of this species' range.	G = Relatively Stable (<=10% change)	Trend over the past three generations is uncertain but appears to be relatively stable, or at least not declining substantially (Robison and Buchanan 2020).	This species faces a variety of threats across its range, including pollution and sedimentation (Gagen et al. 2002), dams (Standage et al. 2014), and land use issues ranging from agriculture to forestry to clearing of riparian vegetation for housing and other purposes (Fowler and Anderson 2015). Three of the four occurrences are affected by dams; Lake Hamilton (1931), Lake Ouachita (1952) and DeG…	1 - Residential & commercial development; 1.1 - Housing & urban areas; 1.2 - Commercial & industrial areas; 2 - Agriculture & aquaculture; 2.1 - Annual & perennial non-timber crops; 5 - Biological resource use; 5.3 - Logging & wood harvesting; 7 - Natural system modifications; 7.2 - Dams & water management/use; 8 - Invasive & other problematic species, genes & diseases; 8.1 - Invasive non-native/…	This species has a small range and just four occurrences in the Ouachita and Little Missouri rivers, Arkansas. Population density is low at known locations and it has declined from historical abundance, in part due to construction of dams. It faces a variety of threats across its range, including pollution and sedimentation, dams, and land use issues ranging from agriculture to forestry to cleari…				Threatened	1	0	0	0	0	1	0	1	1	0	0	0		1	0	Will Harlan
100865	Dipodomys nitratoides	Short-nosed Kangaroo Rat	Mammals	G2	G2	2022-07-21	2022-07-21	US	N3	N3	1996-09-05	CA (SNR)	DE = 81 to >300	The number of occurrences of this species is unknown but likely exceeds 300.	U = Unknown	Total adult population size is unknown but appears to be at least a few 100,000s. Local population size tends to exhibit large fluctuations.Subspecies exilis: This subspecies is currently rare at best, with fluctuating populations. Remaining populations are of uncertain taxonomic status (USFWS 1998). Documented density ranges between 2 and 29 individuals per hectare (see USFWS 1998). Subspecies n…	A = Decline of >90%	This species once occupied most of the arid San Joaquin Valley floor and western Coast Range valleys prior to wholesale conversion of these vegetation communities to human uses. USFWS (2022a, 2022b) document from prior assessments the loss of 96% of suitable habitat for this species compared to historical levels.	F = Decline of 10-30%	The short-term trend of this species is likely declining. USFWS (2022a, 2022b) describe continuing loss of habitat, fragmentation of existing habitat and climate change as primary threat factors attributed to this loss.	This species is comprised of three subspecies two of which (D. n. nitratoides and D. n. exilis) are listed as endangered under the federal Endangered Species Act because of habitat fragmentation and loss. The third subspecies (D. n. brevinasus) is a species of special concern based on similar threats. Combined, these taxa are threatened by conversion of habitat to agricultural uses, water managem…	2 - Agriculture & aquaculture; 2.1 - Annual & perennial non-timber crops; 7 - Natural system modifications; 7.2 - Dams & water management/use; 7.2.7 - Abstraction of ground water (agricultural use); 8 - Invasive & other problematic species, genes & diseases; 8.1 - Invasive non-native/alien species/diseases; 8.2 - Problematic native species/diseases; 11 - Climate change & severe weather; 11.1 - Ha…	This species includes two subspecies that are federally endangered. Some protection and conservation are in place in some parts of this species range. However, habitat loss and fragmentation continue and climate change and intensive water management remain threats.			VU		1	0	0	0	0	0	0	1	1	0	0	0	Short-nosed kangaroo rat is the unlisted subspecies of San Joaquin kangaroo rat	1	0	Jeff Miller
100902	Satan eurystomus	Widemouth Blindcat	Freshwater and Anadromous Fishes	G1G2	G1	2002-08-21	2012-04-11	US	N1N2	N1	2002-08-21	TX (S1)	A = 1 - 5	This species is represented by a small number of occurrences (subpopulations), perhaps only one.	U = Unknown	Total adult population size is unknown but apparently large.			U = Unknown	Trend over the past 10 years or three generations is unknown.	This species is potentially threatened by overpumping of the aquifer, which is the primary source of water for people in the region. In the 1990s the world's largest water well (at that time) was drilled close to the known habitat of the species, and the water was briefly used to support a catfish farm; subsequently the well and water rights were purchased by the San Antonio Water System, which n…	7 - Natural system modifications; 7.2 - Dams & water management/use	Known from five artesian wells penetrating the San Antonio Pool of the Edwards Aquifer in Texas; apparently abundant in the small range; potentially threatened by groundwater pollution..			VU - Vulnerable	Endangered	1	0	0	0	0	0	0	0	1	1	1	0	Krista Kemppinen: this species received a positive 90 day finding in 2009 (USFWS 2009) and its listing status is under review.	1	0	Krista Kemppinen
101067	Hesperoleucus mitrulus	Northern Roach	Fishes - Freshwater and Anadromous Bony, Cartilagi	G1	G1	2020-11-19	2020-11-19	US	N1	N1	2006-01-03	CA (S2), OR (S2)	A = 1 - 5	Confined to southeastern Oregon and Northeastern California with few unique occurrences.	U = Unknown	The global population size of the Pit roach is unknown.	D = Decline of 50-70%	The Pit roach was likely more widespread than the current distribution especially in the Big Valley region of Modoc County where a single specimen was collected in the 1960’s (Moyle et al 2015).	F = Decline of 10-30%	The number of occurrences or subpopulations is expected to "dwindle over the years" (Moyle 2002) and the effects of climate change are expected to exacerbate these declines (Moyle et al 2015).	Principal threats include habitat loss from conversion to agricultural uses and habitat degradation from unrestricted and, in places, heavy grazing in riparian areas (Moyle et al 2015). The Pit roach is susceptible to the effects of climate change particularly expected variable water availability and degraded water quality (Moyle et al 2013). Pit roach populations are also vulnerable to stochasti…	2 - Agriculture & aquaculture; 2.1 - Annual & perennial non-timber crops; 2.3 - Livestock farming & ranching; 11 - Climate change & severe weather; 11.1 - Habitat shifting & alteration	The Pit roach has disappeared from much of its former range in the Pit River drainage in California and Oregon, due to habitat degradation (resulting from human activities) and is now confined to a few scattered populations.				Vulnerable	1	0	0	0	0	1	0	0	1	0	0	0	Newer review, upgraded to full species, formerly pit roach (Hesperoleucus symmetricus mitrulus)	1	0	Noah Greewald
101071	Oncorhynchus mykiss pop. 7	Redband Trout - McCloud River	Freshwater and Anadromous Fishes	G5T1	T1	2017-12-15	2017-12-15	US	N1N2	N1	2000-12-07	CA (S1S2)	A = 1 - 5		BE = 50 - 10,000 individuals	Population sizes vary greatly within and between years. Among the four genetically distinct (non-introgressed) population ranges from 100-300 fish during drought years to 3500 fish, for example in 2011, during an above normal water year [Michael Dege, California Department of Fish and Wildlife (CDFW), pers. Comm. 2017].	BD = Decline of 50-90%	Extensive loss of habitat due over last 150 years due to introduction of non-native fish and water extraction for other resource needs. Most of redband that remain are introgressed.	G = Relatively Stable (<=10% change)	1580 genetically distinct redband returned to their native streams in 2016-2017; this includes 333 rescued fish and 1247 offspring (Michael Dege, CDFW, pers. Comm. 2017).	Largest threat is introgression with introduced, non-native fish (SOS II Final; CDFW 2017 CA). Water extraction, dams, grazing, logging, roads, water diversions, physical barriers, and drought have further impacted their populations (SOS II Final; CDFW 2017 CA). Climate change is a serious threat, compounding past impacts, with increased frequency and intensity of drought cycles, changes in timin…	2 - Agriculture & aquaculture; 2.3 - Livestock farming & ranching; 4 - Transportation & service corridors; 4.1 - Roads & railroads; 5 - Biological resource use; 5.3 - Logging & wood harvesting; 7 - Natural system modifications; 7.2 - Dams & water management/use; 8 - Invasive & other problematic species, genes & diseases; 11 - Climate change & severe weather	Small range in northern California; Widespread loss of habitat due to introgression with introduced, non-native fish. Threats from water extraction, grazing, logging, roads, water diversions, physical barriers, and drought. Only 4 genetically distinct populations occurring within about 5-15 km of remaining habitat; long-term persistence of these remaining populations is especially threatened by c…				Vulnerable	1	0	0	0	0	1	0	1	1	0	0	0	Krista Kemppinen: common name on NatureServe: Redband Trout - McCloud River Population. Other factors: drought	1	1	Krista Kemppinen
101160	Nerodia harteri	Brazos River Watersnake	Reptiles	G1	G1	2019-06-17	2019-06-17	US	N1	N1	2019-06-17	TX (S1)	B = 6 - 20	10 occurrences were delineated by buffering the known points by 5km (half the NatureServe separation distance) and assuming that the dam at Possom Kingdom Lake forms a barrier that separates that occurrence despite the close proximity. Although, 5 subpopulations were identified in the rangewide review (Scott et al. 1989) based on barriers and distance between habitat patches. Although the species…	U = Unknown	No rangewide population size estimates exist or likely will exist.	D = Decline of 50-70%	Between the reductions in habitat availability due to flooding of sections of the river and the more recent reductions in abundance, this species appears to have declined significantly (McBride 2009, Roelke and Rains 2014).	E = Decline of 30-50%	Extent of occurrence, area of occupancy, number of subpopulations, and population size probably are relatively stable or declining at a rate of less than 10 percent over 10 years or three generations.	Overall threat is considered to be very high. Occurrences are principally threatened by ongoing urban development and expansion, degradation and loss of stream habitats, drought and dam construction, and invasive fire ants.	1 - Residential & commercial development; 1.1 - Housing & urban areas; 2 - Agriculture & aquaculture; 2.3 - Livestock farming & ranching; 7 - Natural system modifications; 7.2 - Dams & water management/use; 8 - Invasive & other problematic species, genes & diseases; 8.1 - Invasive non-native/alien species/diseases; 8.2 - Problematic native species/diseases; 9 - Pollution; 9.1 - Domestic & urban w…	This species has a narrow geographic range and is affected by rapidly deteriorating aquatic habitat conditions. Small range along rocky stream of the Brazos River drainage in central Texas.			NT		1	0	0	0	0	1	0	0	1	0	0	0	Krista Kemppinen: this species' global status was last reviewed in 2019 and given a rank of G1 (NatureServe 2019). Other factors: drought.	1	1	Krista Kemppinen
101173	Ammospermophilus nelsoni	Nelson's Antelope Squirrel	Mammals	G2G3	G2	2017-09-15	2018-12-31	US	N2N3	N2	2017-09-15	CA (S2S3)	C = 21 - 80	There are 126 occurrences at 1km separation distance, 43 at 5km separation distance.			B = Decline of 80-90%	Present in less than 20% of former range.	FG = Decline of <30% to relatively stable	Ongoing declines likely.	Moderate to high threats from habitat loss and modification from agriculture and development. Additional threats from use of rodenticides and disturbance from agricultural and natural gas/oil activities.	1 - Residential & commercial development; 1.1 - Housing & urban areas; 2 - Agriculture & aquaculture; 2.1 - Annual & perennial non-timber crops	Restricted distribution in California, historic declines &gt;80%, and ongoing moderate to high threats, primarily from continued loss and modification of habitat.			EN		1	0	0	0	0	0	0	0	1	0	0	0	Krista Kemppinen: ranked as G2 in 2018 (NatureServe 2018).	1	1	Krista Kemppinen
101185	Crenichthys baileyi	White River Springfish	Freshwater and Anadromous Fishes	G2	G2	1996-09-20	2011-11-11	US	N2	N2	1996-12-05	NV (S2)	B = 6 - 20	This species is represented by fewer than 20 extant occurrences. Subspecies albivallis: when described in 1981, reported from 6 spring systems (Williams and Wilde 1981); found in only 4 spring systems in 1991 and in the late 1990s (Scoppettone and Rissler 2002).	F = 10,000 - 100,000 individuals	Total adult population size is in the 10,000s. Subspecies albivallis: total population in the four inhabited sites in the late 1990s was estimated at about 4,100-4,200 individuals (Scoppettone and Rissler 2002).Subspecies baileyi: Ash Springs population ranged from approximately 1,200 to 9,800 in the past 10 years (USFWS 1998).Subspecies grandis: In the 1990s, fewer than 125 Hiko White River spri…	E = Decline of 30-50%	Subspecies albivallis: current available habitat at the four inhabited sites is less than historical conditions; population at Preston Big Spring apparently has not declined over the past 20 years (Scoppettone and Rissler 2002).Subspecies baileyi formerly was more widely distributed (occurred commonly in the spring outflow stream as well as in the spring pool (USFWS 1998).Subspecies grandis: form…	FG = Decline of <30% to relatively stable	Trend over the past 10 years or three generations is unknown but probably relatively stable or slowly declining. Population in Hiko Spring is stable, but the one in Crystal spring is in danger of extirpation (USFWS 1998).	Declines and extirpations have resulted from habitat alterations and interactions with introduced exotic fishes such as largemouth bass, convict cichlid (Cichlasoma nigrofasciatum), shortfin molly (Poecilia mexicana), sailfin molly(P. latipinna), and mosquitofish (Gambusia affinis) (Courtenay et al. 1985; see also Tippie et al. 1991). Introduced fish species continue to affect most populations.As…	7 - Natural system modifications; 7.2 - Dams & water management/use; 8 - Invasive & other problematic species, genes & diseases; 8.1 - Invasive non-native/alien species/diseases	Small range in spring systems in the White River system, Nevada; threatened by habitat degradation and interactions with introduced fishes.		PS	VU - Vulnerable	Endangered, Threatened	1	0	0	0	0	1	0	0	1	0	0	0	C. b. baileyi and C. b. grandis are listed endangered. Other three subspecies are not petitioned yet --Maria Papadopoulos Krista Kemppinen: ranked as EN by the IUCN in 2014 (NatureServe 2014). Climate change threat (specific) coded from IUCN assessment. Threats coded except for the following from NatureServe as unclear which codes should be selected: "American Fisheries Society (Jelks et al. 2008…	1	0	Krista Kemppinen
101203	Artemisiospiza belli belli	Bell's Sage Sparrow	Birds	G5T2T3	T2	2017-11-29	2017-11-29	US	N3	N3	2017-11-29	CA (S3)	U = Unknown	Number of occurrences has not been determined but range is limited.	U = Unknown	Absolute numbers not known. North American Breeding Bird Survey (BBS) shows 94 - 111 birds per square kilometer in Riverside, California (Carlson 1983, cited in Martin and Carlson 1998). Lower abundance in less suitable habitat.	F = Decline of 10-30%	Sage Sparrow populations are declining across the West. The longest-term trend data available are based on BBS data for Sage Sparrow from 1966-2015, which shows population trend of 0.43% change/year (95% CI: -3.51, 4.51) in California. BBS Trend distribution maps of full species from 1966-2015 show mostly modest declines throughout much of A. b. belli range, with a small area of apparent increase…	F = Decline of 10-30%	Sage Sparrow populations are declining across the West, but population trends are not known for A. b. belli specifically. BBS data for Sage Sparrow in California show trend of -0.93% change/year (95% CI: -10.37, 6.14) over the 10-year, 2005-2015 period. BBS Trend distribution maps of full species from 1966-2015 show mostly modest declines throughout much of A. b. belli range, with a small area of…	Threatened by loss of habitat, predation, parasitism; effects, however, have not been quantified and need further research. Habitat: Any activity that reduces the availability of shrub-dominated ecosystems considered a threat. Fire suppression in northern California likely increased shrublands and reduced appropriate habitat for breeding. Predation: Considered major cause of nest mortality. Preda…	1 - Residential & commercial development; 7 - Natural system modifications; 7.1 - Fire & fire suppression; 8 - Invasive & other problematic species, genes & diseases; 8.2 - Problematic native species/diseases	Restricted to a limited portion of California and Baja California. Threatened by habitat loss and fragmentation.					1	0	1	0	0	0	0	0	1	0	0	0	Krista Kemppinen: natureserve common name is Bell's Sparrow. Other factors: fire suppression	1	1	Krista Kemppinen
101207	Chasiempis sandwichensis bryani	Mauna Kea 'Elepaio	Birds	G3T1	T1	2003-05-21	2003-05-21	US	N1	N1	2003-05-21	HI (S1)				Estimated subspecies population size is 2,500 birds (Scott et al. 1986).					Threats include impacts of feral ungulates and rats. Fire risk is very high.		Small, single occurrence on the island of Hawaii; population size estimated at 2,500 individuals in 1986; high threat of fire, habitat destruction by ungulates.					0	0	0	0	0	1	0	0	1	0	0	0		1	0	Noah Greewald
101231	Neotamias quadrivittatus oscuraensis	Oscura Mountains Chipmunk	Mammals	G5T1	T1	1997-12-02	2017-12-04	US	NNR	NNR		NM (S1)	A = 1 - 5			No population estimate or census has been conducted for either subspecies.			U = Unknown	Given available data, it is not possible to assess population trend.	The main threats to this subspecies are its limited mountaintop range and small population size. The piñon-juniper woodlands in which this species occurs have been impacted by drought and disease (Gaylord et al. 2013, Meddens et al. 2015). The subspecies’ mountaintop isolation severely limits its ability to disperse when climate change or other factors impact its habitat.	5 - Biological resource use; 5.3 - Logging & wood harvesting; 6 - Human intrusions & disturbance; 6.2 - War, civil unrest & military exercises; 7 - Natural system modifications; 7.1 - Fire & fire suppression; 8 - Invasive & other problematic species, genes & diseases; 11 - Climate change & severe weather	Known from one small mountain range in New Mexico. The piñon-juniper habitat in which it occurs is experiencing effects of drought.					0	0	1	0	0	0	0	1	1	0	0	0	Other factors: drought	0	1	Krista Kemppinen
101246	Thomomys bottae detumidus	Pistol River Pocket Gopher	Mammals	G5T2Q	T2	1997-08-04	1997-08-28	US	N2	N2	1996-09-05	OR (S2)	A = 1 - 5	Three occurrences have been recorded.							Damages pastures and crops--hence, a target of control programs by farmers and ranchers.		Very limited range within southwestern Oregon.					0	1	0	0	0	0	0	0	1	0	0	0	ITIS lists as valid subspecies but listed as questionable by NatureServe.	1	0	Noah Greewald
101259	Rhinichthys osculus lariversi	Big Smoky Valley Speckled Dace	Freshwater and Anadromous Fishes	G5T1	T1	1997-01-01	2018-01-09	US	N1	N1	1996-12-05	NV (S1)	A = 1 - 5	Occurs in springs and outflows, streams, pools, ponds, and intermittent streams. 3 locations in Big Smoky Valley. Occurs only in a few springs in the Big Smoky Valley in central Nevada, Nye County; found on the Charnock and Wineglass Ranches. However, Wineglass Ranch property has not been surveyed since the mid-1980s because the landowners have not provided access, so current occurrence there is …			U = Unknown	There is no information regarding long-term trends.	U = Unknown	There is no information on short-term trends.	Livestock grazing, degrading habitat around springs and streams (2013 NV WAP); considered “highly vulnerable” to climate change (2013 NV WAP, Young et al. 2012); introgression with introductions of non-native fish; water extraction and diversions (Jenkins et al. 2008).	2 - Agriculture & aquaculture; 2.3 - Livestock farming & ranching; 7 - Natural system modifications; 7.2 - Dams & water management/use; 8 - Invasive & other problematic species, genes & diseases; 11 - Climate change & severe weather	Highly restricted range. Only 3 known, isolated occurrences. Extremely vulnerable to stochastic events with such limited range and isolated occurrences. Habitat degraded, no protections in place, considered “highly vulnerable” to climate change (Young et al. 2012).				Endangered	1	0	0	0	0	1	0	1	1	0	0	0	Other factors: stochastic events	0	0	Krista Kemppinen
101279	Noturus lachneri	Ouachita Madtom	Freshwater and Anadromous Fishes	G2	G2	1996-09-19	2012-04-17	US	N2	N2	1996-12-05	AR (S2)	B = 6 - 20	This species is represented by a small number of occurrences (subpopulations). Robison and Harp (1985) mapped 17 collection sites that represent probably more than 10 but not more than 15 distinct occurrences.	F = 10,000 - 100,000 individuals	Total adult population size is unknown but likely exceeds 10,000. This species has been reported as never abundant at any locality within its range (Robison and Harp 1985), or rare to uncommon (Page and Burr 2011), but Gagen et al. (1998) found high population densities of Ouachita madtoms in several tributaries to the Alum Fork of the Saline River.	FH = Decline of <30% to increase of 25%	Extent of occurrence, area of occupancy, and number of subpopulations apparently have not decreased by more than 25% compared to the historical situation. Trend in population size is unknown.		Warren et al. (2000) and Jelks et al. (2008) categorized the status as "threatened" (not "currently stable").Trends are not well documented, but this species may be declining.Some local extirpations may be temporary. For example, madtoms can rapidly recolonize from large, deep pools stream reaches from which they have been extirpated as a result of drought (Gagen et al. 1998).	Bridge repair and construction have decimated local populations. Commercial gravel operations, stream channelization, and clearcut logging have degraded habitat (Robison and Buchanan 1988). Impoundments for a water supply for Little Rock and Benton are a potential threat (Robison and Buchanan 1988).Ouachita madtoms and associated fishes apparently die in substantial numbers as streams dry in summ…	1 - Residential & commercial development; 1.1 - Housing & urban areas; 3 - Energy production & mining; 3.2 - Mining & quarrying; 4 - Transportation & service corridors; 4.3 - Shipping lanes; 5 - Biological resource use; 5.3 - Logging & wood harvesting; 7 - Natural system modifications; 7.2 - Dams & water management/use	Small, fragmented range in Arkansas; threatened by degradation and loss of habitat from logging, commercial gravel operations, housing developments, and bridge/road building.			EN - Endangered	Threatened	1	0	0	0	0	0	1	0	1	1	1	0	positive 90 day finding in 2011 --Maria Papadopoulos	1	0	Will Harlan
101285	Perognathus longimembris brevinasus	Los Angeles Pocket Mouse	Mammals	G5T2	T2	2013-02-25	2013-02-25	US	N2	N2	2013-02-25	CA (S1S2)	BC = 6 - 80	The number of distinct occurrences has not been determined using standardized criteria, but evidently at least several occurrences are extant, based on records mentioned in Hafner et al. (1998) and Western Riverside County Multiple Species Habitat Conservation Plan (MSHCP) Biological Monitoring Program (2012), and those mapped in Brylski et al. (1998).	U = Unknown	Total adult population size is unknown. The species is occasionally common or abundant within localized colonies (Williams 1986).	AD = Decline of >50%	Distribution and abundance undoubtedly have declined greatly over the long term, but the precise degree of decline is unknown (due to a lack of adequate information on the mouse's distribution and abundance during the pre-development period in southern California).	FG = Decline of <30% to relatively stable	Trend over the past 10 years or three generations is uncertain, but distribution and abundance probably are at least slowly declining with ongoing habitat alteration.	Urbanization and agricultural development have destroyed a large percentage of the historical habitat (Williams 1986, Brylski 1998, Hafner et al. 1998).	1 - Residential & commercial development; 1.1 - Housing & urban areas; 1.2 - Commercial & industrial areas; 2 - Agriculture & aquaculture	Small range in southern California; large long-term decline as a result of habitat destruction caused by urbanization and agriculture; at least several extant occurrences; population size unknown; recent trend poorly documented; Western Riverside County Multiple Species Habitat Conservation Plan provides important protection.					1	0	0	0	0	0	0	0	1	0	0	0	CA Species of Concern	1	0	Jeff Miller
101298	Etheostoma perlongum	Waccamaw Darter	Freshwater and Anadromous Fishes	G1Q	G1	1996-09-24	2011-12-29	US	N1	N1	1996-12-05	NC (S1)	A = 1 - 5	This species is represented by a single occurrence/location.	FG = 10,000 - 1,000,000 individuals	Lindquist and Yarbrough (1982) estimated population size at approximately 125,000 (plus or minus 25%). Current population size is unknown.	U = Unknown		FG = Decline of <30% to relatively stable	Trend over the past 10 years or three generations is uncertain but probably relatively stable or slowly declining. Three generations span fewer than 10 years.	No major threats exist at the present time. The lake is somewhat protected as designated critical habitat for the federally listed Menidia extensa. Primary potential threat is degradation of water quality from recreational development, siltation, and runoff from agriculture, lawns, gardens, and septic systems (Shute 1997, Krabbenhoft et al. 2006). Removal of fallen trees from lake shoreline may d…	9 - Pollution; 9.1 - Domestic & urban waste water; 9.3 - Agricultural & forestry effluents	Occurs only in Lake Waccamaw, North Carolina; population is potentially threatened by reduced water quality associated with human activities and development around the lake.			VU - Vulnerable	Threatened	1	0	0	0	0	0	0	0	1	0	0	0	Lake Waccamaw and Phelps Lake threatened by mining and eutrophication. Could be part of a multispecies or grouping around Lake Waccamaw/Phelps Lake. Several rare and imperiled species exist only in this area.	1	0	Will Harlan
101472	Neotamias amoenus celeris	Yellow-pine Chipmunk	Mammals	G5T1	T1	2021-09-24	2021-09-24	US	N1	N1	1999-03-24	NV (S2)	A = 1 - 5	There are 4 known occurrences of this subspecies.	U = Unknown		U = Unknown	Little is known about the long-term trend, although climate change is likely degrading its habitat to the extent that declines are likely in the future.	U = Unknown	Data to assess short-term trend are not available.	This species is susceptible to climate changes that would affect its whitebark and limber pine forest habitat. The Pine Forest population is small, and along with low genetic variation, these factors can increase susceptibility to pathogens. The tick vector Borrelia hermsi is a known vector in the Humboldt yellow pine chipmunk and may represent a potential pathogen that could compromise the low g…	8 - Invasive & other problematic species, genes & diseases; 8.2 - Problematic native species/diseases; 11 - Climate change & severe weather; 11.1 - Habitat shifting & alteration	This subspecies occurs as a disjunct, isolated population that is restricted to a single mountain range where it is moderately vulnerable to climate change.					0	0	1	0	0	0	1	1	1	0	0	0		1	0	Noah Greewald
101481	Percina brevicauda	Coal Darter	Freshwater and Anadromous Fishes	G2	G2	2000-02-04	2012-04-19	US	N2	N2	2000-02-04	AL (S2)	A = 1 - 5	This species is represented by few occurrences (subpopulations). The number of locations (as defined by IUCN) is also quite small. Only the Cahaba River system seems to have a robust population.	DE = 1000 - 10,000 individuals	Total adult population size is unknown. Page and Burr (2011) described this species as locally common.		Distribution and abundance have declined significantly over the long term.	FG = Decline of <30% to relatively stable	Trend over the past three generations is uncertain but probably relatively stable or slowly declining. As of the 1990s, the Alabama Natural Heritage Program regarded populations as stable (Jim Godwin, pers. comm., 1998).	The greatest threats are the effects of pollution and urbanization. There are serious water quality problems during low water periods in the upper portion of the Cahaba River. The upper Cahaba River receives approximately half of its flow from waste water treatment plants and encompasses about 2/3 of the known range. Additionally, continued urbanization is resulting in increased siltation. Impoun…	7 - Natural system modifications; 7.2 - Dams & water management/use; 9 - Pollution; 9.1 - Domestic & urban waste water; 9.2 - Industrial & military effluents; 9.3 - Agricultural & forestry effluents	Small range in the Cahaba, Coosa, and Black Warrior river systems, Alabama; a viable population exists in the Cahaba River but elsewhere populations are small and isolated (in part by impoundments); probably extirpated from portions of range; threatened by ongoing habitat destruction/degradation; the major remaining population is threatened by severe pollution.			EN - Endangered	Threatened	1	0	0	0	0	0	0	0	1	1	1	0	positive 90 day finding in 2011 --Maria Papadopoulos	1	0	Will Harlan
101550	Storeria victa pop. 1	Florida Brown Snake, Lower Keys Population	Reptiles	G5T1Q	T1	1997-09-11	2014-03-05	US	N1	N1	1996-10-05	FL (S1)	AB = 1 - 20	Populations are known from at least five keys (see species account in Moler et al. 1992).	U = Unknown	No data exist.	DE = Decline of 30-70%	Unkown level of loss has certainly resulted from long-term loss of habitat to commercial and residential development.	F = Decline of 10-30%	Presumed declining based on continuing habitat loss on private lands, although loss rate has likely slowed with protection of much of the species' remaining habitat.	Habitat destruction, principally for residential or urban development, is an ongoing, serious threat to most remaining private lands within this snake's range.		This snake is known from very few occurrences in a tiny range in Florida's Lower Keys, where it is isolated from all presumed conspecific populations. According to the phylogenetic species concept, it could easily be considered to be a distinct species. Habitat destruction is ongoing throughout unprotected parts of the range.					1	0	0	0	1	0	0	1	1	0	0	0		1	0	Will Harlan
101620	Oncorhynchus mykiss aguabonita	California Golden Trout	Freshwater and Anadromous Fishes	G5T1	T1	2001-05-21	2013-06-03	US	N1	N1	2001-05-21	AZ (SNA), CA (S1), CO (SNA), ID (SNA), MT (SNA), NM (SNA), NV (SNA), OR (SNA), UT (SNA), WA (SNA), WY (SNA), AB (SNA)	A = 1 - 5	There is only one documented remaining nonhybridized population in the native range, in a tributary of Golden Trout Creek, and this is a small population with low viability and high vulnerability to threats (Stephens et al. 2004, Cordes et al. 2006).This subspecies has been introduced in many high mountain lakes and streams outside the native range, but surviving populations generally have hybrid…			A = Decline of >90%	Nonhybridized California golden trout are restricted to less than 1 percent of their native range (Cordes et al. 2001, 2003).	FG = Decline of <30% to relatively stable	Trend over the past 10 years or three generations is uncertain, but the abundance of nonhybridized golden trout probably has been slowly declining.	Major threats include: hybridization and introgression with stocked rainbow trout (this is the primary threat), competition with non-native brown trout and rainbow trout, predation by brown trout, habitat degradation from cattle grazing in meadows (e.g., bare and collapsed banks) and off-highway vehicle use, and inadequacy of existing regulatory mechanisms ((Matthews 1996; petition, cited by USFW…	8 - Invasive & other problematic species, genes & diseases	Very small native range in the Kern River drainage in California, but widely introduced; threatened primarily by hybridization, competition, and other negative interactions with non-native trouts.				Threatened	1	0	0	0	0	1	0	0	1	0	0	0		1	0	Noah Greewald
101630	Arborimus longicaudus	Red Tree Vole	Mammals	G2G3	G2	2022-09-16	2022-09-16	US	N3N4	N3	2005-02-22	CA (SNR), OR (S2S3)	CD = 21 - 300	There are over 10,000 observation records of red tree voles since 2000 from Oregon alone, but many of these are repeat observations at the same locations and the true number of element occurrences is unknown (ORBIC 2022). USFWS (2019) identified 11 habitat clusters in the range of the North Oregon Coast distinct population segment (DPS) based on connected habitat patches large enough to accommoda…	F = 10,000 - 100,000 individuals	Total adult population size is unknown but likely exceeds 10,000. This vole is relatively difficult to capture, so existing records likely do not reflect the true abundance of the species.	DE = Decline of 30-70%	Forsman et al. (2016) estimated red tree vole distribution in Oregon had contracted by 23% between 1914 and 2006 due to habitat loss. Rangewide habitat loss was estimated at 65% (Forsman et al. 2016). Declines were particularly severe on private lands and in the northern portion of the species range (Forsman et al. 2016). Within the range of the North Oregon Coast DPS, old forests have been great…	F = Decline of 10-30%	The short term rate of decline is unknown. Although red tree vole habitat continues to decline and become more fragmented on private and state-owned forest land in Oregon, habitat on federal lands is being maintained and is expected to continue to support red tree voles under current management regimes (Forsman et al. 2016, USFWS 2019). Most remaining red tree vole habitat is on federal land (For…	The primary threats to red tree vole populations include habitat loss and fragmentation due to forest management activities that reduce stand age, canopy interconnectedness, availability of nest structure, and increase stand fragmentation; wildfires; and climate change (Forsman et al. 2016, Huff 2016, Durham 2019, USFWS 2019). These widespread threats are ongoing. Red tree voles are old forest ob…	5 - Biological resource use; 5.3 - Logging & wood harvesting; 7 - Natural system modifications; 7.1 - Fire & fire suppression; 8 - Invasive & other problematic species, genes & diseases; 8.2 - Problematic native species/diseases; 11 - Climate change & severe weather; 11.1 - Habitat shifting & alteration	Restricted distribution in western Oregon and extreme northwestern California; prefers old-growth forest habitats that are being eliminated and fragmented by large-scale timber harvesting. Significant and ongoing threats from habitat loss due to forest management practices and increasing frequency and intensity of wildfires.			NT		1	0	0	0	0	0	0	1	1	0	0	0	Challenging negative 12-month for North Coast Oregon population.	1	0	Noah Greewald
101896	Perognathus alticola	White-eared Pocket Mouse	Mammals	G2	G2	2015-08-06	2015-08-06	US	N2	N2	2015-08-06	CA (SNR)	A = 1 - 5	The precise number of distinct occurrences has not been determined using standardized criteria, but this species is represented by a small number of known extant subpopulations and locations.	U = Unknown	Total population size is unknown but apparently small.Despite focused surveys, no specimens of subspecies alticolus have been obtained since the 1930s; this subspecies appears to be rare or extinct.Subspecies inexpectatus also is uncommon (D. F. Williams, cited by Best 1994). Searches from 1979-1981, involving 81,938 trap nights, yielded only 3 specimens from a single locality (D. F. Williams). A…	CE = Decline of 30-80%	Range extent, area of occupancy, number of subpopulations, and population size. apparently have declined over the long term, but the degree of decline is uncertain.	U = Unknown	Trend over the past 10 years or three generations is unknown.	Overall threat impact over the next 10 years or 3 generations is difficult to project but likely to be relatively low.Habitat fragmentation and isolation due to increased urbanization and agricultural intensification appear to be the major threats to this species (Dudek and ICP International 2012). However, much of the known occupied habitat is protected from outright destruction.Livestock grazin…	1 - Residential & commercial development; 1.1 - Housing & urban areas; 2 - Agriculture & aquaculture; 3 - Energy production & mining; 4 - Transportation & service corridors; 5 - Biological resource use; 6 - Human intrusions & disturbance; 7 - Natural system modifications; 8 - Invasive & other problematic species, genes & diseases; 9 - Pollution; 10 - Geological events; 11 - Climate change & sever…	Known only from small areas in southern California; subspecies inexpectatus is known to be extant at only a few localities; subspecies alticola has not been found since the 1930s; possibly the two disjunct subspecies represent separate species; recent trend and population size unknown; threat impact level over the foreseeable future may be low due to recent habitat protection.			EN - Endangered		1	0	0	1	1	0	0	1	1	0	0	0	Krista Kemppinen: latest IUCN ranking is VU (IUCN 2017). Rationale for May Warrant: according to natureserve, threat impact level over the foreseeable future may be low due to recent habitat protection. However, total population size is likely small, species is known from small areas, with 1 subspecies possibly extinct and the other known to be extant at just a few localities. Moreover, IUCN (201…	1	0	Krista Kemppinen
102109	Pseudobranchus striatus lustricolus	Gulf Hammock Dwarf Siren	Amphibians	G5T1Q	T1	2014-01-27	2014-01-27	US	N1	N1	2000-10-26	FL (S1)		Described in 1951 from 11 specimens taken at two localities in Levy and Citrus counties, Florida, and not collected since.	U = Unknown	Presumably rare, has not been found in more than 40 years since its description.		Evidently has declined to rarity, or perhaps extirpated.			The Gulf Hammock region has been severely degraded by commercial forestry; impact on wetland habitats therein is uncertain.		A subspecies so rare that it has not been seen alive for more than 40 years. Reported range is very small and is encompassed by that of P. s. spheniscus according to the analysis of Liu et al. (2004). Thus, there is uncertainty as to whether this subspecies still exists or even is valid (Moler and Kezer 1993, Liu et al. 2004).					1	0	0	1	1	0	0	1	1	0	0	0		1	0	Will Harlan
102395	Percina cymatotaenia	Bluestripe Darter	Freshwater and Anadromous Fishes	G2	G2	2001-09-07	2012-04-19	US	N2	N2	2000-10-26	MO (S2)	AB = 1 - 20	Pflieger (1997) mapped about 29 collection sites for the period 1945-1995, plus several additional historical locations that probably do not support extant populations; recent collections represent several distinct occurrences in six streams.	F = 10,000 - 100,000 individuals	Based on a rough average number of fish seined per 100 linear feet of stream in habitat known to be occupied by bluestripe darters (4.08), and on total miles of stream known to be inhabited by the species (240 mi) (Pflieger 1984), a population estimate of over 50,000 fish can be calculated. However, it is not clear whether total miles of inhabited stream includes only habitat known to be occupied…	D = Decline of 50-70%	Now rare but may have been more common before 1900 (Pflieger 1997).Pflieger (1984) indicated that his sampling experience in 1969 and 1980 suggested that the population was in slow decline.Sampling over the past several decades (though 2002) indicated that abundance and distribution have increased in some areas, whereas the upper Osage Fork population showed decline over time, and the Woods Fork …	G = Relatively Stable (<=10% change)		Threatened by habitat alteration from continued urban expansion and conversion of forest to pasture (Pflieger 1984).This species occupies stream systems that are for the most part continuous and free of substantial movement barriers such as large dams (D. Novinger, Missouri Department of Conservation)..	1 - Residential & commercial development; 1.1 - Housing & urban areas; 2 - Agriculture & aquaculture; 9 - Pollution; 9.1 - Domestic & urban waste water; 9.3 - Agricultural & forestry effluents	Occurs only in the Gasconade and Osage river drainages in Missouri; at least six but fewer than 20 occurrences; trend varies among locations, but overall apparently relatively stable; threats include habitat degradation resulting from urbanization and agricultural development.			VU - Vulnerable	Threatened	1	0	0	0	0	0	0	0	1	1	1	0	positive 90 day finding in 2011 --Maria Papadopoulos	1	0	Will Harlan
102398	Oncorhynchus mykiss pop. 24	Steelhead - Klamath Mountains Province Summer Run	Freshwater and Anadromous Fishes	G5T2T3Q	T2	2001-04-17	2001-04-17	US	N2N3	N2	2000-10-23	CA (SNR), OR (S2S3)				Populations remain severely depressed throughout the ESU (NMFS 2001).				Modest upward turn in trend in many streams in 2000 (NMFS 2001).	May be threatened by poor environmental conditions in freshwater habitat or in the ocean (NMFS 2001). Considerable habitat has been lost above impassible dams (NMFS 2001).							1	0	0	0	0	0	0	1	1	0	0	0	NMFS found Klamath Mountains Province steelhead (summer and winter) did not warrant protection in 2001. Given climate change, this one may need another look.	1	0	Noah Greewald
101748	Dipodomys elator	Texas Kangaroo Rat	Mammals	G2	G2	2006-03-09	2011-06-11	US	N2	N2	2006-03-09	OK (S1), TX (S1)	BC = 6 - 80	The number of distinct occurrences has nor been determined using standardized criteria. Considering all known occurrences (current and historical), there are certainly more than 21 occurrences or subpopulations, but probably fewer than 100 (Martin and Matocha 1972, Jones et.al 1988, Stangl and Schafer, 1990, Shaw 1990, Martin and Matocha 1991).	DE = 1000 - 10,000 individuals	Based on recent surveys (Martin, pers. comm.), population size probably exceeds 1,000. This number, however, is difficult to confirm since colonies are known only from private property, and access is often difficult to obtain.	DE = Decline of 30-70%	This species apparently has disappeared from about one-half of its former range (Martin 2002, USFWS 2011). The distribution of this species has apparently decreased from 11 counties in Texas and 2 counties in Oklahoma to 5 counties in Texas (Martin 2002). Some areas that had stable populations or occurrences of Texas kangaroo rats in the late 1980s and early 1990s no longer seem to support an obs…	FG = Decline of <30% to relatively stable	Trend over the past 10 years or three generations is unknown but probably relatively stable or slowly declining.	USFWS (2011) found that loss of burrowing habitat and genetic isolation of populations due to the conversion of native rangeland to agricultural cropland, and the inadequacy of existing regulatory mechanisms to protect against such land conversion, may pose a threat to the Texas kangaroo rat throughout all or a significant portion of its range.	1 - Residential & commercial development; 1.1 - Housing & urban areas; 2 - Agriculture & aquaculture; 2.1 - Annual & perennial non-timber crops; 7 - Natural system modifications; 7.3 - Other ecosystem modifications; 8 - Invasive & other problematic species, genes & diseases; 8.1 - Invasive non-native/alien species/diseases; 8.2 - Problematic native species/diseases	Small range in north-central Texas and adjacent Oklahoma; apparently extirpated in Oklahoma; may be extirpated in approximately 50 percent of the historical range; relatively rare and has narrow habitat requirements; major threats include conversion of habitat to agricultural uses and rangeland management practices that result in dense vegetative growth.			VU - Vulnerable		1	0	0	1	0	0	0	0	1	1	1	0	positive 90 day finding in 2011 --Maria Papadopoulos	1	0	Krista Kemppinen
101749	Oncorhynchus mykiss pop. 15	Steelhead - Oregon Coast	Freshwater and Anadromous Fishes	G5T2T3Q	T2	2000-11-29	2000-11-29	US	N2N3	N2	2000-11-19	OR (S2S3)		NMFS (1998) mentioned the existence of 40+ populations.	FH = 10,000 to >1,000,000 individuals	Current total run size is unknown but greater than 100,000 (NMFS 1996). Recent abundance data are available for only three of 40+ populations in this ESU (NMFS 1998).				Most stocks apparently declined in recent years; increases have occurred in the southern part of the range (NMFS 1996).	Primary threat comes from hatchery fishes. NMFS is very concerned about the pervasive opportunity for genetic introgression from hatchery stocks within the ESU, as well as the potential ecological interactions between introduced stocks and native stocks (NMFS 1996). Recent changes in hatchery practices should reduce risks to wild steelhead (NMFS 1998). The majority of natural stocks in this ESU m…	8 - Invasive & other problematic species, genes & diseases; 8.2 - Problematic native species/diseases	Small breeding range in coastal Oregon; most stocks have declined in recent years; majority of natural populations may not be self-sustaining; threatened by interactions with hatchery-derived conspecifics; recently implemented conservation measures have reduced the degree of risk facing this ESU.				Vulnerable	1	0	0	0	0	1	0	1	1	0	0	0		1	0	Noah Greewald
101770	Pekania pennanti pop. 1	Fisher - West Coast Distinct Population Segment	Mammals	G5T2T3Q	T2	2005-01-24	2013-09-02	US	N2N3	N2	2010-09-21	CA (S2S3), OR (S1S2), WA (SH)		The number of distinct occurrences has not been determined using standardized criteria. Moreover, the conservation status of this species is better reflected in population size and area of occupancy than by arbitrarily defined occurrences. This species is represented by a small number of occurrences (subpopulations): one in the southern Sierra Nevada and not more than a few in northern California…	E = 2500 - 10,000 individuals	Through 2004, there were no good population estimates for fisher populations in California, Oregon, and Washington (USFWS 2004). Despite the lack of precise empirical data on fisher numbers in the western states, the relative reduction in the range of the fisher on the West Coast, the lack of detections or sightings over much of its historical distribution, and the high degree of genetic relatedn…	BD = Decline of 50-90%	Fishers apparently have been extirpated in the northern Sierra Nevada of California (Zielinski et al. 1995) (but recently reintroduced), in most areas of Oregon (Aubry and Lewis 2003), and throughout Washington (Lewis and Stinson 1998) (where also recently reintroduced). Adequate population data are unavailable for much of the range.	FG = Decline of <30% to relatively stable	Trend over the past three generations (roughly 10 years) is poorly known but probably slowly declining (based on habitat trends) USFWS (2012) cited the persistence of existing populations, and noted that "preliminary analyses of the southern Sierra Nevadapopulation suggest no decline in the index of abundance (20022009)."	Historical ThreatsHabitat loss and fragmentation appear to have been major factors in the decline. Forested habitat in the Pacific coast region decreased by about 8.5 million ac (34,400 sq km) between 1953 and 1997 (Smith et al. 2001).Although exact numbers are unknown, trapping also caused a severe decline in fisher populations. Aubry and Lewis (2003) state that overtrapping appears to have been…	1 - Residential & commercial development; 2 - Agriculture & aquaculture; 2.1 - Annual & perennial non-timber crops; 2.3 - Livestock farming & ranching; 4 - Transportation & service corridors; 4.1 - Roads & railroads; 5 - Biological resource use; 5.1 - Hunting & collecting terrestrial animals; 5.3 - Logging & wood harvesting	Historical range included Washington, Oregon, and Calfornia; now much reduced and essentially confined to two populations, in the southern Sierra Nevada, California, and northern California-southern Oregon. Unregulated trapping for furs, predator bounties, and extensive, lethal predator control programs likely impacted fishers for nearly two centuries and were exacerbated by loss and fragmentatio…					1	0	0	0	0	0	0	1	1	0	0	0	Other factor is rodenticides. Listed in southern Sierra. Denial elsewhere currently being challenged.	1	1	Noah Greewald
101858	Rhinichthys osculus ssp. 2	Owens Speckled Dace	Freshwater and Anadromous Fishes	G5T1T2Q	T1	2001-05-16	2013-05-03	US	N1N2	N1	2001-05-16	CA (S1S2)	AB = 1 - 20	Populations were found in several localities in the Owens Basin during a 1988 survey by D. Sada (unpublished). Current range includes only a few scattered localities (Moyle 2002)	U = Unknown	Total adult population size is unknown but may not exceed a few thousand.	AD = Decline of >50%	Distribution has been greatly reduced over the long term (Moyle 2002). A survey of 166 sites in 1988-1990found speckled dace extirpated from most historic localities in the Owens Valley (Sada 1989)	U = Unknown	Trend over the past 10 years or three generations is unknown. Populations are small and exhibit wide fluctuations from year to year, and some populations are ephemeral (Sada 1989).	Decline since the 1930s and 1940s primarily was due to stream- and spring-flow reductions caused by diversion of water from streams and groundwater pumping, destruction of stream and riparian habitat by livestock, and interactions with introduced fishes (Sada 1989; Moyle et al. 1989, 1995). Remaining populations suffer from reduced habitat area, reduced water flows, and continued threat of introd…	2 - Agriculture & aquaculture; 2.3 - Livestock farming & ranching; 7 - Natural system modifications; 7.2 - Dams & water management/use; 8 - Invasive & other problematic species, genes & diseases; 11 - Climate change & severe weather	Small range in Owens Valley, California; range has decreased substantially as a result of water development, degradation of habitat by cattle, and introduction of non-native fishes..				Threatened	1	0	1	0	1	1	0	1	1	0	0	0		1	0	Jeff Miller
101863	Cryptobranchus alleganiensis alleganiensis	Eastern Hellbender	Amphibians	G3G4T2	T2	2018-01-25	2018-01-25	US	N3N4	N3	2001-08-13	GA (S2S3), IN (S1), KY (S1), MO (S1), NC (S3), PA (S2S3), TN (S3)	D = 81 - 300	No estimates are available, but there are many occurrences in several dozen rivers, and genetic analyses suggest there is sub-drainage structuring to populations (Unger et al. 2013). The eastern hellbender is known from 183 8-digit hydrologic units.	F = 10,000 - 100,000 individuals	Total adult population size is unknown, but likely at least 10,000. In Missouri, a single riffle (4,600 m2) had an estimated 230-270 hellbenders (Nickerson and Mays 1973, Peterson et al. 1983). Population declines are well documented (Mayasich et al. 2003, Burgmeier et al. 2011) so it is likely historic abundance estimates do not adequately reflect current abundances. Historic density estimates f…	DE = Decline of 30-70%	Compared to historical conditions, this species has significantly declined in population size, extent of occurrence, area of occupancy, and number and condition of populations to a moderate extent (Nickerson and Mays 1973, Williams et al. 1981, Minton 2001, Wheeler et al. 2003, Phillips and Humphries 2005). Some populations in Illinois (Phillips et al. 1999, Phillips and Humphries 2005), Indiana …	DE = Decline of 30-70%	Populations are still declining in most areas (Wheeler et al. 2003, Foster et al. 2009, Burgmeier et al. 2011).	The principal threat is degradation of habitat, including impoundments, channelization, ore and gravel mining, silt and nutrient runoff (e.g., from timber harvest, agriculture, faulty septic and sewage treatment systems), other water pollution, and den site disturbance due to recreational uses of rivers (Nickerson and Mays 1973, Mount 1975, Bury et al. 1980, Williams et al. 1981, Minton 2001, May…	1 - Residential & commercial development; 1.1 - Housing & urban areas; 1.3 - Tourism & recreation areas; 2 - Agriculture & aquaculture; 2.2 - Wood & pulp plantations; 3 - Energy production & mining; 3.2 - Mining & quarrying; 4 - Transportation & service corridors; 4.1 - Roads & railroads; 5 - Biological resource use; 5.4 - Fishing & harvesting aquatic resources; 7 - Natural system modifications; …	This species has undergone significant declines in population size, extent of occurrence, and area of occupancy. It depends on cool, flowing, well-oxygenated water, and it needs a coarse (rocky) substrate. It therefore faces significant threats from dams, sedimentation, and water pollution.					1	0	0	0	0	0	0	0	1	0	0	1	Received not warranted finding in 2019, but currently being challenged.	1	1	Tamara Strobel
101872	Brachyramphus brevirostris	Kittlitz's Murrelet	Birds	G2	G2	2005-01-14	2016-04-06	US	N2	N2	2005-01-14	AK (S2B,S2N), IN (SNA), WA (SNA), BC (SNA), YT (S1B)	B = 6 - 20	The number of distinct occurrences (subpopulations) is poorly known. The remote and solitary nesting habits lead to extreme difficulty in finding nests. Low nesting densities and a preference for difficult-to-reach talus slope nesting areas contribute to the fact that about two dozen nests have been found (USFWS 2002).	F = 10,000 - 100,000 individuals	USFWS (2010) estimated the world-wide population at 30,900-56,800 individuals (11,110 in Russia, the remainder in Alaska). See USFWS (2010) for a discussion of the limitations of this population estimate.		USFWS (2010) reviewed trends as follows:Russia: no data available to assess trends. South-central Alaska: In Kachemak Bay, between 1988-1999 and 2004-2007, densities declined significantly (43%) (Kuletz et al. 2008). Prince William Sound (PWS) population declined by 64% between 1989 and 2007; population may have stabilized since 2004; overall, the population trend was negative, but numbers increa…	F = Decline of 10-30%		USFWS (2010) summarized threats as follows: "At this time, the ultimate cause for the population decline of Kittlitz's murrelet is unknown. It appears the decline may be waning in some portions of its range in recent years. Major threats to Kittlitz's murrelets appear to be habitat based, caused by one or a combination of mechanisms including: change to forage fish quality and availability due to…	5 - Biological resource use; 5.4 - Fishing & harvesting aquatic resources; 6 - Human intrusions & disturbance; 6.1 - Recreational activities; 9 - Pollution; 9.2 - Industrial & military effluents; 11 - Climate change & severe weather; 11.1 - Habitat shifting & alteration	Range confined mainly to Alaska; long-term survey efforts suggest that, in at least some areas, Kittlitz's murrelets have suffered significant population declines over past decades, but declines may be beginning to subside in some areas; potentially threatened by pollution and directly or indirectly by fishing; glacial retreat and oceanic regime shifts may have caused population declines.			NT-Near Threatened		1	0	0	0	0	0	0	1	1	0	0	0	Denied protection in 2013. IUCN changed from critically endangered to near threatened in 2018, but also found to be experiencing moderately rapid declines. Bycatch is other factor.	1	1	Noah Greewald
101881	Catostomus occidentalis lacusanserinus	Goose Lake Sucker	Freshwater and Anadromous Fishes	G5T2Q	T2	2011-01-10	2011-01-10	US	N2	N2	2011-01-10	CA (S1), OR (S2)	B = 6 - 20	Confined to one lake and its tributaries; probably the subpopulations in the different tributaries should be regarded as separate occurrences. Recent data from Oregon (Scheerer et al. 2010) indicates that several distinct occurrences occur in that portion of the Goose Lake basin.	U = Unknown	Total adult population size is unknown but likely is at least a few thousand; this sucker is common in its limited range (Moyle et al. 1995).	DE = Decline of 30-70%	Long-term trend is not well known, but likely this sucker has experienced a substantial decline in area of occupancy, population size, and habitat quality.	U = Unknown		Most inhabited streams are subject to degradation by diversions, over-grazing, and other agricultural practices (Moyle et al. 1989).Goose Lake water level is subject to detrimental lowering during severe drought; diversions have made it more likely that the lake will dry up or become excessively alkaline (Moyle et al. 1995). (Goose Lake dried up completely in 1851, 1852, 1926, 1929-1934, and 1992…		Confined to one drainage basin in California and Oregon; threatened by agricultural practices on surrounding private land.			NE - Not evaluated	Vulnerable	1	0	0	0	0	0	0	0	1	0	0	0	Listed as questionable, recognized in ITIS.	1	0	Noah Greewald
101890	Gyrinophilus subterraneus	West Virginia Spring Salamander	Amphibians	G1	G1	2002-08-21	2002-08-21	US	N1	N1	2002-08-21	WV (S1)	A = 1 - 5	Known only from type locality.	AC = 1 - 1000 individuals	Reports typically are of 10 to fewer than 100 individuals per survey; population size may vary but probably totals fewer than 300 individuals.		Likely stable in extent and area of occurrence, uncertain trend in population size.		Likely stable in extent and area of occurrence, uncertain trend in population size.	No immediate threats are known, but logging in the watershed has been proposed by current owner. Owner almost broke into cave during recent pond construction project.	5 - Biological resource use; 5.3 - Logging & wood harvesting	Known from only one relatively small population in an incompletely protected cave system in West Virginia; may not be taxonomically distinct according to some taxonomists.			EN - Endangered		1	0	0	0	1	0	0	0	1	1	1	0	positive 90 day finding in 2011 --Maria Papadopoulos_x000D_ 4.4.22: not a lot more information, but more papers recognizing it as its own species vs a variant of G. porphyriticus, saved in Teams; also part of 404 SE species petition and 241 species lawsuit of 2020 (papers saved in case there is an argument for taxonomy)	1	0	Tamara Strobel
101904	Notophthalmus meridionalis	Black-spotted Newt	Amphibians	G1	G1	2001-10-30	2004-05-05	US	N1	N1	1996-11-05	TX (S2)	AB = 1 - 20	Many historical occurrences are no longer extant. USFWS survey in mid-1980s reported 5 localities, 2 in Texas and 3 in Mexico, of 221 surveyed. The localities in Mexico are few and far between, and it now seems to be absent from two of the three known localities in Mexico. It still exists in Siberia in northern Veracruz.	U = Unknown	The species has never been found to be abundant at any locality. A maximum of 25 individuals found at one site.	D = Decline of 50-70%	Once rather common in Texas, now seldom seen (Bartlett and Bartlett 1999).	F = Decline of 10-30%	Apparently still declining in Texas (Bartlett and Bartlett 1999). The populations in Mexico also seem to be very small and declining, but more field work is needed to verify the status of the species there.	Extensive habitat alteration in Texas and northeastern Mexico has had a severe impact on this newt. It has become endangered in Texas due to insecticide and herbicide use (Dixon 1987). Water pollution is also a major problem in Mexico.	1 - Residential & commercial development; 1.1 - Housing & urban areas; 1.2 - Commercial & industrial areas; 2 - Agriculture & aquaculture; 2.1 - Annual & perennial non-timber crops; 9 - Pollution; 9.2 - Industrial & military effluents; 9.3 - Agricultural & forestry effluents	Massive habitat alteration and destruction has occurred within the historical range in Texas and Mexico; breeding sites are localized and patchy; low abundance.			EN - Endangered		1	0	0	0	0	0	0	0	1	1	0	0	positive 90 day finding in 2009 --Maria Papadopoulos	1	0	Will Harlan
101944	Thamnophis sauritus pop. 1	Eastern Ribbon Snake, Lower Keys Population	Reptiles	G5T1Q	T1	1997-09-11	2014-03-05	US	N1	N1	1996-10-05	FL (S1)	AB = 1 - 20	Known from only a small number of islands (<10) in Florida's Lower Keys.	CE = 250 - 10,000 individuals	No quantitative data, so this is an estimate.	DE = Decline of 30-70%	Unkown level of loss has certainly resulted from long-term loss of habitat to commercial and residential development.	F = Decline of 10-30%	Presumably declining based on continuing habitat destruction on private lands.	Habitat destruction, particularly loss of wetlands, potentially threatens the species on all private lands within its range.		Very small number of occurrences in the Lower Florida Keys, where the freshwater wetland habitat of this population is extremely limited and threatened by residential and urban development.					1	0	0	1	1	0	0	1	1	0	0	0		1	0	Will Harlan
102056	Pimephales tenellus parviceps	Eastern Slim Minnow	Fishes - Freshwater and Anadromous Bony, Cartilagi	G4T2T3	T2	2001-10-05	2018-12-01	US	N2N3	N2	2000-02-18	MO (S2S3)	AB = 1 - 20	Pflieger (1997) mapped 5 collection sites in Missouri for the period 1945-1995, but recent collections were available for on two rivers. Robison and Buchanan (1988) mapped a couple dozen collection sites for 1960-1987, plus several additional pre-1960 sites; these encompass five river systems.	U = Unknown	Rare in Missouri (Pflieger 1997), uncommon in Arkansas (Robison and Buchanan 1988).	D = Decline of 50-70%	Documented population extirpations in Missouri (Pfleiger 1997).	U = Unknown		Apparent extirpations from the White River and St. Francis River in Missouri likely associated with reservoir construction (Pflieger 1997). Categorized as "threatened" by Warren et al. (2000) and "vulnerable" by Howard et al. (2008) due to "present or threatened destruction, modification, or reduction of a taxon's habitat or range”. Missouri Department of Conservation lists: pollution, sedimentat…	4 - Transportation & service corridors; 4.3 - Shipping lanes; 7 - Natural system modifications; 7.2 - Dams & water management/use; 7.3 - Other ecosystem modifications; 9 - Pollution	Rare to uncommon in clear streams in Missouri and Arkansas. Populations have been extirpated in Missouri due to creation of reservoirs. Ongoing threats to habitat suitability.				Vulnerable	1	0	0	1	1	0	0	0	1	0	0	0		1	0	Will Harlan
102145	Marmota olympus	Olympic Marmot	Mammals	G2G3	G2	2022-03-02	2022-03-02	US	N2	N2	2011-12-12	WA (S1S2)	B = 6 - 20	Based on a 5-km separation distance between occupied occurrences, there were about 12-13 mapped in the 2018 survey (NPS 2018). A few more probably exist along unsurveyed ridges.	DE = 1000 - 10,000 individuals	Barash (1989) believed that the total population size was fewer than 2,000, but more recent estimates put the total at 2000-4000 (Cassola 2016), reflecting better information rather than an actual population increase.	E = Decline of 30-50%	No rangewide population estimates available, but long-term monitoring at select sites from 1957-2015 show a decline of occupied sites from 28 to 17, a 40% decline in occupation (McCaffery and Jenkins 2018).	G = Relatively Stable (<=10% change)	The trend in site occupation in the recent past (2010-2015 is dynamic (some local increases, some decreases, most stable) but overall is approximately stable (McCaffery and Jenkins 2018).	The synergistic effects of predation by coyotes and tree encroachment into subalpine meadows may have been responsible for local declines in the 1990s and 2000s (S. C. Griffin, pers. comm., cited by Edelman 2003; Griffin et al. 2008, 2009). During the 1990s and 2000s, annual survival of adult females dropped to less than 70%, compared to about 89% in the 1960s; predation by coyotes was the most c…	7 - Natural system modifications; 7.1 - Fire & fire suppression; 8 - Invasive & other problematic species, genes & diseases; 8.2 - Problematic native species/diseases; 11 - Climate change & severe weather; 11.1 - Habitat shifting & alteration; 11.2 - Droughts	Small range in the Olympic Mountains of Washington State; localized declines and extirpations occurred from the late 1980s to early 2000s, but population is more or less stable at present. Coyote predation and climate change (tree encroachment into meadows) may be responsible for the declines.			LC		1	0	1	0	0	0	1	0	1	1	0	0	Petition filed.	1	0	Noah Greewald
102378	Ammodramus caudacutus	Saltmarsh Sparrow	Birds	G2	G2	2019-02-14	2019-02-14	US	N2B,N2N	N2B,N2N	1996-05-01	CT (S2B), CT (S2B), DC (SNA), DE (S2B,S3N), FL (S1S2N), GA (S3), MA (S3), MD (S2B,S1N), ME (S1B), NC (SUB,S2N), NH (S3B), NJ (S3B,S4N), NY (S3B), PA (SNA), RI (S3B), SC (S3N), TX (SNA), VA (S2B,S3N), NS (SNA)	CD = 21 - 300	This is an estimate. Highly localized in mostly patchily distributed salt marsh (Greenlaw and Rising 1994).	F = 10,000 - 100,000 individuals	Global population estimate of 80,000; estimate from C. Elphick, U. Conn., not from BBS/range data (too few routes) (PIF Science Committee 2013; http://rmbo.org/pifpopestimates ).	U = Unknown	Uncertain. No trend is evident in birds per party-hour on Christmas Bird Counts from 1996-2013 (first year treated as separate species) (National Audubon Society 2010).	D = Decline of 50-70%	A population trend of a 9.0% annual decline and declines on all scales examined for breeding saltmarsh sparrows was found for a 15-year span from 1998 to 2012 (a ca. 77% decline) for the entire northeast; for New England, the northern subset of this region, the annual decline was 12.2% (Correll et al. 2017). Given a constant rate of decline and starting with the global population estimate of 53,0…	HABITAT: Threats include human disturbance and development of habitat, and draining and filling of marshes for agriculture and urban development (Byrd and Johnston 1991). Loss of habitat to invasion of the invasive common reed (Phragmites australis) may also be a concern (Benoit and Askins 1999) at some sites. Elphick et al. (2015) found that removal of Phragmites in natural marshes does create s…	1 - Residential & commercial development; 1.1 - Housing & urban areas; 8 - Invasive & other problematic species, genes & diseases; 8.1 - Invasive non-native/alien species/diseases; 9 - Pollution; 9.2 - Industrial & military effluents; 9.3 - Agricultural & forestry effluents; 11 - Climate change & severe weather; 11.1 - Habitat shifting & alteration; 11.4 - Storms & flooding	Distribution mostly unchanged although habitat loss has contributed to some extirpations of local populations, especially in the Northeast.			EN		1	0	1	0	0	1	0	1	1	0	0	0		1	0	Noah Greewald
102424	Thomomys bottae abstrusus	Fish Spring Pocket Gopher	Mammals	G5T1	T1	2021-09-15	2021-09-04	US	NH	NH	1995-09-11	NV (S1)	A = 1 - 5	This taxon is only known from a single occurrence. Efforts to locate the taxon elsewhere have failed.	AC = 1 - 1000 individuals		U = Unknown		U = Unknown	No information is available on population trend.	This subspecies is threatened by cattle ranching which has highly degraded its habitat.	2 - Agriculture & aquaculture; 2.3 - Livestock farming & ranching	This subspecies is restricted to a small area where there are apparently few individuals.					1	0	0	0	0	0	0	0	1	0	0	0		1	0	Noah Greewald
102480	Urocitellus townsendii	Townsend's Ground Squirrel	Mammals	G2G3	G2	2022-09-27	2022-09-27	US	N3	N3	2008-10-31	WA (S3)	C = 21 - 80	In 2012 48 'Habitat Concentration Areas' were identified for this species as part of a larger connectivity project, however it not clear if these areas of suitable habitat are all occupied (Sato et al. 2012). There are 19 research grade observations in iNaturalist (iNaturalist 2022); Bureau of Land Management has 16 unique observation records, and in 2012, 8 colonies were recorded on the Hanford …	U = Unknown		AC = Decline of >70%	Between 1983 and 2013, Townsend's ground squirrels declined in conjunction with conversion of shrubsteppe habitat to agriculture (Watson and Davies 2015). The species is absent from much of its former range in the Yakima Valley (Johnson and Cassidy 1997). Remaining natural habitat may be less than 10 percent of the historical area and populations are small and isolated (Sato et al. 2012).	FG = Decline of <30% to relatively stable	Information on recent trends is lacking. This species is known to have declined or been extirpated from many sites, but it is relatively common at a number of human-modified sites (WDFW 2015).	The primary cause for the decline of Townsend’s ground squirrels is thought to be habitat destruction and fragmentation, chiefly through conversion of shrubsteppe and native grasslands to intensive agriculture and urban/suburban development (Sato et al. 2012, WDFW 2015). Remaining populations are mostly small and isolated (Yensen and Sherman 2001). Agriculture has eliminated most native habitat f…	2 - Agriculture & aquaculture; 2.1 - Annual & perennial non-timber crops; 2.3 - Livestock farming & ranching; 3 - Energy production & mining; 3.3 - Renewable energy; 4 - Transportation & service corridors; 4.1 - Roads & railroads; 5 - Biological resource use; 5.1 - Hunting & collecting terrestrial animals; 5.1.3 - Persecution/control; 7 - Natural system modifications; 7.1 - Fire & fire suppressio…	Townsend's ground squirrel has a limited range, and within the range, native habitat has declined by close to 90%. The species has declined or been extirpated from many areas and is vulnerable to a wide variety of threats. However, this species persists in human-modified habitats with sufficient soil depth.			VU		1	1	0	0	1	0	0	1	1	0	0	0		1	0	Noah Greewald
102564	Ictidomys tridecemlineatus monticola	White Mountains Ground Squirrel	Mammals	G5T1?	T1	2018-01-12	2018-01-12	US	N3	N3	1996-09-05	AZ (S1S2)	B = 6 - 20	15 element occurrences, 4 of which are verified (Horncastle et al., In Prep, 2017; Carol Chambers, Northern Arizona University, pers. comm. 2017). 8 occurrences are historical, 3 are unconfirmed; historical and unconfirmed occurrences need new survey efforts to determine if extant or extirpated.	U = Unknown		U = Unknown	No information on long-term population trend is available.	U = Unknown	No information on short-term population trend is available.	Livestock grazing common within range; populations dramatically lower in grazed meadows (In Prep, 2017; Carol Chambers, Northern Arizona University, pers. comm. 2017). The sky islands of the American Southwest are warming rapidly, and fires in the region are increasing in intensity and frequency, so climate change and high intensity fire may also threaten subspecies.	2 - Agriculture & aquaculture; 2.3 - Livestock farming & ranching; 2.3.2 - Small-holder grazing, ranching or farming; 7 - Natural system modifications; 7.1 - Fire & fire suppression; 7.1.1 - Increase in fire frequency/intensity; 11 - Climate change & severe weather	Restricted range. Occurs in montane habitat and in region undergoing rapid warming. Livestock grazing negatively impacting species.					1	0	0	0	0	0	0	1	1	0	0	0	Other factors: high intensity fire	0	1	Krista Kemppinen
102629	Siphateles bicolor vaccaceps	Cowhead Lake Tui Chub	Freshwater and Anadromous Fishes	G4T1	T1	2014-09-17	2014-09-17	US	N1	N1	1996-12-05	CA (S1), NV (S1)	A = 1 - 5	One occurrence; confined currently to about 5.4 km of slough and connected ditches (also occurs, under nondrought conditions, in an irrigation ditch in the lake bed).	AC = 1 - 1000 individuals	No population estimates are available (USFWS 1998). Six individuals were found in 1993, following a period of prolonged drought that dried up much of the habitat.			U = Unknown		Highly vulnerable to dewatering of the habitat as a result of diversion of the creeks that feed the slough, destruction of slough habitat by heavy cattle grazing (removal of riparian vegetation may expose the fishes to greater predation), and local use of pesticides by farmers and ranchers (Moyle et al. 1989, USFWS 1998). Drought, exacerbated by these factors, is also a threat. Introduction of ex…		Occurs in one site in northeastern California; very small population; vulnerable to dewatering of habitat through water diversion and drought, destruction of habitat by grazing cattle, and effects of pesticides; intoduction of exotic aquatic animals is a potential threat.				Endangered	1	0	1	0	0	1	0	0	1	0	0	0	Krista Kemppinen: drought, vandalism	1	1	Krista Kemppinen
102648	Microtus breweri	Beach Vole	Mammals	G1Q	G1	1996-11-13	2006-03-31	US	N1	N1	1996-09-05	MA (SU)	A = 1 - 5	Extant on only one island.	E = 2500 - 10,000 individuals	Population reportedly fluctuates between about 3,000 and 10,000 individuals but evidently does not exhibit regular long-term (3-4-year) cycles (Tamarin 1977).	FH = Decline of <30% to increase of 25%				Other than the small extent of occurrence and area of occupancy, no major threats are known. Potential threats include introduced predators, habitat disruption by humans, and island erosion.	8 - Invasive & other problematic species, genes & diseases; 8.1 - Invasive non-native/alien species/diseases	Very small range on one island off mainland Massachusetts; formerly occurred also on two other small islands; the population is not currently threatened, but its small range makes it vulnerable to introduced predators, human disturbance of habitat, and island erosion; there is some question as to whether this vole is specifically distinct from M. pennsylvanicus.			VU - Vulnerable		1	0	1	0	0	0	0	1	1	0	0	0	6/2022: discrepancy on taxonomy, currently valid in ITIS;	1	0	Tamara Strobel
102666	Setophaga virens waynei	Wayne's Warbler	Birds	G5T1	T1	2017-12-06	2017-12-06	US	N1	N1	2017-12-06	MD (SUB), NC (S2B), NC (S2B), SC (SNRB), VA (S1?B)			U = Unknown	Little known about overall population size (Bryan Watts, pers. comm. 2017). Highest densities appears to occur from southeastern Virginia through northeastern North Carolina (Watts et al. 2011).	A = Decline of >90%	Has declined by about 90% over the last 100 years, and this decline is continuing (Bryan Watts, pers. comm. 2017). Declines appear to be associated with large-scale removal of Atlantic white cedar that once occurred on the Albemarle-Pamlico Peninsula; these cedars were logged out a century ago (Bryan Watts, pers. comm. 2017).	A = Decline of >90%	Continuing decline, which appears to associated with conversion of remaining habitat to agriculture or pine plantations (Bryan Watts, pers. comm. 2017). S. v. waynei are found where pockets of Atlantic white cedar remain; many are now associated with low hardwoods or cypress (Bryan Watts, pers. comm. 2017). Have disappeared or declined dramatically from areas where they were once common over a pe…	Removal of Atlantic white cedar (Chamaecyparis thyoides) a century ago is presumably the cause of long-term population (90%) decline (Watts et al. 2011, Bryan Watts, pers. comm. 2017). In recent decades, much of their remaining habitat has been converted to pine plantations or for agricultural production (Bryan Watts, pers. comm. 2017. Birds wintering range is in Caribbean Basin, where there may …	2 - Agriculture & aquaculture; 2.1 - Annual & perennial non-timber crops; 2.2 - Wood & pulp plantations; 5 - Biological resource use; 5.3 - Logging & wood harvesting	Restricted range, widespread habitat loss, and dramatic, continuing population declines.					1	0	0	1	1	0	0	1	1	1	0	0		1	0	Will Harlan
103037	Synaptomys borealis sphagnicola	Northern Bog Lemming	Mammals	G5T2T3	T2	2017-12-19	2017-12-19	US	N1	N1	1996-09-05	ME (S1), NH (S1), NB (SNR), QC (SNR)	U = Unknown	Considered extremely rare, but apparent rarity could be due to difficultly in trapping them. Out of the 108 study sites surveyed from 1995-1997 in the White Mountains region researchers captured only one S. b. sphagnicola, in lowland spruce-fir stand (Yamasaki 1997, unpublished data).	U = Unknown		U = Unknown	No information on long-term population trend is available.	U = Unknown	No information on short-term population trend is available.	Threats facing this subspecies are poorly known, but include logging, development of wind farms, communication towers, and ski areas. Given it often occurs in high elevation habitat, climate change likely a threat.	1 - Residential & commercial development; 1.3 - Tourism & recreation areas; 3 - Energy production & mining; 5 - Biological resource use; 5.3 - Logging & wood harvesting	Apparently extremely rare. Poorly understood population status and trends. Threats include habitat alteration due to logging and development activity.			NT - Near threatened		1	0	0	0	1	0	0	1	1	0	1	0	9/2022: positive 90day finding in 2015 for S. borealis, with recognition that S. borealis spagnicola may be incldued	0	0	Tamara Strobel
103816	Neogale vison halilimnetes	Gulf Salt Marsh Mink	Mammals	G5T2	T2	2019-01-12	2019-01-12	US	N2	N2	1996-09-05	FL (S2)	B = 6 - 20	There are 11 occurrences as of January 12, 2019.	D = 1000 - 2500 individuals	Relatively common in occupied habitat (Humphrey and Setzer 1989).	DE = Decline of 30-70%	Kautz stated that marsh habitats, including salt marsh, had declined by 56% from 1936-1987 (1993), but other estimates specific to Gulf salt marsh were somewhat lower (Stout 1984).	U = Unknown		Stout stated that oil spills can have "acute or chronic" impacts on marsh fauna (1984). Kautz stated that marsh habitats, including salt marsh, had declined by 56% from 1936-1987 (1993) primarily due to dredging, but other estimates specific to Gulf salt marsh were lower (Stout 1984). Other threats may include habitat degradation/fragmentation and sea level rise.	7 - Natural system modifications; 9 - Pollution; 9.2 - Industrial & military effluents; 9.2.1 - Oil spills	This subspecies has a relatively small range with relatively few occurrences, as disjunct populations within that range, and likely has no connectivity to other subspecies in the state. Although little is known about this particular subspecies, the full species is in decline throughout most of its range.					1	0	0	0	1	0	0	0	1	0	0	0	A little unclear whether ITIS considers valid, but not given a ? In NatureServe.	1	0	Noah Greewald
102707	Etheostoma grahami	Rio Grande Darter	Freshwater and Anadromous Fishes	G2G3	G2	2009-05-11	2011-12-15	US	N2	N2	1996-12-05	TX (S2)	B = 6 - 20	This species is represented by roughly a dozen occurrences (but perhaps not more than 10 locations as defined by IUCN) in Texas and Coahuila, Mexico. Miller (2005) mapped eight collection sites (representing 5-6 distinct occurrences) in Mexico but did not comment on current status at those sites.	U = Unknown	Total adult population size is unknown. This species is common at a few sites in Texas (Devils River) and Mexico. Platania (1990) found that E. grahami was the most abundant fish in an area approximately 10 km below Amistad Reservoir.		Surveys in Independence Creek, Texas, 1952-2002, indicate that this species was relatively uncommon but persistent in the area (Bonner et al. 2005).Cantu and Winemiller (1997) found that E. grahami was among the 8 most abundant species in the Devils River study area, whereas previously Garrett et al. (1992), Rhodes and Hubbs (1992), and Harrell (1978) found that E. grahami was among the species t…	FG = Decline of <30% to relatively stable	Trend over the past three generations is unknown but probably relatively stable or slowly declining.	Threats include pollution, reduction of water flow, and, in some cases, elimination of water flow.Jelks et al. (2008) categorized this species as Threatened, based on present or threatened destruction, modification, or reduction of habitat or range.	7 - Natural system modifications; 7.2 - Dams & water management/use	Small range in streams in southern Texas and northeastern Mexico; low overall abundance; vulnerable to local reductions in water flow.			VU - Vulnerable	Threatened	1	0	0	0	0	0	0	0	1	0	0	0		1	0	Krista Kemppinen
102766	Cyprinodon tularosa	White Sands Pupfish	Freshwater and Anadromous Fishes	G1	G1	1996-09-20	2011-11-23	US	N1	N1	1996-12-05	NM (S1)	A = 1 - 5	This species occurs in four isolated desert spring systems (Pittenger and Springer 1999).	GH = 100,000 to >1,000,000 individuals	Total adult population size is unknown but presumably exceeds 100,000 and probably at least sometimes exceeds 1,000,000. This species is relatively abundant in most of its limited range (Pittenger and Springer 1999).		Population monitoring using catch per unit effort as a relative index of pupfish abundance detected a substantial decline in the introduced population at Mound Spring in 1995 whereas the other three habitats supported very large populations (Pittenger and Springer 1996).Populations exhibit wide fluctuations in abundance. Overall abundance in Malpais Spring, Salt Creek, and Lost River depends on e…	G = Relatively Stable (<=10% change)	Trend over the past 10 years or three generations is uncertain but likely relatively stable, with seasonal fluctuations.	Primary potential threats are natural changes or human activities that cause either dewatering or other alterations of habitat and introduction of exotic fishes (Sublette et al. 1990). Threats have been reduced by implementation of a conservation agreement involving all appropriate agencies, but extremely limited range extent and area of occupancy makes this species vulnerable to extinction from …	7 - Natural system modifications; 7.2 - Dams & water management/use; 8 - Invasive & other problematic species, genes & diseases; 8.1 - Invasive non-native/alien species/diseases; 11 - Climate change & severe weather; 11.2 - Droughts	Restricted to a few sites in the Tularosa Basin, New Mexico; abundant in extremely limited range; now benefiting from an interagency conservation agreement.			VU - Vulnerable	Threatened	1	0	1	0	0	1	0	0	1	1	1	0	under review, positive 90 day finding in 2009 --Maria Papadopoulos	1	0	Krista Kemppinen
102782	Thomomys mazama helleri	Gold Beach Pocket Gopher	Mammals	G4T1T2	T1	1993-05-25	2018-12-03	US	N1N2	N1	1996-09-05	OR (S1S2)	U = Unknown		U = Unknown		U = Unknown		U = Unknown		The Gold Beach Pocket Gopher occurs on the southern end of Oregon's Coast Range where urban development is increasing due to the demand for waterfront property and recreational opportunity (OFW 2018). The spread of exotic invasive species like Scotchbroom (Cytisus scoparius), documented as widespread across T. m. helleri's range (ODA 2018), are thought to degrade pocket gopher habitat (Steinberg …	1 - Residential & commercial development; 6 - Human intrusions & disturbance; 8 - Invasive & other problematic species, genes & diseases	This species has a highly restricted predicted range where it is threatened by development, recreational activities, and invasive exotic plants.					1	0	0	0	0	1	0	0	1	0	0	0		1	0	Noah Greewald
102845	Microtus longicaudus leucophaeus	White-bellied Vole	Mammals	G5T1	T1	2017-11-22	2017-11-22	US	N1	N1	2017-11-22	AZ (S2)	A = 1 - 5		U = Unknown	Little is known about the populations of this subspecies. Populations of the full species are known to fluctuate significantly. Densities are usually 5-16 per hectare, but can increase to more than 40 per hectare (Jones et al. 1983). The subspecies has been trapped some on Mt. Graham, where they occurred at 32% of study locations in a 100-ha, mixed-conifer forest habitat (Posthumus et al. 2015), …	U = Unknown	No information on long-term population trend is available.	U = Unknown	No information on short-term population trend is available.	The sky islands of the southwestern US are undergoing rapid warming and drying with climate change, which may result in habitat loss of the high elevation (&gt; 8,000 ft) habitat where this subspecies occurs, which is of particular concern given this subspecies only occurs in this one mountain range within a highly restricted range. Additionally, because this subspecies only occurs within about a…	7 - Natural system modifications; 7.1 - Fire & fire suppression; 11 - Climate change & severe weather	Highly restricted range. Occurs in montane habitat in region undergoing rapid warming.					0	0	1	0	0	1	0	1	1	0	0	0	Other factors: stochastic events	0	1	Krista Kemppinen
102876	Perognathus flavescens relictus	Plains Pocket Mouse	Mammals	G5T2	T2	1998-09-03	2018-11-27	US	N2	N2	1998-09-03	CO (S2)	AB = 1 - 20	Extant number of occurrences exist within the range of 1-20 (R. Schorr, pers. comm. 2018)	U = Unknown		U = Unknown		U = Unknown		There is very limited information available on this subspecies. Additional research and monitoring is needed to more clearly delineate the distribution, status, and threats associated with P. f. relictus.	Unknown/undetermined	There is limited information regarding the distribution, status, and threats of this subspecies. Rank is based primarily on restricted distribution (Armstrong et al. 2011; Schorr 2015)					0	0	0	0	0	0	0	0	1	0	0	0		1	0	Noah Greewald
102905	Asio flammeus sandwichensis	Pueo	Birds	G5T2	T2	1996-11-27	2004-04-27	US	N2	N2	1997-03-19	HI (S2)	B = 6 - 20		U = Unknown	Population size is unknown.			F = Decline of 10-30%	Rare on Oahu and apparently declining in numbers; more common on Maui, Kauai, and Hawaii, but these populations are possibly declining as well.	The Pueo is threatened by loss of habitat, predation of eggs and young by alien mammals, and possibly disease ("sick owl syndrome", a recent phenomenon possibly caused by pesticide poisoning or food shortages, is currently being studied).		Small range on main Hawaiian Islands; threatened by loss of habitat, predation of eggs and young by alien mammals, and possibly disease; likely declining in abundance.					1	0	0	0	0	1	0	0	1	0	0	0	This one is a close call as it does fairly well in disturbed habitats.	1	0	Noah Greewald
102910	Lampropeltis floridana	Florida Kingsnake	Reptiles	G2	G2	2021-04-21	2021-04-21	US	N2	N2	2021-04-21	FL (S2)	CD = 21 - 300	Uncertain, need much better current data rangewide about extant populations. Krysko et al. (2019) depict &gt; 150 records from at least 26 counties, although not all of these may be extant or represent distinct occurrences.	DE = 1000 - 10,000 individuals	Uncertain, need much better current data rangewide. Local populations can be relatively dense, although even some of the densest known have experienced sharp declines (Krysko et al. 2019).	DE = Decline of 30-70%	Historically probably occurred in every Florida county within range (Krysko et a. 2011). Although biases exist, there is ample evidence of severe declines to extirpations at various local sites (Krysko and Smith 2005, Godley et al. 2017).	EF = Decline of 10-50%	Uncertain, need much better current data. Probably relatively low numbers remain at many sites. Recent declines appear to stem from the late 1960s to early 1970s and have continued since then in Florida (Krysko and Smith 2005, Godley et al. 2017).	According to knowledgeable herpetologists, several factors are likely contributing to the species' perceived substantial decline in Florida. As for most wildlife in Florida, habitat loss and degradation have played major roles in the long-term decline; for kingsnakes, important losses have occurred in wetlands and longeaf pine forests. However, additional factors may be responsible for shorter te…	1 - Residential & commercial development; 2 - Agriculture & aquaculture; 3 - Energy production & mining; 4 - Transportation & service corridors; 4.1 - Roads & railroads; 5 - Biological resource use; 5.1 - Hunting & collecting terrestrial animals; 5.1.1 - Intentional use (species being assessed is the target); 7 - Natural system modifications; 8 - Invasive & other problematic species, genes & dise…	All kingsnakes in the L. getula complex have declined in Florida since at least the mid-twentieth century, with resulting patchy populations replacing historically more widespread ones. Habitat loss (including wetland filling) and fragmentation are surely major factors, but others include road mortality, fire ant predation on eggs and hatchlings, pollution, overcollection for the commercial pet t…					0	1	0	0	1	0	0	0	1	0	0	0		1	0	Will Harlan
102912	Cyprinella callitaenia	Bluestripe Shiner	Freshwater and Anadromous Fishes	G2G3	G2	2000-02-09	2014-03-31	US	N2N3	N2	2000-02-09	AL (S1), FL (S2), GA (S2)	BC = 6 - 80	This species is represented by at least several distinct occurrences (subpopulations) in Georgia and additional occurrences in Alabama and Florida, although more surveying and other research needs to be done to ascertain how connected or isolated populations at different localities are.	U = Unknown	Total adult population size is unknown This species can be abundant where surviving.	BE = Decline of 30-90%	A significant reduction in abundance (Boschung and Mayden 2004) and range (Maceina et al. 2007) has been detected in the Chattahoochee River system.	DF = Decline of 10-70%	A conspicuous reduction in abundance (Boschung and Mayden 2004) and range (Maceina et al. 2007) has been detected in the Chattahoochee River system.	Habitat in lower Chattahoochee has been reduced by impoundments (Mayden 1989), although the species apparently can adapt to some degree to reservoir conditions (Boschung and Mayden 2004, Mettee et al. 1996). Threats also include pollution and siltation and, secondarily, increased hybridization that is correlated with ecological disturbances (Mayden 1989).	7 - Natural system modifications; 7.2 - Dams & water management/use; 9 - Pollution	This species is endemic to the Apalachicola River drainage in Florida, Alabama, and Georgia, and has a small number of occurrences. Significant reduction of habitat has occurred and significant declines have been documented.			NT - Near threatened	Vulnerable	1	0	0	0	0	0	0	0	1	1	1	0	positive 90 day in 2011 --Maria Papadopoulos	1	0	Will Harlan
102914	Zapus trinotatus orarius	Point Reyes Jumping Mouse	Mammals	G5T2	T2	2023-02-14	2023-02-14	US	N2	N2	1997-01-15	CA (S2)	B = 6 - 20	The California Natural Diversity Database supports 5 Element occurrences of the Point Reyes jumping mouse. Given the lack of success of recent surveys in detecting this taxon in other parts of its range, there are likely fewer than 20 functional occurrences.	C = 250 - 1000 individuals		E = Decline of 30-50%	The long-term trend of this taxon likely reflects decline. Collins (2013) and Hafner et al. (1998) suggest the current aerial extent of the range of the Point Range jumping mouse is likely unchanged from historic times, but it is probably more fragmented.	F = Decline of 10-30%	The short-term trend of this taxon is probably declining. Recent trapping/survey efforts failed to detect the Point Reyes jumping mouse at some historic locations (Semenoff and Howell 2005).	Although grazing intensity has been reduced in some parts of the Point Reyes jumping mouse range, Collins (2013) estimates that thousands of domestic cattle, introduced axis deer, and a few hundred elk continue to degrade habitat for this taxon. Grazing can result in direct mortality through crushing of individuals and burrows, habitat degradation and compaction which results in sediment depositi…	2 - Agriculture & aquaculture; 2.3 - Livestock farming & ranching; 2.3.1 - Nomadic grazing	This taxon occurs almost entirely within protected National Seashore designations. It is subject to potential grazing impacts within these sites but the long-term effects of this grazing are uncertain. This taxon's range is likely about what it was historically but abundance is likely reduced and habitat fragmented.					1	0	0	0	1	0	0	0	1	0	0	0		1	0	Jeff Miller
102921	Plethodon sequoyah	Sequoyah Slimy Salamander	Amphibians	G1	G1	2020-12-21	2020-12-21	US	N1	N1	1999-06-01	AR (S1), OK (S2)	A = 1 - 5	Restricted to one or very few occurrences near the type locality.	U = Unknown		U = Unknown		U = Unknown		This species is threatened by the continued increase in tourism and recreational activities in the area, as many vacation cabins and associated business and infrastructure are coming up in this region. There are a lot of pine plantations in this region, but at this point it is difficult to determine the impact of the logging industry or the impact of of the pollutants related to the logging indus…	1 - Residential & commercial development; 1.1 - Housing & urban areas; 1.2 - Commercial & industrial areas; 1.3 - Tourism & recreation areas; 2 - Agriculture & aquaculture; 2.1 - Annual & perennial non-timber crops; 2.2 - Wood & pulp plantations; 4 - Transportation & service corridors; 4.1 - Roads & railroads; 5 - Biological resource use; 5.3 - Logging & wood harvesting; 6 - Human intrusions & di…	This species has a very limited range in the vicinity of a state park where it is subject to numerous threats.			DD		1	0	0	0	0	0	0	0	1	0	0	0		1	0	Noah Greewald
102978	Cyprinella xaenura	Altamaha Shiner	Freshwater and Anadromous Fishes	G2G3	G2	2004-07-09	2011-11-17	US	N2N3	N2	2004-07-09	GA (S2S3)	B = 6 - 20	Between 1998 and 2009, this species was documented within 18 HUC 10 watersheds (Georgia Wildlife Resources Division).		Common, at least formerly, in preferred habitat.	F = Decline of 10-30%	Historical range included 25 different HUC 10 watersheds; between 1998 and 2009, this species was documented within 18 of these watersheds (Georgia Wildlife Resources Division).	FG = Decline of <30% to relatively stable	Trend over the past three generations is unknown but probably relatively stable or slowly declining.	Threats are principally degradation and impoundment of tributary streams. Stream degradation results from failure to employ Best Management Practices (BMPs) for forestry and agriculture, failure to control soil erosion from construction sites and bridge crossings, and increased stormwater runoff from developing urban and industrial areas. Fishes that depend upon small crevices for egg deposition …	7 - Natural system modifications; 7.2 - Dams & water management/use; 8 - Invasive & other problematic species, genes & diseases; 8.1 - Invasive non-native/alien species/diseases; 9 - Pollution; 9.1 - Domestic & urban waste water; 9.2 - Industrial & military effluents; 9.3 - Agricultural & forestry effluents	Small range in streams of the Altamaha River drainage, Georgia; threatened by impoundment and degradation (e.g., siltation) of tributary streams.				Vulnerable	1	0	0	0	0	1	0	0	1	1	1	0	under review, positive 90 day finding in 2011	1	0	Will Harlan
102988	Oceanodroma homochroa	Ashy Storm-Petrel	Birds	G2	G2	2015-06-15	2015-06-15	US	N2B	N2B	1997-01-05	CA (S2), MI (SNA), BC (SNA)	B = 6 - 20	Confirmed breeding occurrences encompass 6 island groups and 3 groups of offshore rocks. About half of the total population is in one colony (Farallons), and nearly all of the remainder nest in the northern and central Channel Islands (Ainley 1995). Two major spring and summer concentration areas exist in the vicinity of the Farallon Islands and Channel Islands, California, and usually 4,000-6,00…	E = 2500 - 10,000 individuals	Carter et al. (1992) estimated the breeding population at 7,200 birds, although Ainley (1995) stated that "there is little basis to assess the accuracy of this estimate." Using the most recent population estimates (Carter et al. 1992, 2006; Sydeman et al. 1998; Nur et al. 1999; McChesney et al. 2000), Center for Biological Diversity (2007) estimated the global breeding population at a little less…	FH = Decline of <30% to increase of 25%	Data are sparse, but breeding range does not appear to have changed during the historical period (Ainley 1995). No trends are apparent from twenty years of counts of fall birds at sea in Monterey Bay (R. Stallcup, pers. comm., cited by Ainley 1995).	AF = Decline of >10%	On Southeast Farallon Island, Sydeman et al. (1998) estimated that the overall population declined 34 percent and the breeding population declined 42 percent between 1971-1972 and 1992. Assuming that the generation time is 15-16 years (half the maximum longevity record of 31 years; Bird Banding Lab data), three generations would be 45-48 years, and the decline over three generations would exceed …	Both population centers are vulnerable to oil spills from offshore drilling or tankers. The large annual concentration (most of the species' population) in Monterey Bay makes the species vulnerable to spills and other unpredictable events. Oil contamination may negatively affect storm-petrels through oiling of plumage and floating food items.On the Farallon Islands, western gulls (predators of st…	5 - Biological resource use; 5.4 - Fishing & harvesting aquatic resources; 6 - Human intrusions & disturbance; 6.1 - Recreational activities; 8 - Invasive & other problematic species, genes & diseases; 8.1 - Invasive non-native/alien species/diseases; 8.2 - Problematic native species/diseases; 9 - Pollution; 9.2 - Industrial & military effluents; 9.3 - Agricultural & forestry effluents; 9.6 - Exc…	Small range on several island groups and groups of offshore rocks and islands along coast of California and northern Baja California; total breeding population is probably under 10,000, with evidence of a major decline over the past three generations; almost 90 percent of population nests on three island groups; all U.S. nesting areas are protected; threats include predation (e.g., from increasin…			EN - Endangered		0	0	0	0	0	1	0	1	1	0	0	1	Received a negative 12 month finding in October 2013 (USFWS 2013).	1	1	Noah Greewald
103013	Cyprinodon nevadensis nevadensis	Saratoga Springs Pupfish	Freshwater and Anadromous Fishes	G2T1	T1	2014-09-22	2014-09-22	US	N1	N1	1996-12-05	CA (S1)	A = 1 - 5	Restricted to one spring and its outflows.		Densities unknown.				Population in Death Valley National Monument apparently is stable and occupies all available habitat.	Introductions of exotic species into this very limited habitat might easily wipe out this fish as could any disruption of the aquifer feeding the spring. Currently, no potentially harmful exotic species are present in Saratoga Springs (Moyle et al. 1989).		Very small range in a couple sites in southern California; vulnerability to hybridization and predation threaten this subspecies.				Threatened	1	0	1	0	0	1	0	0	1	0	0	0		1	0	Krista Kemppinen
103167	Rhinichthys osculus velifer	Pahranagat Speckled Dace	Fishes - Freshwater and Anadromous Bony, Cartilagi	G5T1Q	T1	2000-03-23	2021-08-18	US	N1	N1	1996-12-05	NV (S1)	A = 1 - 5	This species is known from 5 occurrences, 3 of which are refugia populations that require annual maintenance.	U = Unknown		D = Decline of 50-70%	Prior to the late 1980's this species was the most abundant fish in the Pahranagat Valley. Several populations have been lost and the historical range has been reduced by more than 50 percent.	E = Decline of 30-50%	This species is experiencing and ongoing decline with several populations having been lost or not detected during survey efforts since the late 1990's.	This species is threatened by predation from invasive bass and sunfish and groundwater extraction for livestock and other uses. Numerous irrigation ditches and channels throughout the valley have fragmented the Pahranagat River and degraded the habitat for speckled dace. In addition, it is threatened by cattle grazing in at least one of the known springs, as well as drought.	2 - Agriculture & aquaculture; 2.3 - Livestock farming & ranching; 7 - Natural system modifications; 7.2 - Dams & water management/use; 7.2.3 - Abstraction of surface water (agricultural use); 8 - Invasive & other problematic species, genes & diseases; 8.1 - Invasive non-native/alien species/diseases	This species has suffered a greater than 50 percent population decline and is now restricted to only a few springs and a small segment of one creek. It is threatened by non-native predatory fish, water extraction, and drought.				Endangered	1	0	0	0	1	0	0	0	1	0	0	0		0	0	Krista Kemppinen
103201	Siphateles bicolor newarkensis	Newark Valley Tui Chub	Fishes - Freshwater and Anadromous Bony, Cartilagi	G4T1	T1	2000-03-23	2021-08-04	US	N1	N1	1996-12-05	NV (S1)	B = 6 - 20	During 2004 surveys in Newark Valley, 20 subpopulations were found. At least 4 of these subpopulations were extant in a 2016 follow up survey.	E = 2500 - 10,000 individuals		EF = Decline of 10-50%	A full comprehensive survey of all currently known and historic populations has not been performed. However, surveys conducted over the past 30 years revealed several springs have dried out causing local extirpations.	F = Decline of 10-30%	The most recent survey effort in 2016 included 18 sites on the western part of the range. The surveys found only 4 existing populations, 6 sites were found dry and 8 sites did not contain the species, suggesting an ongoing decline.	Threats to this species include cattle ranching, feral horses, ground water extraction, non native fishes, drought, and spring outflow and channelization. Multiple populations have been lost from the persistent long term drought since the early 2010's.	2 - Agriculture & aquaculture; 2.3 - Livestock farming & ranching; 7 - Natural system modifications; 7.2 - Dams & water management/use; 7.2.3 - Abstraction of surface water (agricultural use); 8 - Invasive & other problematic species, genes & diseases; 8.1 - Invasive non-native/alien species/diseases; 11 - Climate change & severe weather; 11.2 - Droughts	This species occupies a small range, has undergone a population decline, and is threatened by water diversion, exotic invasive species impacts, and climate change.				Threatened	1	0	0	0	0	0	0	1	1	0	0	0		1	0	Noah Greewald
103277	Vulpes vulpes necator	Sierra Nevada Red Fox	Mammals	G5T1T2	T1	2011-05-24	2013-09-04	US	N1N2	N1	2011-05-24	CA (S1), NV (S3), OR (S1)	A = 1 - 5	This subspecies appears to be represented by a small number of occurrences (subpopulations). Because red foxes are highly mobile, distinct occurrences should encompass large areas separated by large gaps. Hence occurrences are large but few.	BC = 50 - 1000 individuals	Current population levels are unknown, but the subspecies is believed to occur at very low density (USFWS 2012), and the total population.probably is in the hundreds at most.(fewer than 1,000).	AD = Decline of >50%	Over the long term, distribution and abundance have declined, but the precise degree of decline is uncertain.	U = Unknown	Trend over the past 10 years or three generations is unknown.	Threats are poorly understood.Human-associated mortality has been caused by trapping (prior to the 1974 California prohibition), predator eradication programs associated with livestock or timber production, historical meadow overgrazing resulting in reduced prey populations, domestic dog-mediated disease vectors, and roadkill (Perrine et al. 2010).Perrine et al. (2010) summarized "potential threa…	1 - Residential & commercial development; 2 - Agriculture & aquaculture; 5 - Biological resource use; 6 - Human intrusions & disturbance; 8 - Invasive & other problematic species, genes & diseases; 11 - Climate change & severe weather	Range includes the southern Cascades (Oregon and northern California) and the Sierra Nevada in California and a portion of western Nevada; conservation status is poorly known; potentially threatened by negative impacts deriving from logging, excessive livestock grazing, development, recreation, non-native red foxes, rodent control, climate change, and other factors.					1	0	0	0	1	0	0	1	1	0	0	0	Population in Sierra now listed, but unprotected in Cascades.	1	0	Noah Greewald
103351	Cottus greenei	Shoshone Sculpin	Freshwater and Anadromous Fishes	G2	G2	1996-09-06	2011-11-09	US	N2	N2	1996-12-05	ID (S4)	C = 21 - 80	This species is represented by occurrences (subpopulations) in a couple dozen spring systems (Kuda and Griffith 1993).	G = 100,000 - 1,000,000 individuals	Population estimates for 1991: Sculpin Spring (77,600 individuals larger than 20 mm and 13,700 smaller individuals); Lower Sand Spring (78,500 larger individuals and 15,900 smaller individuals); Minnie Miller Lake (5500 larger individuals and 1280 smaller individuals (Kuda et al. 1992). Page and Burr (2011) described this species as uncommon.			G = Relatively Stable (<=10% change)	Trend over the past 10 years or three generations is uncertain but likely relatively stable. There was no evidence of a decline subsequent to surveys in the 1980s (Kuda et al. 1992). Three generations are less than 10 years.	This sculpin is threatened by loss of habitat as a result of water diversion for irrigation, power generation, and commercial fish hatcheries (Simpson and Wallace 1982). It is also negatively impacted by siltation from agricultural sources (F. Partridge, pers. comm., 1995).Jelks et al. (2008) categorized this species as Threatened due to (1) present or threatened destruction, modification, or red…	7 - Natural system modifications; 7.2 - Dams & water management/use; 9 - Pollution; 9.3 - Agricultural & forestry effluents	Small range in a couple dozen springs in Idaho; relatively abundant in some springs; threats includes water diversion and siltation.			VU - Vulnerable	Threatened	1	0	0	0	0	0	0	0	1	0	0	0		1	0	Noah Greewald
103370	Prosopium abyssicola	Bear Lake Whitefish	Freshwater and Anadromous Fishes	G1	G1	1996-09-12	2012-04-11	US	N1	N1	1996-12-05	ID (S1), UT (S1)	A = 1 - 5	This species is represented by one occurrence and one location.	U = Unknown	Total adult population size is unknown but apparently large.			G = Relatively Stable (<=10% change)	Monitoring for >20 years indicates that the population is stable (Nielson and Tolentino 2002).	Threats include degradation of habitat (lake water quality) as a result of increasing human habitation and recreation in the Bear Lake basin. This could affect whitefish directly or indirectly (e.g., through effects on whitefish prey species). Based on historical massive die-offs of other fish species in large lakes (e.g., in the Great Lakes), this species may be vulnerable to events that could l…	8 - Invasive & other problematic species, genes & diseases; 8.1 - Invasive non-native/alien species/diseases; 9 - Pollution; 9.1 - Domestic & urban waste water; 9.3 - Agricultural & forestry effluents	Occurs only in Bear Lake, Utah and Idaho; vulnerable to habitat changes and stochastic factors; based on historical massive die-offs of other fish species in large lakes (e.g., in the Great Lakes), this species may be vulnerable to events that could lead to major declines or extirpation.				Vulnerable	1	0	0	0	0	1	1	0	1	0	0	1	negative 90 day finding in 2009 --Maria Papadopoulos	1	0	Noah Greewald
103407	Oryzomys palustris pop. 2	Sanibel Island Oryzomys	Mammals	G5T1Q	T1	1996-11-08	1998-04-03	US	N1	N1	1996-09-05	FL (S1)	AB = 1 - 20	All EOs are located on one barrier island; however, there may be several small populations.		Numbers unknown. Possibly abundant where remaining.				Population has declined due to habitat destruction.	Threatened by habitat destruction: drainage, filling of marshes; lowering of water table for human consumption, woody plant invasion.		Known from only one Florida island that currently is being extensively developed.					1	0	0	1	1	0	0	0	1	0	0	0		1	1	Will Harlan
103461	Oregonichthys kalawatseti	Umpqua Oregon Chub	Freshwater and Anadromous Fishes	G2G3	G2	2004-06-07	2012-04-25	US	N2N3	N2	2004-06-07	OR (S2S3)	B = 6 - 20	This species is represented by a small number of occurrences (subpopulations). Extensive surveys throughout the Umpqua River basin in 2006-2007 (141 sites in 14 water bodies; Simon 2008) found Umpqua chub in 11 water bodies. Umpqua chub was not widespread in any of the water bodies sampled, but was primarily restricted to middle to upper reaches of tributaries. Smallmouth bass was abundant throug…	F = 10,000 - 100,000 individuals	Total adult population size is unknown but presumably exceeds 10,000. Extensive surveys throughout the Umpqua River basin in 2006-2007 (141 sites in 14 water bodies; Simon 2008) observed/captured 2,859 chubs. The species was relatively common in three areas: Cow Creek (including the lower reaches of its tributaries West Fork Cow Creek and Middle Creek), upper South Umpqua River, and Elk Creek (an…			FG = Decline of <30% to relatively stable	Trend over the past 10 years or three generations is uncertain but probably slowly declining.	This species is unlikely to be severely impacted by dams and water flow changes (Markle et al. 1991). It is potentially threatened by the increasing population of sympatric smallmouth bass (Markle et al. 1991, Simon 2008). Smallmouth bass appears to have eliminated Umpqua chub in downstream main stem sections of rivers and streams and restricted it to upstream reaches and lower order tributaries …	8 - Invasive & other problematic species, genes & diseases; 8.1 - Invasive non-native/alien species/diseases	Small range in Umpqua River drainage, Oregon; population evidently stable; potentially threated by increasing population of smallmouth bass.			VU - Vulnerable	Vulnerable	0	0	1	0	0	1	0	0	1	0	0	0		1	0	Noah Greewald
103506	Elassoma okatie	Bluebarred Pygmy Sunfish	Freshwater and Anadromous Fishes	G2G3	G2	1996-02-01	2011-11-29	US	N2N3	N2	1996-12-05	GA (S1), SC (SNR)	B = 6 - 20			This species is represented by at least several distinct occurrences (subpopulations).			G = Relatively Stable (<=10% change)	Trend over the past three generations is unknown but probably relatively stable or slowly declining.	All known sites are heavily impacted by humans (e.g., sites between highways, near boat ramp where forest was cleared) (Rohde and Arndt 1987). No known populations are threatened, but their occurrence mostly along roadsides makes them vulnerable to habitat alteration and/or pollution (Rohde and Arndt 1987).	1 - Residential & commercial development; 1.3 - Tourism & recreation areas; 9 - Pollution; 9.1 - Domestic & urban waste water	Small range in quiet waters of the Edisto, New, and Savannah river systems in South Carolina; not much threatened but vulnerable to habitat alteration and pollution.			VU - Vulnerable	Vulnerable	1	0	0	0	0	0	0	0	1	0	0	0		1	0	Will Harlan
103518	Plethodon kiamichi	Kiamichi Slimy Salamander	Amphibians	G2	G2	2001-10-01	2017-12-15	US	N2	N2	1999-06-01	AR (S1), OK (S2)	B = 6 - 20	There are currently 13-15 confirmed localities if calculating using the separation distances of 1 km for unsuitable habitat and 3 km for suitable habitat.	U = Unknown	The species appears to be locally common (Sievert and Sievert 2011; DB Shepard, pers. comm.), but relative abundance figures have not been published and population numbers have not been determined.	FG = Decline of <30% to relatively stable	Warmer average temperatures will likely produce more xeric conditions within the range of Plethodon kiamichi in the near future. The severity of those conditions is debatable, making it difficult to gauge how severe impacts to this species will be. The species has persisted through previous climatic fluctuations, so it may be that it will experience only a relatively minor decline in population n…	G = Relatively Stable (<=10% change)	The species has likely remained stable through the past three generations (approximately 18 years). Highton (2005) indicated a possible decline at two Le Flore County, Oklahoma, locations he visited between 1973 and 1984 as compared to visits made between 1995 and 1996. However, it appears that survey effort and fluctuations in population numbers between years may have played a role in that inter…	The majority (approximately 75%) of the species’ limited range is not protected, is highly fragmented, and is regularly logged by clearcutting of pine plantations. Other threats include herbicide and pesticide use, being killed on roadways, and issues related to climate change. Climate change will likely be a future threat if it produces more xeric conditions and the species is unable to find suf…	4 - Transportation & service corridors; 4.1 - Roads & railroads; 5 - Biological resource use; 5.3 - Logging & wood harvesting; 9 - Pollution; 9.3 - Agricultural & forestry effluents; 11 - Climate change & severe weather; 11.2 - Droughts; 11.3 - Temperature extremes; 11.4 - Storms & flooding	Plethodon kiamichi is a regional endemic that is currently documented as being restricted to the Kiamichi Mountains, a subrange of the Ouachita Mountains that is &gt;1700 km sq. in extent. The species’ area of occupancy is much more limited, possibly as little as 100 km sq., given that it is found primarily on northerly facing slopes. The vast majority of the species’ range is found within Oklaho…			DD - Data deficient		1	1	0	0	1	0	0	1	1	0	0	1		1	0	Will Harlan
103551	Siphateles alvordensis	Alvord Chub	Freshwater and Anadromous Fishes	G2	G2	1998-07-15	2012-02-07	US	N2	N2	1996-12-05	NV (S2), OR (S2)	B = 6 - 20	In 1978-1979, this species was recorded in 16 locations within the Alvord Basin (Williams and Bond 1983). According to the Nevada Natural Heritage Program, there are 11 extant occurrences in Nevada. The estimated condition of occurrences is 85% good and 15% fair (Carrie Carreno, pers. comm., 1998). The Oregon Heritage Program recorded 4 extant occurrences with an estimated condition of occurrence…	F = 10,000 - 100,000 individuals	Total adult population size is unknown but likely exceeds 10,000. According to Williams and Bond (1983), many populations are small and susceptible to extirpation, though the species was reported as common or abundant in some locations. Page and Burr (2011) described this species as "common in small area."Based on general descriptions, abundance is estimated at 2400 individuals in Nevada (Carrie …		The Thousand Creek Spring population has been extirpated (Williams and Bond 1983).	FG = Decline of <30% to relatively stable	Population trends are not well known; the species is believed to be stable in some areas and extirpated in others; possibly stable in Oregon, but information is not current (Eleanor Gaines pers. comm., 1998). Trend in Nevada is unknown (Carrie Carreno pers. comm., 1998).	This species is regarded as moderately threatened; many populations are small and could easily be eliminated by habitat alteration/destruction due to groundwater pumping, water diversions, and stream channelization, or through the introduction of exotic fishes (Williams and Bond 1983). Generally this chub does not coexist with other fish species (one exception is the borax chub). Competition with…	3 - Energy production & mining; 3.3 - Renewable energy; 7 - Natural system modifications; 7.2 - Dams & water management/use; 8 - Invasive & other problematic species, genes & diseases; 8.1 - Invasive non-native/alien species/diseases	Small range in Alvord Basin, Oregon and Nevada; many populations are small; vulnerable to extirpation through habitat alteration, groundwater pumping, and competition with exotic fishes; one population has been extirpated; current population trend unknown.			VU - Vulnerable	Vulnerable	1	0	0	0	1	1	0	0	1	0	0	0		1	0	Noah Greewald
103570	Perognathus amplus cineris	Wupatki Pocket Mouse	Mammals	G5T2?	T2	2017-12-18	2017-12-18	US	NU	NU	2017-12-18	AZ (S2S3)	U = Unknown		U = Unknown	Common where occurs within Wupatki National Monument (Flag_Mammal_Inv 2009).	U = Unknown		U = Unknown	Probably has declined given overgrazing and desertification has occurred throughout much of its range, and P. a. cineris is less common in grazed areas.	Habitat loss and degradation from overgrazing by livestock and feral horses probably biggest threat (Loverich et al. 2015, Chad Smith pers comm. 2017). Climate change causing increased aridity, vegetation shifts, warming, extreme events, and droughts likely an additional threat (Loverich et al. 2015).	11 - Climate change & severe weather; 11.1 - Habitat shifting & alteration	Much of range has experienced habitat degradation from overgrazing, climate change likely a threat; restricted range vulnerable to stochastic events.					1	0	0	0	0	0	0	1	1	0	0	0	Other factors: stochastic events	0	1	Krista Kemppinen
103598	Notropis semperasper	Roughhead Shiner	Freshwater and Anadromous Fishes	G2G3	G2	1996-09-17	2012-04-24	US	N2N3	N2	1996-09-05	VA (S2S3)	B = 6 - 20	Jenkins and Burkhead (1994) mapped about 38 collection sites, which may represent several distinct occurrences (subpopulations) and perhaps not more than 10 locations (as defined by IUCN).	U = Unknown	Total adult population size is unknown; this species is rare to common (generally uncommon) in different parts of its range (Jenkins and Burkhead 1994).	FH = Decline of <30% to increase of 25%	This species may have been extirpated from some parts of its historical range as a result of increased siltation near the lower boundary of the Valley and Ridge (Jenkins and Burkhead 1994).	FG = Decline of <30% to relatively stable	Trend over the past 10 years or three generations is uncertain, but distribution and abundance probably are slowly declining. Warren et al. (2000) categorized this species as "vulnerable" (not endangered or threatened, nor currently stable). Jelks et al. (2008) also rated this species as vulnerable.	Impoundment, including cold tailwater, and pulp mill effluents present slight or moderate threats to the habitat. These already have altered quality of the habitat in the Jackson River and upper James River. The roughhead shiner may be threatened by competition from the apparently recently introduced, rapidly spreading telescope shiner, Notropis telescopus (Burkhead and Jenkins 1991, Jenkins and …	7 - Natural system modifications; 7.2 - Dams & water management/use; 8 - Invasive & other problematic species, genes & diseases; 8.1 - Invasive non-native/alien species/diseases; 9 - Pollution; 9.3 - Agricultural & forestry effluents	Small range in the upper James River drainage, Virginia; generally uncommon; threats include degradation of habitat by impoundment and pulp mill effluents and competition with apparently recently introduced Notropis telescopus.			VU - Vulnerable	Vulnerable	1	0	0	0	0	1	0	0	1	1	0	0		1	0	Will Harlan
103615	Nerodia paucimaculata	Concho Watersnake	Reptiles	G2	G2	1997-02-26	2006-09-03	US	N2	N2	2006-09-02	TX (S2)	B = 6 - 20	This species is represented by a small number of distinct occurrences (subpopulations) (Scott et al. 1989).	FG = 10,000 - 1,000,000 individuals	Adult population size is unknown but presumably exceeds 10,000. As indicated by sample sizes in various field studies, this snake is locally abundant in proper habitat (Greene et al. 1994, 1999; Ernst and Ernst 2003).	FH = Decline of <30% to increase of 25%	This snake has been eliminated from a small portion of its historical range (Scott et al. 1989).	G = Relatively Stable (<=10% change)	USFWS (1990) categorized the status as "stable." This snake is more abundant and more widely distributed than was previously thought (Scott et al. 1989, Dixon 1993).	Reservoirs have flooded many miles of former stream habitat. Below dams, restriction of stream flow and prevention of floodwater scouring have resulted in siltation of rocky streambeds, encroaching vegetation, and loss of riffle habitat required by young snakes (Texas Parks and Wildlife Department). Habitat fragmentation has left some populations isolated. Populations in reservoirs may not be via…	7 - Natural system modifications; 7.2 - Dams & water management/use; 9 - Pollution; 9.1 - Domestic & urban waste water; 9.3 - Agricultural & forestry effluents; 11 - Climate change & severe weather; 11.2 - Droughts	Small range in the drainages of the Colorado and Concho rivers, Texas; some habitat has been lost as a result of reservoir construction, but watersnake populations persist along reservoir shorelines and have colonized artificial riffles created in conjunction with reservoir construction; water diversion for human use and resulting reduction in instream flows is a major threat.			NT - Near threatened		1	0	0	0	0	0	0	0	1	0	0	0	Krista Kemppinen: this species was ranked as G1 in 2019 (NatureServe 2019).	1	0	Krista Kemppinen
103642	Dipodomys heermanni dixoni	Merced Kangaroo Rat	Mammals	G4T2T3	T2	2007-10-17	2007-10-17	US	N1?	N1	2002-08-27	CA (S2S3)	AB = 1 - 20	15 recent (>1997) occurrences documented.							Threatened primarily by habitat loss.		Known from a very small area in central California; threatened by habitat loss.			NT - Near threatened		1	0	0	0	0	0	0	0	1	0	0	0	CDFW considers S2, Imperiled	1	0	Jeff Miller
103677	Anaxyrus nelsoni	Amargosa Toad	Amphibians	G2	G2	1999-01-12	2019-07-08	US	N2	N2	1999-01-12	NV (S2)	B = 6 - 20	Fourteen occurrences mapped by Nevada Natural Heritage Program; four of these have not confirmed for over 20 years.	CD = 250 - 2500 individuals	Total adult population size is uncertain but likely is at least several hundred. The 2009 population estimate for monitored sites was 1623, 13.6% less than the average of 1826 for the period 1998-2008 (Hobbs 2009, USFWS 2010).	E = Decline of 30-50%	Reportedly declined greatly from former range and abundance (Altig and Dodd 1987), but surveys in 1990s found that distribution and abundance were greater than previously known. Surveys at 20 sites since 1990 yielded the following results: apparently extirpated from one spring, decreased abundance at four springs, fluctuating but relatively constant populations at 15 sites (USFWS, Federal Registe…	F = Decline of 10-30%	No recent information, but as of 2009, population counts had risen after falling to historical lows in 2008. Counts affected by annual rainfall. The 2009 population estimate for monitored sites was 1623, 13.6% less than the average of 1826 for the period 1998-2008 (Hobbs 2009, cited in USFWS 2010).	Threats include the effects of variable rainfall on small populations, non-native predators (bullfrog, crayfish), invasive vegetation (cattails, rush, salt cedar), water diversion, livestock and feral burro overgrazing and trampling, off-road vehicle use, grading for flood control, and water pollution (Jones et al. 2003; Hammerson 2004; USFWS 2010). Commercial or other development on private land…	1 - Residential & commercial development; 1.2 - Commercial & industrial areas; 1.3 - Tourism & recreation areas; 2 - Agriculture & aquaculture; 2.3 - Livestock farming & ranching; 4 - Transportation & service corridors; 4.1 - Roads & railroads; 7 - Natural system modifications; 8 - Invasive & other problematic species, genes & diseases; 8.1 - Invasive non-native/alien species/diseases; 9 - Pollut…	Range is very small (about 20 sites in one county in Nevada); more common than previously known; conservation actions have been initiated to improve degraded habitat.			EN		1	0	1	0	1	1	0	0	1	1	0	1	New petition filed	1	1	Krista Kemppinen
103688	Graptemys ernsti	Escambia Map Turtle	Turtles	G2	G2	1996-10-21	2014-02-25	US	N2	N2	1996-10-21	AL (S2), FL (S2)	A = 1 - 5	Occurs only in three river systems (Escambia, Yellow, Choctawhatchee), the principal two of which (Escambia, Yellow) drain into a single bay (Pensacola).	DE = 1000 - 10,000 individuals	Probably several thousand individuals, but data are lacking.	FH = Decline of <30% to increase of 25%		G = Relatively Stable (<=10% change)	Periodic monitoring is needed to confirm stability.	Some adult mortality is caused by man (shooting and incidental take via methods targeting fish), and possibly some by alligator snapping turtles and raccoons. Potential threats include heavy metal pollution (or other factors that reduce mollusk populations), channelization, removal of snags, impoundment, and operation of all-terrain vehicles on nesting beaches. The species is reportedly tolerant …	5 - Biological resource use; 5.1 - Hunting & collecting terrestrial animals; 5.4 - Fishing & harvesting aquatic resources; 6 - Human intrusions & disturbance; 6.1 - Recreational activities; 7 - Natural system modifications; 7.2 - Dams & water management/use; 8 - Invasive & other problematic species, genes & diseases; 8.2 - Problematic native species/diseases; 9 - Pollution; 9.2 - Industrial & mil…	Endemic to very few relatively small river systems in western Florida and adjacent southern Alabama; locally abundant; populations appear to be relatively stable and not subject to immediate threats, though habitat destruction and degradation, vandalism, and incidental take have some impact.			NT - Near threatened		1	1	1	0	0	0	0	0	1	1	1	0	positive 90 day finding in 2011 --Maria Papadopoulos	1	0	Will Harlan
103801	Diadophis punctatus modestus	San Bernardino Ringneck Snake	Reptiles	G5T2T3	T2	2018-02-02	2018-02-02	US	N2N3	N2	1997-01-09	CA (S2?)	C = 21 - 80	No estimates are available. There are 80 observations since 2008 (Evelyn and Sweet 2012), but with limited dispersal distances it is not clear how many distinct occurrences there are.	CD = 250 - 2500 individuals	No population ecology or viability studies of San Bernadino ring-necked snake are available. With 80 observations, and limited dispersal distances, it is likely the ring-necked snake is limited in distribution, but observations suggest it can be locally abundant.	F = Decline of 10-30%	There is no information regarding long-term trends, but based on historic distribution and habitat change in the past, it is likely populations have decreased. To what degree populations have decreased is unclear.	FG = Decline of <30% to relatively stable	There is no information on short-term trends and this decline is speculation regarding likely habitat changes and recent fire intensity in Southern California.	From USFWS (2017):Habitat Loss and Modification: Given the limited distribution, and its proximity and overlap with major metropolitan regions of southern California, urban and commercial development are likely agents for habitat loss. Additionally, because of this subspecies' affinity for moist areas, flood control in developments will restrict ring-necked snakes access to appropriate habitats.M…	1 - Residential & commercial development; 1.1 - Housing & urban areas; 1.2 - Commercial & industrial areas; 5 - Biological resource use; 5.1 - Hunting & collecting terrestrial animals; 7 - Natural system modifications; 7.1 - Fire & fire suppression; 7.2 - Dams & water management/use; 11 - Climate change & severe weather; 11.1 - Habitat shifting & alteration; 11.2 - Droughts	This species has a limited distribution, and because of its proximity and overlap with major metropolitan regions of southern California, habitat loss due to urban and commercial development is likely. There is a lack of information on trends but it is likely populations have decreased, though to what degree is unclear.					1	0	0	0	0	0	0	1	1	0	0	0	Other factors: high intensity wildfires	1	1	Krista Kemppinen
103813	Noturus gilberti	Orangefin Madtom	Freshwater and Anadromous Fishes	G2	G2	1996-09-19	2012-04-17	US	N2	N2	1996-09-05	NC (S1), VA (S2)	A = 1 - 5	Five isolated populations inhabit the upper Roanoke River drainage (Jenkins and Burkhead 1994). A probably introduced population occurs in the upper James River drainage (Jenkins and Burkhead 1994).	U = Unknown	Generally this species is rare to uncommon (Page and Burr 2011).		In the Roanoke River, this species appears to extirpated in Roanoke, and population density in Salem is much reduced (Jenkins and Burkhead 1994). Populations in the North Fork Roanoke, Smith, and Little Dan rivers are minuscule or extirpated (Jenkins and Burkhead 1994).	G = Relatively Stable (<=10% change)	Since 1977, the species apparently has increased its range in Craig Creek, Big Chestnut Creek, and the South Mayo River systems.	Threats include channelization, siltation, various forms of chronic pollution, catastrophic chemical spills, impoundment, dewatering, and bait-seining (anglers collect madtoms for use as bait); low reproductive rate and short life span (Simonson 1997, Simonson and Neves 1992, Simonson 1987) exacerbate these threats (Burkhead and Jenkins 1991). Inhabited reaches of Big Chestnut Creek (Pigg River s…	5 - Biological resource use; 5.4 - Fishing & harvesting aquatic resources; 7 - Natural system modifications; 7.2 - Dams & water management/use; 9 - Pollution; 9.3 - Agricultural & forestry effluents	Small, reduced, fragmented range in the Roanoke and James river systems, North Carolina and Virginia; generally rare or uncommon; major threat is habitat degradation.			EN - Endangered	Threatened	1	0	0	0	0	0	0	0	1	1	1	0	positive 90 day finding in 2011 --Maria Papadopoulos	1	0	Will Harlan
103920	Percina burtoni	Blotchside Logperch	Freshwater and Anadromous Fishes	G2G3	G2	2007-11-21	2012-04-25	US	N2N3	N2	2007-11-21	AL (S1), KY (SX), NC (S1), TN (S2), VA (S1)	BC = 6 - 80	This species is known from several dozen localities (some closely adjacent in the same river) that may represent roughly a couple dozen distinct occurrences (subpopulations).	U = Unknown	Total adult population size is unknown. Populations generally have low densities (Jenkins and Zorach, in Lee et al. 1980), perhaps naturally so (Jenkins and Burkhead 1994). This species is uncommon or rare in all extant populations (Jenkins and Burkhead 1994), but it is not easy to capture, and both abundance and distribution may be slightly greater than available records indicate (Etnier and Sta…	E = Decline of 30-50%	This species is apparently extirpated in the Cumberland River drainage, and some populations in the Tennessee River drainage apparently have been extirpated (Jenkins and Zorach, in Lee et al. 1980; Etnier and Starnes 1993; Jenkins and Burkhead 1994; Boschung and Mayden 2004).Jenkins and Burkhead (1994) noted that this species appears to have recently expanded its range or locally increased its po…	FG = Decline of <30% to relatively stable	Trend over the past 10 years or three generations is uncertain but probably relatively stable or slowly declining. Three generations span roughly 10 years or less.	This species probably is detrimentally affected by siltation, turbidity, chemical pollution, and impoundment (Burkhead and Jenkins 1991). Warren et al. (2000) categorized this species as "vulnerable." Jelks et al. (2008) rated it as "threatened, " based on present or threatened destruction, modification, or reduction of habitat or range.	7 - Natural system modifications; 7.2 - Dams & water management/use; 9 - Pollution; 9.3 - Agricultural & forestry effluents	Disjunct distribution in the Tennessee and Cumberland river drainages of Tennessee, Alabama, North Carolina, Virginia, and (formerly) Kentucky; apparently extirpated in the Cumberland River drainage; local extirpations have occurred as a result of impoundments, siltation, and water quality degradation; the remaining populations are highly isolated and comprise relatively few individuals; better i…			VU - Vulnerable	Threatened	1	0	0	0	1	0	0	1	1	0	0	0	Recommended for listing by Luke Etchison / NCWRC fisheries biologist. Some populations split into a different species in 2017, making it more imperiled.	1	0	Will Harlan
104072	Percina sipsi	Bankhead Darter	Freshwater and Anadromous Fishes	G1	G1	1998-07-09	2012-04-10	US	N1	N1	2000-10-20	AL (S1)	A = 1 - 5	This species is known from several collection sites in 4 streams (Boschung and Mayden 2004, Kuhajda 2004, Williams et al. 2007). Each stream may represent a single location (as defined by IUCN).	DE = 1000 - 10,000 individuals	Total adult population size is unknown but apparently small. This darter is rarely abundant; collections typically yield few individuals (Kuhajda 2004).	EG = Decline of <50% to Relatively Stable	Historically, this species probably occurred farther downstream in Sipsey Fork, but the habitat downstream has been lost to an impoundment (Lewis Smith Reservoir) (Kuhajda 2004, Williams et al. 2007).	G = Relatively Stable (<=10% change)	The current population in the upper Sipsey Fork is believed to be stable (Jim Godwin and Bernie Kuhajda, pers. comm., 1998).	Riverine habitat in the lower reaches of the Sipsey Fork was destroyed in 1960 by the Alabama Power Company impoundment behind Lewis Smith Dam.Current threats include sedimentation from logging and road construction by the timber industry (Kuhajda 2004). Implementation of riparian zone protection by the U.S. Forest Service for endangered mussels in the Sipsey Fork should reduce threats from loggi…	7 - Natural system modifications; 7.2 - Dams & water management/use; 9 - Pollution; 9.3 - Agricultural & forestry effluents	Known only from upper Sipsey Fork system of the Black Warrior River, Alabama; abundance is low; limited distribution makes it vulnerable to localized habitat alterations; sedimentation from poor forestry management practices is a threat; may benefit from riparian zone protection for endangered mussels.			VU - Vulnerable	Endangered	1	0	0	0	0	0	0	0	1	1	1	0	positive 90 day finding in 2011 --Maria Papadopoulos	1	0	Will Harlan
104145	Noturus fasciatus	Saddled Madtom	Freshwater and Anadromous Fishes	G2	G2	2006-01-19	2012-04-16	US	N2	N2	2006-01-19	TN (S2)	B = 6 - 20	This species is represented by a relatively small number of extant occurrences and locations (as defined by IUCN). Burr et al. (2005) reported a total of 59 historical collections containing 540 specimens from 33 localities. A 1992 survey resulted in collections at 13 of 33 sites (Eisenhour et al. 1996).	U = Unknown	Total adult population size is unknown. Burr et al. (1993) regarded this species as rare in the mainstem of the upper Duck River and more common in the lower reaches. Page and Burr (2011) categorized this species as uncommon.Due to its small size and secretive nature, this species is difficult to survey (Peggy Shute, pers. comm., 1998).	E = Decline of 30-50%	Museum collections and previous field work indicate that abundance and range have declined (Eisenhour et al. 1996). A comparison of historical collections and a 1992 survey indicate either dramatic reductions in abundance and range over a 10-20 year period prior to 1992 or less effective collecting efforts during the 1992 survey (e.g., diurnal sampling of a nocturnal species). Historical collecti…	U = Unknown	Trend over the past three generations is uncertain but probably slowly declining.	Potential threats include habitat loss or alteration due to impoundment, channelization, removal of riparian vegetation, bridge construction, runoff from agricultural land, and range fragmentation (Burr et al. 1993, 2005; Eisenhour et al. 1996).Recent bridge construction was observed at several historical localities in the Buffalo River system. Bridge construction alters stream hydrology, modifie…	2 - Agriculture & aquaculture; 2.1 - Annual & perennial non-timber crops; 4 - Transportation & service corridors; 4.1 - Roads & railroads; 7 - Natural system modifications; 7.2 - Dams & water management/use; 9 - Pollution; 9.3 - Agricultural & forestry effluents; 11 - Climate change & severe weather; 11.2 - Droughts	Restricted range in the Duck River drainage and nearby Tennessee River tributaries, Tennessee; uncommon and probably declining; threats include habitat loss or alteration due to impoundment, channelization, removal of riparian vegetation, bridge construction, runoff from agricultural land, and range fragmentation.			EN - Endangered	Vulnerable	1	0	0	0	0	0	0	0	1	1	1	0	under review; positive 90 day finding in 2011 --Maria Papadopoulos	1	0	Will Harlan
104146	Kinosternon baurii pop. 1	Striped Mud Turtle, Lower Keys Population	Turtles	G5T1Q	T1	2014-02-25	2014-02-25	US	N2	N2	1996-10-05	FL (S1)	B = 6 - 20		CE = 250 - 10,000 individuals	Total number of individuals is unknown. Largest populations may be in pockets of especially favorable habitat on some of the smaller islands (e.g., Summerland Key, where a population of several hundred was estimated for the area south of Highway 1; Dunson 1992). Big Pine Key has only a small population (Dunson 1992). Population estimate for Johnston Key was about 50 (Dunson 1992).	U = Unknown		U = Unknown	Need to determine this.	Rapid habitat destruction in the Keys is the major threat (Dunson 1992). Human perturbation of water table could be disastrous, as the species depends upon shallow wetlands. Sea level rise that is projected to accompany global warming may inundate much of the range of this species, and even if wetlands persist, they may be degraded by saltwater intrusion beyond the limits of tolerance of this tur…		Very small range and occurs only on some islands in the Lower Keys of Florida, an area which is currently undergoing rapid development and probably depleting the water table. Sea level rise projected to accompany global warming may threaten the entire ecosystem on which this turtle depends.					1	0	0	1	1	0	0	1	1	0	0	0		1	0	Will Harlan
104154	Perognathus flavescens melanotis	Plains Pocket Mouse	Mammals	G5T1	T1	1997-02-27	1997-02-27	US	NH	NH	2000-10-20	AZ (SH)	A = 1 - 5	Known only from two locations.	U = Unknown				U = Unknown		Hoffmeister (1986) surmised that farming activities may have resulted in the extirpation of this mouse from southeastern Arizona.		Known only from the type locality in Chihuahua, Mexico, and from a single site in southeastern Arizona (where apparently extirpated, possibly as a result of farming activities.)					1	0	0	0	0	0	0	0	1	0	0	0	Krista Kemppinen: Apparently extirpated from the US.	1	0	Krista Kemppinen
104192	Etheostoma sp. 3	Lower Coosa Darter	Freshwater and Anadromous Fishes	G1G2Q	G1	1997-07-02	1999-03-03	US	N1	N1	2000-10-20	AL (S1)		Mettee et al. (1996) mapped 10 collection sites (as E. DITREMA).							Threats include water quality degradation (potential), lowering of aquifer, and loss of aquatic vegetation in spring habitat. Probably very sensitive to changes in physical habitat such as temperature, turbidity, and pH.		Small range in lower Coosa River, system, Alabama; potentially threatened by habitat degradation.					1	0	0	1	1	0	1	1	1	0	0	0		1	0	Will Harlan
104195	Relictus solitarius	Relict Dace	Freshwater and Anadromous Fishes	G2G3	G2	1998-08-06	2012-04-25	US	N2N3	N2	1998-08-06	NV (S2S3)	B = 6 - 20	This species is known from a few dozen collection sites (Hubbs et al. 1974), but not all of these sites have extant populations.	F = 10,000 - 100,000 individuals	Total adult population size is unknown but presumably exceeds 10,000. This species is regarded as common in its small range (Page and Burr 2011).			U = Unknown	Trend over the past 10 years or three generations is unknown but probably not rapidly declining.	Threatened by introduction of exotic gamefish species and habitat loss (e.g., cattle grazing at springs and outflows, irrigation for rangeland cattle grazing) (J. Heinrich, pers. comm., 1995).In the 1940s, this species was abundant but was extirpated in many areas due to habitat alterations (spring and outflow modifications for agriculture) and introduction of non-native species such as largemout…	7 - Natural system modifications; 7.2 - Dams & water management/use; 8 - Invasive & other problematic species, genes & diseases; 8.1 - Invasive non-native/alien species/diseases	Common in small range in springs, ponds, marshes, and streams in eastern Nevada; threats include introductions of exotic species and habitat loss/degradation (such as through modification of habitat for cattle grazing).			EN - Endangered	Vulnerable	1	0	0	1	0	1	0	1	1	1	1	0	Krista Kemppinen: the IUCN ranked this species as NT in 2014. Inadequacy of existing mechanisms and climate change coded from IUCN assessment.	1	0	Krista Kemppinen
104238	Arborimus longicaudus silvicola	Dusky Tree Vole	Mammals	G3G4T1Q	T1	2005-02-28	2005-02-28	US	N1	N1	2005-02-28	OR (S1)		No EOs on record		Unkown					Logging of old-growth forests forces species to less desirable areas where they exist, seldom found in trees (25 yrs old)		Remaining old-growth Douglas-fir forest threatened by logging					1	0	0	0	0	0	1	1	1	0	0	0	Under consideration for listing as a DPS.	1	0	Noah Greewald
104247	Ensatina eschscholtzii klauberi	Large-blotched Salamander	Amphibians	G5T2?	T2	2017-12-15	2017-12-15	US	N2N3	N2	2001-05-21	CA (S3)	C = 21 - 80	Abundance estimates lacking. Numerous localities (&gt;30) on Cleveland National and Forest; San Bernardino National Forest has ca. 30 historical records, but current surveys lacking (Evelyn and Sweet 2012).	U = Unknown		U = Unknown		FG = Decline of <30% to relatively stable	Population trend data lacking; but there appear to be persistent populations and stable habitat trends (Evelyn and Sweet 2012). Others report recent and widespread declines (http://www.californiaherps.com/salamanders/pages/e.e.klauberi.html, 2017)	Habitat is vulnerable to fire and fires are increasing in frequency and intensity with climate change and past fire suppression. Timber extraction and removal of woody debris depletes refugia and nesting habitat. Additional threats include mining extraction, feral pigs, and vehicle strike mortality. Batrachochytrium dendrobatidis (chytrid) could be a threat, but its presence in E. e. klauberi hav…	3 - Energy production & mining; 3.2 - Mining & quarrying; 4 - Transportation & service corridors; 4.1 - Roads & railroads; 5 - Biological resource use; 5.3 - Logging & wood harvesting; 7 - Natural system modifications; 7.1 - Fire & fire suppression; 7.1.1 - Increase in fire frequency/intensity; 8 - Invasive & other problematic species, genes & diseases; 11 - Climate change & severe weather	Small range. Populations may be declining. Habitat vulnerable to fire; fires regionally increasing in frequency and intensity with climate change (evidenced by increased droughts, warming, and more extreme weather events). Additional threats from timber extraction, feral pigs, and vehicle strikes, and potentially chytrid fungal disease.					1	0	0	0	0	1	0	0	1	0	0	0		1	1	Jeff Miller
104346	Sphaerodactylus notatus notatus	Florida Reef Gecko	Reptiles	G5T2T3	T2	2014-02-05	2014-02-05	US	N5	N5	2005-09-26	FL (S2)	CD = 21 - 300	Krysko et al. (2011) cite 380 vouchered records and depict dozens of known sites within the subspecies' limited range. It is known from many islands in the Florida Keys in addition to sites on the mainland.	EH = 2500 to >1,000,000 individuals	No good data exist, though there probably are many large populations.	FH = Decline of <30% to increase of 25%	An estimate only.	G = Relatively Stable (<=10% change)	An estimate only.	The principal threat is potential loss of most terrestrial habitats in the Florida Keys ecosystem as a result of sea level rise from global climate change. This would require several decades at least.		Normally, an element restricted to the Florida Keys and Atlantic Coastal ridge of extreme southeastern Florida would be assigned a rank of 2. However, this species' tolerance of human disturbance of habitats, and its likely ability to migrate inland with sea level rise, make it more secure than more narrow habitat specialists. The overall population is probably very large in terms of numbers of i…					1	0	0	0	0	0	0	1	1	0	0	0		1	0	Will Harlan
104365	Dipodomys microps leucotis	Marble Canyon Kangaroo Rat	Mammals	G5T2T3	T2	2018-11-27	2018-11-27	US	N2	N2	1997-01-15	AZ (S2)	U = Unknown		U = Unknown		E = Decline of 30-50%	It is estimated that D. m. leucotis occupies half of its potential and former range (USFS 2014)	U = Unknown		Limited distribution and low abundance makes this taxon especially sensitive to threats, including intensive grazing activities both present and past (O'Farrell 1995)	2 - Agriculture & aquaculture; 2.3 - Livestock farming & ranching; 8 - Invasive & other problematic species, genes & diseases	Restricted range, patchy distribution and low relative abundance.			VU		1	0	0	0	0	0	0	0	1	0	0	0		0	0	Krista Kemppinen
104399	Sciurus niger avicennia	Mangrove Fox Squirrel	Mammals	G5T2	T2	1996-11-06	1998-04-03	US	N2	N2	1996-09-05	FL (S2)	B = 6 - 20	Found in suitable habitat throughout most of range. Extirpated populations in eastern and southern Dade County were intergrades between S. N. AVICENNIA and S. N. SHERMANI (Humphrey and Jodice 1992).		Occurs at low densities over much of range.			F = Decline of 10-30%	Reliable, recent population estimates are not available, but evidently population densities are low and local declines have been reported (see Humphrey and Jodice 1992). Range is essentially unchanged from that described several decades ago, though some areas have been vacated and many other areas are being altered or becoming isolated through development (Humphrey and Jodice 1992).	Main threat is habitat destruction and degradation. Initial decline probably was due to logging of mature pine and cypress forests in the late 1800s and early 1900s. Subsequent urbanization along the south Florida coast also resulted in habitat loss. Continued development of urban areas is isolating and threatening the viability of some populations, including those on golf courses (Jodice and Hum…		Occurs at low densities in southern Florida; threatened by continuing loss of habitat; illegal hunting continues to pressure already low populations.					1	0	0	0	1	0	0	1	1	0	0	0		1	0	Will Harlan
104407	Alosa alabamae	Alabama Shad	Fishes - Freshwater and Anadromous Bony, Cartilagi	G2?	G2	2023-02-06	2023-02-06	US	N2N3	N2	2011-05-08	AL (S2), AR (S1), FL (S1S2), GA (S1), IA (SH), IL (SH), IN (SX), KY (S1), LA (S1), MO (S2), MS (S1), OK (S2), TN (SH)	B = 6 - 20	It is estimated that ten out of the 21 known river systems still support spawning subpopulations with suitable, accessible habitat, and include the Apalachicola drainage, parts of the Mississippi, Missouri, Meramec, White, Ouachita, Pascagoula, Escambia (and Conecuh), Choctawhatchee and Suwannee rivers (NOAA 2017, Sammons et al. 2021).	U = Unknown	Total adult population size is unknown. Population estimates have been made for the Apalachicola River, which is considered the largest population (Ely et al. 2008, Young et al. 2012). Estimates range from as low as 838-5,031 individuals in 2006 to as hig	DE = Decline of 30-70%	Highly fluctuating population sizes between years and a lack of long-term data available make it difficult to determine trends (NOAA 2017). However, distribution and abundance have greatly diminished with only ten out of the 21 known river systems still supporting spawning subpopulations (NOAA 2017), and the species has been eliminated from much of its former inland distribution, especially in th…	F = Decline of 10-30%	Highly fluctuating population sizes between years and a lack of long-term data available make it difficult to determine trends (NOAA 2017). Based on the rivers where this species was distributed in 2001 and 2010 (Smith et al. 2011), the area of occupancy declined by from 8,816 km² in 2001 to 6,576 km² in 2010 and the extent of occurrence declined by from 897,311 km² in 2001 and 341,562 km² in 201…	As this is an anadromous fish that requires an extensive spawning migration from coastal marine waters into natal rivers, the decline of this species’ global population and distribution is likely to be due to the modification and impoundment of riverine systems (NOAA 2017, Sammons et al. 2021, Smith et al. 2011). Locks and dams built for navigation, hydroelectric generation, and flood control hav…	4 - Transportation & service corridors; 4.3 - Shipping lanes; 5 - Biological resource use; 5.4 - Fishing & harvesting aquatic resources; 6 - Human intrusions & disturbance; 6.3 - Work & other activities; 7 - Natural system modifications; 7.2 - Dams & water management/use; 9 - Pollution; 9.2 - Industrial & military effluents; 9.3 - Agricultural & forestry effluents; 11 - Climate change & severe we…	Once widely distributed throughout the coastal waters and associated rivers of the Gulf of Mexico, Alabama Shad abundance and extent of habitat have been greatly reduced from historical levels due to blockage of the spawning migration by locks and dams and by habitat degradation from siltation and pollutants. Although data since 2000 indicate a stable or even increasing population size within its…			DD	Threatened	1	1	0	1	0	0	1	1	1	1	1	0		1	0	Will Harlan
104413	Cyprinella lepida	Plateau Shiner	Freshwater and Anadromous Fishes	G1G2	G1	2001-02-28	2011-11-16	US	N1N2	N1	2001-02-28	TX (S1S2)	A = 1 - 5	This species is represented by a small number of occurrences; apparently it occurs in only two rivers (Frio and Sabinal).				Abundance has declined appreciably since 1975-1980, especially in the Sabinal River (Richardson and Gold 1995).	F = Decline of 10-30%	Trend over the past 10 years or three generations is uncertain but likely still declining.	Threatened by habitat alteration resulting from dewatering, overgrazing by cattle, and possible stream pollution from pesticides and other agricultural chemicals (Richardson and Gold 1995).	2 - Agriculture & aquaculture; 2.3 - Livestock farming & ranching; 7 - Natural system modifications; 7.2 - Dams & water management/use; 9 - Pollution; 9.3 - Agricultural & forestry effluents	Small range in the spring-fed Frio and Sabinal rivers in central Texas; abundance has declined appreciably over the past two decades; threatened by habitat alteration.			EN - Endangered	Vulnerable	1	0	0	0	0	0	0	0	1	1	0	1	negative 12 month finding in 2011 --Maria Papadopoulos	1	0	Krista Kemppinen
104428	Hydromantes brunus	Limestone Salamander	Amphibians	G2G3	G2	2013-05-17	2013-05-17	US	N2N3	N2	2013-05-17	CA (S2S3)	B = 6 - 20	This species is known from several scattered localities. On a coarse scale, Rovito (2010) mapped 8 localities, but as of 2009 the species is known from at least 15 sites (BLM, Mother Lode Field Office).	U = Unknown	Total adult population size is unknown but probably is at least several thousand and may exceed 10,000.	F = Decline of 10-30%	Likely relatively stable in extent of occurrence, probably less than 30 percent decline in population size, area of occurrence, and number/condition of occurrences, but better information is needed.	G = Relatively Stable (<=10% change)	Trend over the past 10 years or three generations is uncertain, but distribution and area of occupancy probably have been relatively stable.	This species appears to be in no immediate danger (Wake and Papenfuss 2005). A proposed gold mine operation in Hell Hollow poses the most serious threat; other potential threats include highway construction (e.g., widening of main access route into Yosemite National Park), quarrying for limestone (California Department of Fish and Game 1990), and impoundments that would inundate habitat.Climate c…	3 - Energy production & mining; 3.2 - Mining & quarrying; 4 - Transportation & service corridors; 4.1 - Roads & railroads; 7 - Natural system modifications; 7.2 - Dams & water management/use; 11 - Climate change & severe weather	Known from several scattered localities in one county in California; probably relatively stable and not in immediate danger, but vulnerable to habitat loss and degradation from mining, road construction, water development, or other human activities that may occur in the foreseeable future; probably vulnerable to population reductions resulting from habitat changes associated with climate change.			VU - Vulnerable		1	0	0	0	0	0	0	1	1	1	1	0	under review; positive 90 day finding in 2015	1	0	Krista Kemppinen
104448	Rhinichthys osculus ssp. 1	Amargosa Canyon Speckled Dace	Freshwater and Anadromous Fishes	G5T1Q	T1	2001-05-16	2007-09-25	US	N1	N1	2001-05-16	CA (S1)	A = 1 - 5		AC = 1 - 1000 individuals	During a 1981 survey of the Amargosa canyon speckled dace made up 1.3% of the fishes collected with introduced mosquitofish comprising 40.2%.					Could be negatively impacted by diversion of water from Willow Creek or by other alterations affecting water quality (Moyle et al. 1989).		Very small range in the Amargosa River and tributaries, California-Nevada.				Threatened	1	0	0	0	0	1	0	1	1	0	0	0	Krista Kemppinen: the Center petitioned to expand the Ash Meadows speckled dace (Rhinichthys osculus nevadensis) listing to include speckle dace in Amargosa Canyon (Center 2020). Moyle et al. (2023) clarified taxonomy, now Rhinichthys nevadensis nevadensis. Is a valid DPS of Desert Speckled Dace.	1	0	Krista Kemppinen
104823	Entosphenus tridentatus ssp. 1	Goose Lake Lamprey	Freshwater and Anadromous Fishes	G4T1	T1	1996-09-06	1996-09-06	US	N1	N1	1996-12-05	CA (S1), OR (S1)	A = 1 - 5		D = 1000 - 2500 individuals	Or C; numbers uncertain and highly variable.			F = Decline of 10-30%	Recent irrigation diversions, dams, culverts may have caused a modern decrease in numbers.	Probably negatively affected by dam and other obstructions that prevent adults from reaching spawning areas and by diversions of water for irrigation, which may cause ammocoete habitat to dry up or become unsuitable (Moyle et al. 1989).		Highly localized in Goose Lake and its tributaries, California and Oregon; primary spawning areas unknown; very little known of life history; entire lake could dry up in a severe drought; diversion of water from tributaries could adversely affect nursery areas.				Threatened	1	0	0	0	0	0	0	1	1	0	0	0		1	0	Noah Greewald
104855	Cottus asperrimus	Rough Sculpin	Freshwater and Anadromous Fishes	G2	G2	2014-09-22	2014-09-22	US	N2	N2	1996-12-05	CA (S2)	B = 6 - 20	This species is represented by several occurrences (subpopulations) in a small range. Sixteen occupied areas were found when the range was thoroughly surveyed by Moyle and Daniels (1982).	FG = 10,000 - 1,000,000 individuals	Total adult population size is unknown but presumably exceeds, 10,000. This species is abundant in its small range (Page and Burr 2011).			G = Relatively Stable (<=10% change)	Populations appeared to be stable as of 1990 (California Department of Fish and Game 1990). Moyle (2002) stated that the future of this species seems reasonably secure with continued protection.	Past management of streams for trout fishing was detrimental due to introduction of predatory brown trout and poisoning to eradicate nongame fish (Moyle 2002). Today, management of Fall River and Hat Creek for wild trout fisheries appears to favor sculpins (Moyle 2002). Hydroelectric development of the Fall and Pit rivers has destroyed or degraded some habitat, whereas a series of reservoirs seem…	7 - Natural system modifications; 7.2 - Dams & water management/use; 9 - Pollution; 9.3 - Agricultural & forestry effluents	Small range in streams in northern California; specialized habitat requirements; in need of continued efforts to maintain adequate flows and high water quality.			VU - Vulnerable	Vulnerable	1	0	0	0	0	0	0	0	1	0	0	0	Krista Kemppinen: This species is assessed as NT on the IUCN Red List (NatureServe 2014).	1	0	Krista Kemppinen
105186	Cyprinodon nevadensis shoshone	Shoshone Pupfish	Freshwater and Anadromous Fishes	G2T1	T1	2014-09-22	2014-09-22	US	N1	N1	1996-12-05	CA (S1)	A = 1 - 5	Occurs only in one location.		Previously considered extinct; rediscovered in 1986 (see A90CAS01NA for a discussion of the possible origins of these fishes). Observed in large numbers in 1986, but the population was down to about 20 by 1988. (B89MOY01NA). Most or all of the population was removed from the wild (B89MOY01NA) for propagation at UC Davis or UNLV. Some 72 individuals from UCD were released in pools constructed for …			F = Decline of 10-30%		Threatened by habitat alteration, including reduced instream flow and pollution (chlorinated outflow from Shoshone swimming pool flows directly into the habitat; also there is evidence of eutrophication in the spring outflow), and by predation by and/or competition with the large population of introduced mosquitofish (GAMBUSIA AFFINIS) (A90CAS01NA).		Confined to one site in southern California; very little original habitat left; severely low numbers, water pollution and diversion, and introduced exotics are major problems.				Endangered	1	0	0	0	1	1	0	0	1	0	0	0	CDFW species of concern; AFS endangered	1	0	Jeff Miller
104496	Taricha granulosa mazamae	Crater Lake Newt	Amphibians	G5T1Q	T1	1996-11-01	1996-11-01	US	N1	N1	1996-11-05	OR (S1)									The Crater Lake newt population is under threat due to predation from crayfish and rainbow trout that have been introduced into the lake (Girdner et al. 2017).	8 - Invasive & other problematic species, genes & diseases; 8.1 - Invasive non-native/alien species/diseases; 8.2 - Problematic native species/diseases						0	0	0	0	0	1	0	0	1	0	0	0	Subspecific designation not currently recognized, but may be a DPS.	1	0	Noah Greewald
104516	Laterallus jamaicensis coturniculus	California Black Rail	Birds	G3G4T1	T1	2014-11-12	2014-11-12	US	N1	N1	1997-03-19	AZ (S1), CA (S1)	A = 1 - 5	Probably there are about a half dozen scattered populations, but only one area (northern S.F. Bay area) with a substantial population.	E = 2500 - 10,000 individuals	As of the late 1980s, about 3300 individuals (80% of the total population) occurred in the northern part of the San Francisco Bay estuary in west-central California (Evens et al. 1991). (Eddinger et al. (1988) reported a population estimate for Arizona of 100-150 birds.			F = Decline of 10-30%		Major threat is loss and degradation of habitat; population is progressively declining due to loss of coastal salt marshes, inland freshwater marshes, and Colorado River marsh habitat (California Department of Fish and Game 1990, Evens et al. 1991). Perhaps negatively impacted by predation and by pesticides used in rice cultivation (Ehrlich et al. 1992). Eddleman et al. (1988) stated that threats…		Breeding populations are confined to a few remaining patches of habitat in central and southern California and western Arizona; has been declining due primarily to human-caused loss and degradation of marsh habitat.					1	0	1	0	0	0	0	0	1	0	0	0	Krista Kemppinen: other factors: wildfires	1	1	Krista Kemppinen
104533	Siphateles bicolor thalassinus	Goose Lake Tui Chub	Freshwater and Anadromous Fishes	G4T2T3	T2	2013-03-08	2013-03-08	US	N2N3	N2	2013-03-08	CA (S2), OR (S2)	B = 6 - 20	This species is represented by a moderate number of occurrences (subpopulations). Surveys in Oregon in 2007 found this tui chub in 25 localities. Considering also data from previous surveys going back to the early 1990s, this chub is widely distributed and occurs in at least a dozen relatively distinct stream areas in Oregon (see map in Heck et al. 2008).	FG = 10,000 - 1,000,000 individuals	At most times, chubs number in the hundreds of thousands (Moyle et al. 1989). The coded value reflects the variation that may occur as the lake varies from full to dry or excessively alkaline.	EF = Decline of 10-50%	Overall distribution probably has declined to an uncertain degree over the long term as a result of habitat loss and degradation. Abundance has undergone dramatic fluctuations with the size and alkalinity of Goose Lake. Goose Lake dried up in 1992 (and several times previously), but tui chubs survived in spring-fed pools of tributary streams and in reservoirs in Oregon (Moyle 2002).	U = Unknown	Trend over the past 10 years or three generations is unknown.	Potential threats include exotic fishes, decreased water quality caused by reduced inflows from tributary streams, and increased nutrients from agricultural runoff (Moyle et al. 1989). Climate change is likely to result in a reduction in habitat quantity and quality over coming decades."The principal threat to the Goose Lake tui chub is the loss of water in its principal habitat, Goose Lake, acco…	7 - Natural system modifications; 7.2 - Dams & water management/use; 8 - Invasive & other problematic species, genes & diseases; 11 - Climate change & severe weather; 11.2 - Droughts	Small range in Goose Lake and upper Pit River basins, California-Oregon; threatened by habitat loss and degradation from water diversions and drought and possibly by exotic species; distribution and conservation status are affected by taxonomic issues.				Threatened	1	0	0	0	0	1	0	1	1	0	0	0		1	0	Noah Greewald
104558	Oncorhynchus tshawytscha pop. 6	Chinook Salmon - Sacramento-San Joaquin River Spring Run	Freshwater and Anadromous Fishes	G5T1Q	T1	2001-05-16	2001-05-16	US	N1	N1	2001-05-21	CA (S1)	B = 6 - 20		AC = 1 - 1000 individuals	Populations are depleted throughout range, or are maintained by hatchery production (Moyle et al. 1989).			AE = Decline of >30%	Decline in Sacramento drainage probably began with early gold mining and water diversions for irrigation, accelerated following closure of Shasta Dam in the 1940s, which cut off access to spawning areas in the McCloud and upper Sacramento rivers; decline has continued in recent years. The native Feather River run also was extirpated by damming. Friant Dam, completed in 1948, had a negative impact…	Private diversions, based on long-held water rights, can prevent adults from reaching holding/spawning areas in dry years. Vulnerable to poaching when in prespawning summer habitat; adults disappear from sites with easy access (B89MOY01NA). Swimmers and gold dredgers may cause adults to leave their summer holding pools. Out-migrating juveniles require adequate flows to make it to the ocean.		Large recent declines; restricted breeding range; potential for private landowners to severely impact a spawning year through water diversions; difficulty in managing nonriverine mortality; vulnerable to poaching.					1	0	0	0	1	0	0	1	1	0	0	0	Designated as experimental population 12/31/13	1	1	Jeff Miller
104698	Cyprinodon pecosensis	Pecos Pupfish	Freshwater and Anadromous Fishes	G2	G2	2011-11-22	2011-11-22	US	N2	N2	2011-11-22	NM (S1), TX (S1)	A = 1 - 5	This species is represented by several unhybridized populations.	F = 10,000 - 100,000 individuals	Total adult population size is unknown but presumably exceeds 10,000.	D = Decline of 50-70%	This species has been replaced by C. pecosensis x C. variegatus hybrids throughout more than two-thirds of historical range (USFWS 1998).	G = Relatively Stable (<=10% change)	Recent management has stopped the decline and may reverse it (USFWS 2000).	In the late 1990s, the main threats to the Pecos pupfish were habitat loss caused by damming and dewatering of the Pecos River, excessive pumping of groundwater, and, since the early 1980s, hybridization with the sheepshead minnow (Cyprinodon variegatus). Subsequently, USFWS, BLM, New Mexico Department of Game and Fish, New Mexico Department of Agriculture, New Mexico Division of State Parks, and…	7 - Natural system modifications; 7.2 - Dams & water management/use; 8 - Invasive & other problematic species, genes & diseases; 8.1 - Invasive non-native/alien species/diseases	Restricted to small areas in New Mexico and Texas; current range is much less than historical range; recent management and a conservation agreement have reduced threats (security of exisiting populations, hybridization with introduced Cyprinodon variegatus) and stopped a severe population decline.			VU - Vulnerable	Endangered	1	0	1	0	0	1	0	0	1	1	1	0	Krista Kemppinen: The natureserve conservation status factors edition date is more recent than the global status last reviewed date. Therefore used online version. Other factors: river flooding	1	1	Krista Kemppinen
104724	Archoplites interruptus	Sacramento Perch	Freshwater and Anadromous Fishes	G2G3	G2	2011-10-20	2011-10-20	US	N2N3	N2	2011-10-20	AZ (SNA), CA (S1), CO (SNA), NE (SNA), NV (SNA), OR (SNA), UT (SNA)	A = 1 - 5	This species is represented by only a couple remaining native populations, plus several introduced populations that may be reasonably secure (Moyle 2002). Most introduced pond and reservoir populations are not expected to persist over the long term because of changing conditions (Moyle 20020.	U = Unknown	Historically this fish was quite abundant. Remaining native populations are small. No reliable population estimates are available.	A = Decline of >90%	This species has been eliminated from more than 90 percent of the native range.	FG = Decline of <30% to relatively stable	Only two native populations are maintaining themselves (tenuously); of the introduced populations, those in the upper Klamath watershed, Pyramid Lake (Nevada), lower Walker River, and Owens River are reasonably secure; most pond and reservoir populations will not persist indefinitely (Moyle 2002).	Formerly this fish was widespread and abundant in California, but the population declined rapidly probably due to factors such as habitat destruction, egg predation by non-native fishes, and interspecific competition with introduced centrarchids, especially black crappie; competition may be the most important cause of the decline (Moyle 1976, 2002). Most introduced populations are isolated and vu…	7 - Natural system modifications; 7.2 - Dams & water management/use; 8 - Invasive & other problematic species, genes & diseases; 8.1 - Invasive non-native/alien species/diseases	Formerly widely distributed and common in much of California; now restricted to just a couple remaining native populations in California, which are small but persistent; native habitat is dominated by introduced species, which threaten Sacramento perch through competition and predation; reasonably secure in several watersheds outside native range. Based on native populations, rank would be G1 (G2…			EN - Endangered	Threatened	1	0	0	0	0	1	0	0	1	0	0	0		1	0	Noah Greewald
104811	Siphateles bicolor eurysoma	Sheldon Tui Chub	Fishes - Freshwater and Anadromous Bony, Cartilagi	G4T2	T2	2021-08-02	2021-08-22	US	N1	N1	1996-12-05	NV (S1), OR (S1)	B = 6 - 20	This species is known from 9 occurrences, although more may exist on private lands where surveys have not taken place.	U = Unknown		U = Unknown		U = Unknown	The short-term trend is unknown. Many of the populations in Oregon reside on private lands where access for survey work has been denied. Populations in Nevada have not recently been surveyed (as of 2021).	The greatest threat to this species is loss of habitat due to diversion and water withdrawals for livestock operations, trampling by feral horses and burros, persistent drought, and introduced nonnative fishes. Although little is known as to the effects of non-native fishes, the Alvord Chub which occurs in the neighboring drainage has warm-water game fish and the guppy (Poecilia reticulata) as pr…	2 - Agriculture & aquaculture; 2.3 - Livestock farming & ranching; 7 - Natural system modifications; 7.2 - Dams & water management/use; 8 - Invasive & other problematic species, genes & diseases; 8.1 - Invasive non-native/alien species/diseases; 11 - Climate change & severe weather	This species is restricted to a few isolated populations over a small area where it is subject to ongoing threats from water extraction, feral horses and burros, non-native fishes, and droughts.				Endangered	1	0	0	0	0	1	0	1	1	0	0	0		1	0	Noah Greewald
104843	Etheostoma pseudovulatum	Egg-mimic Darter	Freshwater and Anadromous Fishes	G1	G1	1998-08-03	2011-12-30	US	N1	N1	1996-09-05	TN (S1)	B = 6 - 20	The number of occurrences has not been determined using standardized criteria, but each of the five occupied tributaries of the Duck River in Tennessee (Page et al. 1992, Ceas and Page 1995) could be regarded as a distinct occurrence. Tennessee Valley Authority (TVA) records encompass 9 sites in 7 streams (Amy Kristen Wales, pers. comm., 2009).Historically the species was collected from 26 sites …	E = 2500 - 10,000 individuals	Page et al. (1992) stated that the species is fairly common in its range, and Page (pers. comm., 1998) estimated the population size as over 3,000 individuals. Page and Burr (2011) characterized this species as "common in small range."Population sizes can vary from large in some localities to very small with restricted ranges in other localities (Shute et al.). During a 1994-1995 survey concentra…	FG = Decline of <30% to relatively stable	Trend information is not available (Larry Page, pers. comm., 1998), but probably the extent of occurrence, area of occupancy, number of subpopulations, and population stable have been relatively stable over the long term. Surveys in the 1990s yielded no indication of extirpations of historical populations.	G = Relatively Stable (<=10% change)		Impoundments or activities that result in habitat modification or pollution could eliminate a unique population (Page et al. 1992, Ceas and Page 1995). Gravel mining operations may jeopardize some populations (Shute et al.). Bedload removal for gravel appears to be a common practice in the Beaverdam Creek system (Ceas and Page 1995). According to Ceas and Page (1995), some small, isolated populat…	2 - Agriculture & aquaculture; 2.1 - Annual & perennial non-timber crops; 3 - Energy production & mining; 3.2 - Mining & quarrying; 7 - Natural system modifications; 7.2 - Dams & water management/use; 8 - Invasive & other problematic species, genes & diseases; 8.1 - Invasive non-native/alien species/diseases; 9 - Pollution; 9.1 - Domestic & urban waste water; 9.3 - Agricultural & forestry effluen…	Extremely small range in several tributary systems of the Duck River drainage, Tennessee; fairly common, but small localized populations are highly vulnerable to extirpation; potential threats include impoundments and other stream modifications; no protected populations. Rank needs further review; NatureServe rank calculator version 6.2 yielded a rank of G2 or G3, depending on values selected for…			VU - Vulnerable	Threatened	1	0	0	0	0	0	1	0	1	1	1	0	positive 90 day in 2011 --Maria Papadopoulos	1	0	Will Harlan
104866	Lithobates tarahumarae	Tarahumara Frog	Amphibians	G1G3	G2	2017-12-07	2017-12-07	US	NX	NX	2017-12-07	AZ (SX,S1), AZ (SX,S1)	C = 21 - 80	Known from about 70 localities (Rorabaugh and Humphrey 2002, Rorabaugh 2013). From 1974-1986 most known and probable localities were surveyed; 42 populations including 5 in Arizona and 37 in Mexico were repeatedly visited; by the mid-1980s all Arizona populations and 3 Mexican populations were extirpated. As of the mid-1980s, 34 healthy, reproductively active populations occurred in isolated pock…	U = Unknown		E = Decline of 30-50%	Numbers declined seriously in the late 1970s; last individual known in Arizona was found dead in the Santa Ritas in 1983 (Arizona Game and Fish Dept. 1996). Two of the five extirpated Arizona populations were healthy and reproducing only a decade earlier. By the mid-1980s at least four of nine populations were extirpated from Sonora; approximately 60% of the southern historical range in Sonora re…	AE = Decline of >30%	Rorabaugh (2013) details population declines and reintroduction efforts up through 2013 (https://tucsonherpsociety.org/inhabitants/tarahumara-frog/).	Populations have declined and gone extinct throughout historical range. Cause of the extirpations is thought to be due to one or more of the following: exposure to heavy metal poisoning (particularly cadmium and other agents); stream acidification; severe drought; flooding; introduced predaceous fish (green sunfish and bluegill) and bullfrogs (now apparently replaced by the bullfrog in the Pena B…	2 - Agriculture & aquaculture; 2.1 - Annual & perennial non-timber crops; 7 - Natural system modifications; 7.1 - Fire & fire suppression; 7.1.1 - Increase in fire frequency/intensity; 8 - Invasive & other problematic species, genes & diseases; 8.1 - Invasive non-native/alien species/diseases; 9 - Pollution; 9.2 - Industrial & military effluents; 9.3 - Agricultural & forestry effluents; 9.5 - Air…	Known from southern Arizona (extirpated by 1983, reestablished populations have disappeared or remain highly vulnerable) and northwestern Mexico (some healthy populations still remain); cause of decline is uncertain, likely related to at least in part to chytridiomycosis (fungal disease). Heavy metal pollutants, stream acidification, exotic predators, severe drought, climate change, consequent fl…			VU - Vulnerable		1	0	1	0	0	1	0	1	1	0	0	0	Krista Kemppinen: other factors: severe drought, winter cold.	1	1	Krista Kemppinen
104903	Catostomus sp. 3	Little Colorado Sucker	Freshwater and Anadromous Fishes	G1	G1	2018-01-11	2018-01-11	US	N2	N2	1996-09-05	AZ (S2)	C = 21 - 80	Occurrence map from Arizona Heritage Data Management system, 2006.	U = Unknown		AF = Decline of >10%	Little Colorado River Sucker (Catostomus sp. 3) was more common and abundant throughout its limited, historical range within the Little Colorado River watershed (Conservation Agreement 2006).	F = Decline of 10-30%	Has experienced range reductions over the last decades (Conservation Agreement 2006).	Key threats identified include: groundwater depletion and springhead use, water diversions and water catchments, altered river flow regimes, habitat fragmentation and barriers, management for sport fish, streambank alteration and channelization, dams/reservoirs/impoundments, bait-bucket dumping and illegal introductions of non-native fish, introgression with non-native fish, livestock overgrazing…	2 - Agriculture & aquaculture; 2.3 - Livestock farming & ranching; 7 - Natural system modifications; 7.2 - Dams & water management/use; 7.2.8 - Abstraction of ground water (unknown use); 8 - Invasive & other problematic species, genes & diseases; 8.1 - Invasive non-native/alien species/diseases; 11 - Climate change & severe weather	Common in small, historical range in the upper Little Colorado River system, Arizona. Population abundance and range has declined over last decades (Conservation Agreement 2006). Faces suite of threats from water depletion and habitat degredation, introduction of non-native fish, and climate change.				Vulnerable	1	0	1	0	0	1	0	1	1	0	0	0	Krista Kemppinen: ranked as G1 by NatureServe in 2018. Other factors: management for sportfish. Climate change threat: specific	1	1	Krista Kemppinen
104925	Onychomys torridus tularensis	Tulare Grasshopper Mouse	Mammals	G5T1T2	T1	2014-08-05	2014-08-05	US	N2	N2	2013-02-22	CA (S1S2)	B = 6 - 20	The number of extant occurrences has not been determined using standardized criteria, but there are at least several. This subspecies is represented by several dozen collection sites, many of which are not recent.	U = Unknown	Total adult population size is This subspecies is apparently widespread in the San Joaquin Valley, but it is nowhere locally abundant and regarded as quite rare (Williams and Kilburn 1992, Hafner et al. 1998).	AD = Decline of >50%	Based on habitat loss, this mouse undoubtedly has experienced a major long-term decline in distribution and abundance, but the precise degree of decline is uncertain.	FG = Decline of <30% to relatively stable	Trend over the past 10 years or 3 generations is unknown but probably relatively stable or slowly declining. Three generations span fewer than 10 years.	Habitat loss and fragmentation associated with agricultural development are the most serious threats (Williams and Kilburn 1992, Collins 1998, Hafner et al. 1998). The low fecundity, low population density, and large home range characteristic of grasshopper mice (McCarty 1975) suggest that the remaining populations are particularly vulnerable to loss and fragmentation of habitat (Williams and Kil…	2 - Agriculture & aquaculture; 2.1 - Annual & perennial non-timber crops; 9 - Pollution; 9.5 - Air-borne pollutants; 11 - Climate change & severe weather; 11.2 - Droughts	Restricted to the San Joaquin Valley, California; where widespread but nowhere locally abundant; trend poorly known; threatened by habitat loss and fragmentation, and possibly by negative effects of agricultural pesticide use..			DD - Data deficient		1	0	0	0	0	0	0	1	1	0	0	0		1	1	Jeff Miller
105058	Catostomus sp. 4	Salish Sucker	Freshwater and Anadromous Fishes	G1	G1	1996-09-19	2011-06-22	US	N1	N1	1996-12-05	WA (S1), BC (S1)	B = 6 - 20	This fish is represented by at least 14 known extant occurrences (10 in British Columbia and at least 4 in Washington (Recovery Team for Salish Sucker 2010). Occurrences are essentially isolated from one another, with low probability of natural exchange of individuals among watersheds (Recovery Team for Salish Sucker 2010).	E = 2500 - 10,000 individuals	Population in Canada is thought to include 500 to a few thousand individuals (COSEWIC 2002), but COSEWIC (2002) also reported "1500 to 5000 in each of the sampled creeks, other creeks likely have fewer."	E = Decline of 30-50%		F = Decline of 10-30%	Declining, perhaps rapidly, in British Columbia streams. McPhail (1986) stated that it is "destined for extinction in British Columbia." This fish has been declining in British Columbia since at least the 1960s, and perhaps much longer (McPhail 1987). Since the 1960s, much of the remaining habitat in British Columbia has been degraded (Pearson and Healey 2003). Probably stable at the known sites …	Jelks et al. (2008) rated this species as Endangered, based on present or threatened destruction, modification, or reduction of the habitat or range, in combination with a narrowly restricted range.This fish is endangered in British Columbia streams because of habitat loss and degradation from urbanization, urban and agricultural pollution, and sedimentation from gravel mining. "Summer water temp…		Restricted to portions of Washington and British Columbia; several extant occurrences, but declining in many or most sites due to habitat loss and degradation.				Endangered	1	0	0	0	0	0	0	1	1	0	0	0		1	0	Noah Greewald
105092	Graptemys barbouri	Barbour's Map Turtle	Turtles	G2	G2	1996-10-21	2014-02-25	US	N2	N2	1996-10-05	AL (S2), FL (S2), GA (S3)	AB = 1 - 20	Estimate somewhat arbitrary. Difficult to distinguish EOs, as potentially all individuals within a river system represent an interbreeding population.	DE = 1000 - 10,000 individuals	Total adult population size is unknown but likely is at least a few thousand. Fairly abundant in parts of range, scarce in others. Considered relatively common in Apalachicola, Flint, and Chipola rivers (> 12 turtles per mile where surveyed), less so in Chattahoochee. Apparently can persist in impoundments.	EH = Decline of <50% to increase of <25%		FG = Decline of <30% to relatively stable	Decline in Florida has been suggested but is undocumented; data more strongly suggest a decline in Georgia (P. Moler, pers. comm., 1995).	Habitat modification such as channelization, dredging, and pollution threaten both the turtle and the invertebrate (especially molluscan) fauna on which it feeds. Also threatened by barge traffic, human consumption, and collection for pet trade (despite some legal restrictions). Parts of the Flint River population (e.g., Lake Blackshear) are affected by a disease condition, sometimes fatal, of un…	4 - Transportation & service corridors; 4.3 - Shipping lanes; 5 - Biological resource use; 5.1 - Hunting & collecting terrestrial animals; 7 - Natural system modifications; 7.2 - Dams & water management/use; 9 - Pollution; 9.3 - Agricultural & forestry effluents	Restricted principally to a single river system (Apalachicola) subject to multiple threats, particularly dredging, impoundment, water withdrawal, and pollution.			VU - Vulnerable		1	1	1	0	0	0	1	1	1	0	0	0		1	0	Will Harlan
105135	Sigmodon hispidus exsputus	Lower Keys Cotton Rat	Mammals	G5T2	T2	1996-11-12	1998-04-03	US	N2	N2	1996-09-05	FL (S2)	B = 6 - 20	EOs are found throughout most of range, on several Keys.		Number of individuals unknown. In general, population density is approximately 10-12 per acre.					Development (habitat destruction, dredge and fill, etc.) is the major threat; herbicide and pesticide use pose potential threat.		Very small range in the Florida Keys; small number of occurrences in an area that is undergoing rapid development; most occurrences are unprotected, and those that are would not be considered "good occurrences."					1	0	0	1	1	0	0	1	1	0	0	0		1	0	Will Harlan
105161	Clonophis kirtlandii	Kirtland's Snake	Reptiles	G2	G2	2001-09-12	2018-02-01	US	N2	N2	1996-10-05	IL (S2), IN (S2), KY (S2), MI (S1), MO (S1), OH (S2), PA (SH), TN (S1), WI (SNA)	B = 6 - 20	No estimates are available. However, given individuals likely have a small home range, and grouping adjacent counties that have recent records of Kirtland's snake, and assuming intervening counties without records are not false-negatives, there are approximately 15 - 20 populations.	DF = 1000 - 100,000 individuals	Total adult population size is unknown but likely is at least a few thousand. No population ecology or viability studies of Kirtland’s snake are available (Gibson and Kingsbury 2004, USFWS 2017). There are a total of 415 Kirtland’s snake records, with 194 classified as “extant” (USFWS 2017).	D = Decline of 50-70%	Based on an evaluation of historic records (USFWS 2017), 43% of the historical county records for the Kirtland’s snake have had records from the past 15 years. Of the 194 extant records, 40 are documented by a single individual snake in a single year (USFWS 2017).	F = Decline of 10-30%	Trend over the past 10 years or 3 generations is uncertain. Although new occurrences have been documented, the species is rare and likely declining. Local populations can be dense (Harding 1997, Gibson and Kingsbury 2004), but because dispersal distances are likely short for this species, populations are localized and disparate.	From USFWS (2017):Habitat Loss and Modification: Habitat loss, modifications, and degradation is occurring throughout the Kirtland’s snake range, and it is the most common stressor, with urbanization (Bavetz 1994; Edgren 2000; Minton et al. 1982) and wetland modification (Wilsmann &amp; Sellers 1988) most commonly reported. Habitat fragmentation can lead to population isolation, which is cited as…	1 - Residential & commercial development; 1.1 - Housing & urban areas; 1.2 - Commercial & industrial areas; 2 - Agriculture & aquaculture; 2.1 - Annual & perennial non-timber crops; 2.3 - Livestock farming & ranching; 4 - Transportation & service corridors; 4.1 - Roads & railroads; 5 - Biological resource use; 5.1 - Hunting & collecting terrestrial animals; 5.4 - Fishing & harvesting aquatic reso…	Confined to the Midwestern United States, with the range centered in Illinois, Indiana, and Ohio; distribution and abundance have declined due to loss of prairie wetland habitat; rare and local throughout range; little suitable habitat remains, and most of this is subject to human alteration.			NT - Near threatened		1	1	1	0	0	0	1	0	1	0	0	0		1	0	Will Harlan
105176	Oncorhynchus tshawytscha pop. 13	Chinook Salmon - Central Valley Fall/Late Fall Run	Freshwater and Anadromous Fishes	G5T2T3Q	T2	1999-10-13	1999-10-13	US	N2N3	N2	1999-10-13	CA (S2)			FH = 10,000 to >1,000,000 individuals	Natural spawning abundance is high (190,000 natural spawners for the Sacramento River basin) (NMFS 1999).			HI = Increase of >10%	Numerous streams exhibited increases during the 1990s, including tributaries of the San Joaquin River (NMFS 1999).	Major sources of continued threats are habitat degradation (primarily water withdrawals and stream shifts), reduced water quality, loss of riparian and estuarine habitat, and the influence of hatchery fishes (NMFS 1999). NMFS is concerned about the high variation in abundance and its strong correspondence with human- and naturally impacted flow regimes in the San Joaquin River drainage.	2 - Agriculture & aquaculture; 2.1 - Annual & perennial non-timber crops; 7 - Natural system modifications; 7.2 - Dams & water management/use; 8 - Invasive & other problematic species, genes & diseases; 8.3 - Introduced genetic material; 9 - Pollution	Spawns in streams of the Sacramento and Joaquin river systems in California; more than 190,000 naturally spawning individuals; increasing in abundance in many streams; threatened by habitat degradation (primarily water withdrawals and stream shifts), reduced water quality, loss of riparian and estuarine habitat, and the detrimental impacts of hatchery fishes.				Vulnerable	1	0	0	0	0	0	0	1	1	0	0	0		1	1	Jeff Miller
105234	Perognathus longimembris bangsi	Palm Springs Little Pocket Mouse	Mammals	G5T2	T2	2020-11-16	2020-11-16	US	N2	N2	2001-06-01	CA (S1)	A = 1 - 5	Several Palm Springs little pocket mouse occurrences are scattered and clustered within the taxon's range.	U = Unknown		C = Decline of 70-80%	Historical habitat loss and degradation have resulted in substantial range contraction and created fragmented Palm Springs pocket mouse distribution.	F = Decline of 10-30%	Habitat loss continues but significant conservation efforts are either in place or planned under binding agreements that would promote stabilization of the Palm Springs little pocket mouse populations.	While the primary threat of habitat loss resulting from conversion of habitat to urban and commercial development remains, some occurrences are within the protected Anzo-Borrego State Park and the Coachella Valley Multiple Species Habitat Conservation Plan (CVMSHCP) proposes to conserve about 23,018 hectares (ha) (56,856 ac) in the CVMSHCP reserve system, including 11,228 ha (27,734 ac) in five c…	Unknown/undetermined; 1 - Residential & commercial development; 1.1 - Housing & urban areas	This taxon has lost three quarters of its historical range and persists in a small number of occurrences. While threats to Palm Springs little pocket mouse populations remain, there are proposed conservation actions that would provide population stability and create core conservation areas.					1	0	0	0	1	0	0	0	1	0	0	0		1	0	Jeff Miller
105313	Tantilla oolitica	Rim Rock Crowned Snake	Reptiles	G1G2	G1	1996-10-30	2014-03-05	US	N1N2	N1	1996-10-05	FL (S1S2)	B = 6 - 20	This species is represented by a relatively small number of known occurrences (subpopulations) (Telford 1980, Campbell and Moler 1992, Hines 2011).	DF = 1000 - 100,000 individuals	Adult population size is unknown but presumably is at least a few thousand (Tantilla usually are more numerous than available records indicate). However, very few individuals of this species have ever been found.	BE = Decline of 30-90%	Area of occupancy, number of subpopulations, and population size probably have declined significantly from historic levels. Worst declines would have been on mainland, though there undoubtedly has been substantial decline in the Keys as well.	EF = Decline of 10-50%	Currently, remaining populations on private lands are declining or deteriorating in quality as very rapid loss of habitat continues. Populations on conservation lands likely are more stable.	Biggest threat is habitat loss and fragmentation from development (Lazell 1989, Campbell and Moler 1992). Rapid and intense habitat modification has occurred (and continues) within the Miami-Key Largo area. Apparently this species can withstand limited human incursion and can survive in somewhat altered habitat.	1 - Residential & commercial development; 1.1 - Housing & urban areas; 1.2 - Commercial & industrial areas; 1.3 - Tourism & recreation areas	Extremely limited range in southern Florida, where intensive development and other disturbances (e.g., alteration of natural hydrological and fire regimes) threaten the existence of many populations. In some sites, the current pace of development may eliminate even marginal habitat.			EN - Endangered		1	0	0	0	1	0	0	0	1	1	1	0	positive 90 day finding in 2015 --Maria Papadopoulos	1	0	Will Harlan
105336	Ophisaurus mimicus	Mimic Glass Lizard	Reptiles	G2	G2	2023-08-24	2023-08-24	US	N2	N2	1996-10-05	AL (S1), FL (S1S2), GA (S1), MS (SH), NC (S1), SC (S1)	B = 6 - 20	Records (not all representing extant populations) are known from six sites in four counties in Alabama, but only one public land unit (Conecuh National Forest); 63 sites in nine counties in Florida, including Apalachicola National Forest, Eglin Air Force Base, Holley Naval Outlying Landing Field, Tate's Hell State Forest, Blackwater River State Forest, and St. Marks National Wildlife Refuge; nine…		Information on population size is not available.	DE = Decline of 30-70%	Area of occupancy and abundance have undoubtedly undergone significant long-term declines (Stevenson et al. 2023).		Data are insufficient to determine short-term trend.	Extensive habitat loss and alteration have led to extirpation of many historic populations, resulting in severe range fragmentation; surviving populations may be restricted to the Florida Panhandle, adjacent southern Alabama, and coastal southeastern North Carolina (Stevenson et al. 2023). Threats include habitat loss to development, farming, conversion of habitat to pine plantations, and hardwoo…	1 - Residential & commercial development; 1.1 - Housing & urban areas; 1.2 - Commercial & industrial areas; 2 - Agriculture & aquaculture; 2.1 - Annual & perennial non-timber crops; 2.2 - Wood & pulp plantations; 4 - Transportation & service corridors; 4.1 - Roads & railroads; 7 - Natural system modifications; 7.1 - Fire & fire suppression; 7.1.2 - Suppression in fire frequency/intensity; 8 - Inv…	A comparison of historic records with those since 2000 indicate a substantial decline in occupied portions of the range. The major threat appears to be loss and degradation of open pineland habitats with grassy groundcover, a result of conversion to agriculture, silviculture, and residential and industrial development, as well as hardwood and shrub encroachment from fire exclusion. Additional thr…			LC		1	0	0	0	0	0	1	0	1	0	0	0		1	0	Noah Greewald
105522	Pantherophis guttatus pop. 1	Red Rat Snake, Lower Keys Population	Reptiles	G5T2Q	T2	2002-07-09	2014-02-26	US	N2	N2	1996-10-05	FL (S2)	B = 6 - 20	Known from more than a dozen islands in the Florida Keys.	DF = 1000 - 100,000 individuals	Seems to be locally abundant on some islands.	EH = Decline of <50% to increase of <25%	Populations undoubtedly diminished at sites that were totally converted to human uses devoid of vegetation.	G = Relatively Stable (<=10% change)	Because of its adaptability to edificarian situations, the population appears to be relatively stable and potentially better insulated from further decline than some other Keys wildlife.	Continued habitat losses are of concern despite the species' adaptability to surviving in modified sitations. Rising sea levels resulting from global warming are expected to reduce and eliminate substantial areas of habitat in the Keys. Potential collection pressure for the pet trade may occur despite state regulations.		Relatively few occurrences in a very small and disjunct region in extreme southern Florida, an area in which much of the natural habitat has been lost or is threatened by development. Potentially exacerbated by threat of collection for the pet trade. Ability to adapt to residentially developed areas allows ranking as 2 rather than 1.					1	1	1	0	0	1	0	1	1	0	0	0		1	0	Will Harlan
105558	Pseudemys nelsoni pop. 1	Florida Red-bellied Turtle, Panhandle Population	Turtles	G5T2Q	T2	2002-03-06	2014-03-04	US	N2	N2	2001-11-21	FL (S2)	AB = 1 - 20	Fewer than 10 known occurrences.	CD = 250 - 2500 individuals	Small numbers where known, though no quantitative data are available.	U = Unknown	No data.	U = Unknown	No data.	Drought, often accompanied by predation, may extirpate nonriverine populations. Though now illegal, some individuals in the past were harvested as food by turtle trappers (in conjunction with other species such as river cooters). Locally, predators can have severe effects, especially on small or stressed populations. Raccoons prey both on turtles and eggs; fish crows depredate nests.		Known from fewer than six occurrences in one relatively small area; disjunct from main population of species. Local populations may be small.					1	0	1	0	1	0	0	1	1	0	0	0		1	0	Will Harlan
105581	Etheostoma striatulum	Striated Darter	Freshwater and Anadromous Fishes	G1	G1	1996-09-24	2012-01-23	US	N1	N1	1996-12-05	TN (S1)	B = 6 - 20	Of 28 known collection localities, Burr et al. (1993) found the species in 10 locations representing probably 9 distinct subpopulations. Etnier and Starnes (1993) reported that this species occurs in fewer than a dozen creeks.	U = Unknown	Total adult population size is unknown. Reported to be generally rare by Page (1980) and Page and Burr (2011); uncommon (Etnier and Starnes 1993).	D = Decline of 50-70%	Etnier and Starnes (1993) reported that efforts to collect this species in four of the fewer than a dozen creeks from which the species is known were not successful. Burr et al. (1993) found this species in only 10 of the 28 historical collection localities.	FG = Decline of <30% to relatively stable	Current trend is not definitely known, but habitat extent and quality probably are still declining.	Habitat degradation resulting from agricultural practices pose the greatest threat to this species. Cattle manure being dropped directly into streams is causing severe oxygen depletion. Siltation from nonpoint agricultural sources also is a problem (D. Etnier, pers. comm., 1995).	2 - Agriculture & aquaculture; 2.3 - Livestock farming & ranching; 9 - Pollution; 9.3 - Agricultural & forestry effluents; 9.4 - Garbage & solid waste	Known from several small tributaries of the Duck River in Tennessee; threatened by habitat degradation resulting from agricultural practices.			VU - Vulnerable	Threatened	1	0	0	0	0	0	0	0	1	1	1	0	positive 90 day finding in 2011 --Maria Papadopoulos	1	0	Will Harlan
105585	Gila orcuttii	Arroyo Chub	Freshwater and Anadromous Fishes	G2	G2	2001-05-16	2012-02-09	US	N2	N2	2001-05-16	CA (S2)	B = 6 - 20	This species is represented by at least 7 native populations and several additional populations outside the native range (Moyle 2002).	E = 2500 - 10,000 individuals	Total adult population size is unknown but may not exceed 10,000. Within the native range, the species is common at only four locations.		If not for introductions outside the native range, this species likely would be listed as endangered or threatened (Moyle 2002).	F = Decline of 10-30%	Trend over the past 10 years or three generations is uncertain, but distribution and abundance probably are declining. Three generations does not exceed 10 years. Continued habitat degradation and hybridization with other species is only accelerating the decline of this species.	Most streams in the native range are degraded as a result of their location in the Los Angeles metropolitan area, and chub populations are fragmented and reduced, especially in the low-gradient reaches that were optimal habitat (see Moyle 2002). Some introduced populations (e.g., those in the Cuyama and Mohave rivers) have been negatively impacted by hybridization with other cyprinids and cannot …	1 - Residential & commercial development; 1.1 - Housing & urban areas; 1.2 - Commercial & industrial areas; 7 - Natural system modifications; 7.2 - Dams & water management/use; 8 - Invasive & other problematic species, genes & diseases; 8.1 - Invasive non-native/alien species/diseases	Small range in southern California coastal drainages; range and abundance have been reduced by habitat degradation associated with urbanization and impacts of non-native fish species (ogoing threats) introductions outside the native range have improved the status somewhat, but some introduced populations have been negatively impacted by hybridization.			VU - Vulnerable	Vulnerable	1	0	0	0	0	1	0	0	1	0	0	0		1	0	Krista Kemppinen
105595	Entosphenus folletti	Modoc Brook Lamprey	Fishes - Freshwater and Anadromous Bony, Cartilagi	G1G2	G1	2018-12-03	2018-12-03	US	N1N2	N1	1996-12-05	CA (S1S2)	A = 1 - 5	Documented occurrences are from specimens collected in the 1950s-1970s.	D = 1000 - 2500 individuals	Exact adult population size is unknown.	U = Unknown		U = Unknown		Restricted range has been severely modified by dams, diversions, and pollution (Moyle et al. 1989). Genetic isolation due to major dams, and habitat degradation due primarily to grazing and agriculture are primary threats.	2 - Agriculture & aquaculture; 7 - Natural system modifications; 9 - Pollution	Very small range (Willow Creek and the Lost River, Klamath River drainage, Modoc County, California) is highly modified. There is limited information available to assess status and trends.					1	0	0	0	1	0	0	0	1	0	0	0	Krista Kemppinen: this species was ranked as G1 in 2018 (NatureServe 2018).	1	0	Krista Kemppinen
105673	Eurycea junaluska	Junaluska Salamander	Amphibians	G2G3	G2	2019-06-26	2019-06-26	US	N2N3	N2	2001-10-18	NC (S1), TN (S2)	B = 6 - 20	Available survey data indicate that this species is extant in 17 streams (USFWS 1999).	DE = 1000 - 10,000 individuals	A reliable estimate of population size cannot be made (Bruce and Ryan 1995). This salamander is rare or at least hard to find, even where known to be present (Ryan 1997). Natural heritage programs estimated abundance at fewer than 1000 individuals in the Great Smoky Mountain National Park (Dana Soehn, pers. comm., 1998) and occupied habitat in North Carolina at 10-15 miles of stream (Harry LeGran…	EG = Decline of <50% to Relatively Stable	No solid direct evidence exists of any population declines; no populations are known to have been lost since the species was described (USFWS 1999), but Ryan and Sever (2005) stated that the population at the type locality on the Cheoah River may be extirpated and that the species has not been collected at Snowbird Creek since 1994. Ryan (1997) suggested that E. junaluska may have occupied a more…	FG = Decline of <30% to relatively stable	Recent trend is unknown, but habitat considerations suggest that extent of occurrence, area of occupancy, number of subpopulations, and abundance probably are not declining at a rate of more than 10% over 10 years or three generations.	Potential threats include siltation due to logging, road construction for logging activities, urban development, and other activities that would negatively impact water quality (Braswell 1989; Harry LeGrand and Rusty Smith, pers. comm., 1998). Ranavirus has been found in wild populations of congeners (Gray et al. 2009, Rothermel et al. 2013, Sutton et al. 2015) and Bd chytrid fungus has shown neg…	4 - Transportation & service corridors; 4.1 - Roads & railroads; 5 - Biological resource use; 5.1 - Hunting & collecting terrestrial animals; 5.3 - Logging & wood harvesting; 7 - Natural system modifications; 7.2 - Dams & water management/use; 8 - Invasive & other problematic species, genes & diseases; 8.2 - Problematic native species/diseases; 9 - Pollution; 9.1 - Domestic & urban waste water; 9…	Small range in North Carolina and Tennessee; extant in 17 streams. No population declines have been documented. Narrow habitat requirements are threatened by anthropogenic activities.			VU		1	0	1	0	0	0	0	1	1	0	0	0		1	0	Noah Greewald
105821	Entosphenus hubbsi	Kern Brook Lamprey	Freshwater and Anadromous Fishes	G1G2	G1	2014-09-22	2014-09-22	US	N1N2	N1	1996-12-05	CA (S1S2)	B = 6 - 20	This species is represented by relatively few occurrences (subpopulations). Moyle (2002) mentioned only four rivers in which the species has been found. The California Fish Website (University of California) listed 8 watersheds for this species.	U = Unknown	Sites have not been adequately surveyed, so abundance is unknown.	AF = Decline of >10%	Likely has declined proportionally with habitat loss, degradation, and fragmentation.	U = Unknown	Trend over the past 10 years or three generations is uncertain, but distribution and abundance probably are declining.	Most populations are below dams, in regulated streams, where sudden drops in flow may isolate or desiccate ammocetes (Moyle 2002). Immediate threats include damming and other alterations (e.g., channelization or bank modifications) that reduce silt-laden backwaters required by ammocoetes (Moyle et al. 1989, Moyle 2002). Ammocoetes and adult lampreys found in several siphons of the Friant-Kern Can…	7 - Natural system modifications; 7.2 - Dams & water management/use	Sparsely distributed in the San Joaquin River drainage, California; range and abundance are not well known due to similarity to other lampreys; habitat has been lost and degraded by dams and diversions, which constitute a continuing threat; populations are fragmented by diversions.			VU - Vulnerable	Threatened	1	0	0	0	0	0	0	0	1	1	0	1	Krista Kemppinen: This species received a negative 90 day finding in 2004 (USFWS 2004). Note also that species is known in NatureServe (2014), ECOS and IUCN (2013) as Lampetra hubbsi.	1	0	Krista Kemppinen
105862	Etheostoma ditrema	Coldwater Darter	Fishes - Freshwater and Anadromous Bony, Cartilagi	G1G2	G1	2023-02-16	2023-02-16	US	N1N2	N1	2023-02-16	AL (S2), GA (S1), TN (S1)	B = 6 - 20	This species is known from about ten distinct localities, which approximate occurrences (using a separation distance of 10 km), with records from the period 1993-2022 (GBIF 2023). In Alabama, it is known from Coldwater Creek, Glencoe Spring/Little Cove Creek, and Mill Creek (NatureServe 2023). In Georgia, it is known from the Conasauga, Coosa, and Oostanaula River systems and is presumed extirpat…	U = Unknown	Adult population size is unknown. Page and Burr (2011) regarded it as rare and highly localized.	DE = Decline of 30-70%	Several occurrences are possibly extirpated, likely due to sedimentation and habitat alterations (NatureServe 2023). Some of these historical localities include Sand Spring in Georgia, last collected in 1966 and now a swimming pool, Martin Spring in Alabama, last collected in 1967 and now inundated by Weiss Lake, and Estelle Spring in Georgia, last collected in 1974 (NatureServe 2023).	F = Decline of 10-30%	Trend over the past 10 years or three generations is uncertain due to the limited data available, but the species is certainly declining due to loss and degradation of its habitat. In Georgia, as of 2009, it has only been documented from 13 locations, with persistence at seven of the 13 collection locations, and it is either extirpated or extremely rare within the remaining sites (Mitchell 2019).…	As this species requires vegetated springs, it is extremely vulnerable to habitat alterations caused by water supply development, vegetation control practices (e.g., herbicides), urban development, industry, and drought (Mitchell 2019, Alabama Department of Conservation and Natural Resources 2015, Boschung and Mayden 2004).Spring habitats are rapidly being altered through use of chemicals to elim…	1 - Residential & commercial development; 1.1 - Housing & urban areas; 7 - Natural system modifications; 7.2 - Dams & water management/use; 8 - Invasive & other problematic species, genes & diseases; 8.1 - Invasive non-native/alien species/diseases; 9 - Pollution; 9.1 - Domestic & urban waste water; 9.2 - Industrial & military effluents; 9.3 - Agricultural & forestry effluents; 11 - Climate chang…	This species is restricted to a small number of isolated springs and spring runs in the Coosa River system that are threatened by pollution and development. Although recent population trend data are lacking, it has experienced widespread degradation of its delicate spring habitat and continued population losses over the next few decades are likely.			EN	Threatened	1	0	0	0	0	1	0	0	1	0	0	0		1	0	Will Harlan
106003	Cyprinodon eremus	Sonoyta Pupfish	Freshwater and Anadromous Fishes	G1	G1	2000-12-08	2011-11-21	US	N1	N1	2000-12-08	AZ (S1)	A = 1 - 5	Extant populations represent at least and perhaps at most three distinct occurrences (Hendrickson and Varela 1989, Echelle et al. 2000).	E = 2500 - 10,000 individuals	In the late 1990s, the estimated total population in the Quitobaquito spring complex averaged 9,556 individuals (Douglas et al. 2001). In two sampling points along the Rio Sonoyta, one in a river segment at least 3 km long and the other in a segment about 13 km long, C. eremus comprised 15.1-15.9 percent of 636 and 447 fishes collected, respectively (Hendrickson and Varela 1989).				Trend over the past 10 years (three generations is less than 10 years) is uncertain but likely highly variable. Abundance in Quitobaquito Springs in recent years varied annually in response to unknown factors from fewer than 1,000 to nearly 10,000 individuals (Minckley and March 2009). Abundance index at Quitobaquito stayed within historical limits even during the water level problems of 2005-200…	This species is relatively intolerant of competition and predation, and it is easily displaced by introduced fishes. Cyprinodon eremus coexists with mosquitofish (Gambusia affinis) and black bullhead (Ameiurus melas) in the Rio Sonoyta. Mosquitofish are increasing there, perhaps at the expense of C. eremus; the impact of the bullheads is uncertain but likely they are a predator (Hendrickson and V…	7 - Natural system modifications; 7.2 - Dams & water management/use; 8 - Invasive & other problematic species, genes & diseases; 8.1 - Invasive non-native/alien species/diseases; 9 - Pollution; 9.3 - Agricultural & forestry effluents; 9.5 - Air-borne pollutants	Small range in southern Arizona and Rio Sonoyta drainage in northwestern Mexico; just a few occurrences; threatened by exotic fishes and by groundwater pumping and pesticide spraying associated with agriculture.		LE as part of desert pupfish		Endangered	1	0	1	0	0	1	0	0	1	0	0	0	Krista Kemppinen: Cyprinodon eremus should be listed because the listed entity Cyprinodon macularius is now known to constitute three separate species: C. macularius, C. eremus and C. arcuatus (extinct) (USFWS 2019). Listed as EN by IUCN in 2019 (NatureSeve et al. 2019). The Natureserve conservation status factors edition date (4/6/2012) is more recent than the global status last reviewed date (1…	1	0	Krista Kemppinen
106048	Thryomanes bewickii altus	Appalachian Bewick's Wren	Birds	G5T2Q	T2	1997-07-08	1997-07-08	US	N2B,N2N	N2B,N2N	1998-06-09	AL (SHB), GA (SNR), MD (SXB), NC (SXB), PA (SH), SC (SX), TN (SH), VA (SHB), VA (SHB), WV (S1)	B = 6 - 20	Probably less than 20 breeding sites.	AC = 1 - 1000 individuals	Now (1997) very rare or extirpated over much of former breeding range where formerly common. Period of maximum abundance around 1930-1940 occurred after a steady increase from the late 1800's.			AE = Decline of >30%	Formerly uncommon to common within range, but now extirpated or reduced to very few breeding pairs in Georgia, Kentucky, Maryland, North Carolina, Ohio, Ontario, Pennsylvania, South Carolina, Tennessee, Virginia, West Virginia (Bartgis 1986, Brauning 1992, Buckalew and Hall 1994, Peterjohn and Rice 1991).	Causes of decline unknown; possibly competition from the House Wren (TROGLODYTES AEDON) (Hall 1983, Peterjohn and Rice 1991).		Very few extant occurrences, precipitous decline in all areas of range from maximum population sizes from 1930-1940.					1	0	0	0	1	0	0	1	1	0	0	0		1	0	Will Harlan
106088	Lavinia exilicauda chi	Clear Lake Hitch	Freshwater and Anadromous Fishes	G4T1	T1	2014-09-17	2014-09-17	US	N2	N2	1996-09-05	CA (S1)	A = 1 - 5	Confined to Clear Lake and four small nearby lakes and ponds.	FH = 10,000 to >1,000,000 individuals	Still common. Fished commercially in the past.			F = Decline of 10-30%	Numbers seem to be declining.	Still common in Clear Lake but populations are diminished due mainly to loss of spawning habitat and loss of nursery areas (Moyle et al. 1989). Water diversions cause streams to dry up earlier than normal, resulting in reproductive failure. Some former spawning areas (e.g., Adobe and Kelsey creeks) are now blocked by roads and other obstructions. Fishes in some spawning areas are destroyed by loc…		Restricted to a handful of sites in and near Clear Lake, California; threats include loss of nursery habitat and disturbance of spawning grounds.					1	0	0	0	1	1	0	1	1	1	0	1	CBD petitioned 9/25/2012_x000D_ Not warranted finding 12-2-20, but clearly warranted. CFGC listed as T in 2014_x000D_ New USFWS finding due Jan 12, 2025; submitted emergency listing petition Dec 2022, CFGC supported	1	1	Jeff Miller
106104	Etheostoma pyrrhogaster	Firebelly Darter	Freshwater and Anadromous Fishes	G2G3	G2	1996-09-24	2011-12-30	US	N2	N2	1996-12-05	KY (S1), TN (S2)	B = 6 - 20	Powers and Mayden (2003) mapped 9 collection sites in about 8 different streams.	U = Unknown	Total adult population size is unknown. This species is regarded as uncommon (Page and Burr 2011).			FG = Decline of <30% to relatively stable	Trend over the past three generations is uncertain but probably relatively stable or slowly declining.	Rechanneling of streams has had an adverse impact; additional habitat degradation could lead to a situation wherein federal listing as Threatened would be warranted (Bailey and Etnier 1988). Warren et al. (2000) rated E. pyrrhogaster (before the recognition of E. cervus as a distinct species) as "vulnerable." After the taxonomic split, Jelks et al. (2008) still rated this species as "vulnerable".…	7 - Natural system modifications; 7.3 - Other ecosystem modifications	Small range in Obion River system, western Tennessee and southwestern Kentucky; uncommon; rechanneling of streams has had an adverse impact; additional habitat degradation could lead to situation wherein federal listing as Threatened would be warranted.				Vulnerable	1	0	0	0	0	0	0	0	1	0	0	0		1	0	Will Harlan
106106	Cyprinodon nevadensis	Amargosa Pupfish	Freshwater and Anadromous Fishes	G2	G2	1996-09-20	2011-11-22	US	N2	N2	1996-12-05	CA (SNR), NV (S2)	B = 6 - 20	This species is represented by a fairly large number of occurrences (subpopulations) but probably a much smaller number of locations (as defined by IUCN) because multiple subpopulations may be simultaneously affected by single threats such as regional lowering of groundwater levels or invasion of a wetland complex by a non-native species.	GH = 100,000 to >1,000,000 individuals	Total adult population size is unknown but apparently quite large (likely greater than 100,000).	F = Decline of 10-30%	Most populations are at or near historical levels (Moyle 2002), though one subspecies is extinct and two are listed as Endangered under the U.S. Endangered Species Act.	G = Relatively Stable (<=10% change)	Trend over the past 10 years or three generations is uncertain but probably relatively stable or slowly declining. Three generations is less than 10 years.	Declines have been associated with habitat destruction and introduction of exotic species. This species would benefit from removal of exotic fishes, crayfish, and bullfrogs from habitat (Williams and Sada 1985, Williams and Deacon 1986).This species remains threatened primarily by dewatering of habitat through groundwater pumping by humans, and by negative impacts of non-native aquatic species (M…	7 - Natural system modifications; 7.2 - Dams & water management/use; 8 - Invasive & other problematic species, genes & diseases; 8.1 - Invasive non-native/alien species/diseases	Small range in spring systems in the Amargosa River Basin, San Bernardino and Inyo counties, California, and Nye County, Nevada; present threats include dewatering of habitat caused by exceesive groundwater extraction by humans and negative effects of introduced fishes, crayfishes, and bullfrogs.			VU - Vulnerable		1	0	0	0	0	1	0	0	1	0	0	0	Krista Kemppinen: Not listed at the species-level. Out of the 6 subspecies identified in NatureServe, 2 are listed (C. n. pectoralis and C. n. mionectes). One subspecies (C. n. calidae) was listed but is now extinct (ECOS 2022).	1	0	Krista Kemppinen
106174	Etheostoma tuscumbia	Tuscumbia Darter	Freshwater and Anadromous Fishes	G2	G2	1996-09-24	2012-01-24	US	N2	N2	1996-12-05	AL (S2), TN (SX)	B = 6 - 20	Boschung and Mayden (2004) mapped 25 collection sites and indicated that the species has been extirpated in 12 of those sites.	U = Unknown	Total adult population size is unknown. This species can be locally numerous in favorable habitat (common in a few springs).	DE = Decline of 30-70%	This species evidently has been extirpated from roughly 50% of the known collection localities (Etnier and Starnes 1993, Boschung and Mayden 2004).	U = Unknown	Current trend is unknown.	The primary threat to this species is human modification of spring heads. Extirpations have occurred in Alabama as a result of vegetated spring heads being converted to fishing ponds or treated with herbicides to remove vegetation (Boschung and Mayden 2004). Former habitat in Tennessee was inundated by Pickwick Reservoir (Etnier and Starnes 1993).	7 - Natural system modifications; 7.2 - Dams & water management/use; 7.3 - Other ecosystem modifications	Narrow range in springs along the Tennessee River in Alabama; extirpated in Tennessee, extirpated from roughly half of known sites in Alabama; populations are vulnerable to alteration of spring heads.			VU - Vulnerable	Threatened	1	0	0	0	0	0	0	0	1	1	1	0	positive 90 day finding in 2011 --Maria Papadopoulos	1	0	Will Harlan
106201	Siphateles bicolor ssp. 9	Dixie Valley Tui Chub	Freshwater and Anadromous Fishes	G4T1Q	T1	2001-07-02	2001-07-02	US	N1	N1	1996-12-05	NV (S1)	A = 1 - 5								Threats include water diversion for cattle and agriculture.		Known from two sites in Nevada; vulnerable to habitat dewatering; taxonomic status uncertain.				Endangered	1	0	0	0	1	0	1	0	1	0	0	0		1	0	Patrick Donnelly
106203	Chasiempis sclateri	Kauai 'Elepaio	Birds	G2G3	G2	2015-08-08	2015-08-08	US	N2N3	N2	2015-08-08	HI (S2)	A = 1 - 5	The entire range can be regarded as one occurrence, or perhaps up to a few occurrences at most.	F = 10,000 - 100,000 individuals	Surveys in the Alaka'i Plateau and Kôke'e region in 2008 yielded a population estimate of 28,506 individuals (95% CI: 14,256- 36,666) (M. Gorresen in litt. 2011, cited by BirdLife International species account).	CD = Decline of 50-80%	Over the long term (ca. 200 years), area of occupancy and population size have greatly decreased.	GH = Relatively Stable to increase of <25%	Population exhibited a 13 percent increase in mean density in the Alaka'i Plateau from 2000 to 2008 (M. Gorresen in litt. 2011, cited by BirdLife International species account).	Threats include introduced avian diseases, introduced predators (rats, feral cats, mongoose), and habitat degradation by feral ungulates. Hurricanes periodically may cause large population declines (Pratt 1994).On the Alaka’i Plateau, prevalence of malarial infection in Kaua’i ‘Elepaio increased from 17% to 27% between 1994–1997 and 2007–2013, concurrent with an increase in detections of Culex la…	8 - Invasive & other problematic species, genes & diseases; 11 - Climate change & severe weather; 11.4 - Storms & flooding	Small reduced range on the island of Kaua’i, Hawaiian Islands; population size around 28,500, recently increasing; vulnerable to introduced diseases and negative impacts of catastrophic events, such as hurricanes or introductions or expansion of non-native species.			VU - Vulnerable		1	0	1	0	0	1	0	1	1	1	0	0	Population may be increasing but needs review given spread of mosquitoes and avian malaria with climate change.	1	0	Noah Greewald
107106	Siphloplecton fuscum	a primitive minnow mayfly	Mayflies	G1	G1	2014-08-06	2014-08-06	US	N1	N1	2007-02-05	FL (S1)	A = 1 - 5	Known only from one or two stream systems, and very few collection sites (Blackwater River in Okaloosa Co., Florida) (Pescador and Richard, 2004).	AC = 1 - 1000 individuals	Typically found in low abundance (M. Pescador and J. Peters, pers. comm. to D. Almquist, 2010).	U = Unknown	Determination of population trends requires a higher level of monitoring than is likely to occur. The general trend of the species' aquatic breeding and developmental habitat is fairly stable, although some losses and degradation may occur.	U = Unknown	Determination of population trends requires a higher level of monitoring than is likely to occur. The general trend of the species' aquatic breeding and developmental habitat is fairly stable, although some losses and degradation may occur.	Threat factors are estimated as Low based on general stability of aquatic breeding and developmental habitats, though geographically specific (site) data may suggest that one or more of these should be raised to Medium or even High. All forms of stream quality degradation pose potential threats. These include siltation as a result of road crossings or cutting trees too close to streams; pollution…		Known only from a single, relatively small river basin.					1	0	0	0	0	0	1	0	1	0	0	0		1	0	Will Harlan
106423	Elassoma boehlkei	Carolina Pygmy Sunfish	Freshwater and Anadromous Fishes	G2	G2	1996-09-23	2011-11-29	US	N2	N2	1996-09-05	NC (S2), SC (S1)	B = 6 - 20	This species is represented by several distinct occurrences (subpopulations).	U = Unknown	Total adult population size is unknown. The species is extremely localized and uncommon (Page and Burr 2011) but not rare; sometimes locally common (Sandel and Harris 2007).			FG = Decline of <30% to relatively stable	South Carolina populations seem stable; populations near Lake Waccamaw (Brunswick and Columbus counties, North Carolina) seem to be in decline (Sandel and Harris 2007).At times, this species is relatively common in known habitat patches. Populations either use alternate habitats or fluctuate substantially with the seasons (Sandel and Harris 2007).	Rohde and Arndt (1987) and Sandel and Harris (2007) reported threats as follows. Local extirpations have been associated with urbanization. Anecdotal evidence suggests that competition with congeners may exclude this species from optimum habitat. Some populations are at considerable risk of over-harvesting by private aquarists. Recent droughts have severely affected the populations in North Carol…	1 - Residential & commercial development; 5 - Biological resource use; 5.4 - Fishing & harvesting aquatic resources; 9 - Pollution; 11 - Climate change & severe weather; 11.2 - Droughts	Small range in North Carolina and South Carolina; occurs in at least eight separate streams; no significant threats at the present time, but some roadside populations are vulnerable.			VU - Vulnerable	Threatened	1	1	0	0	0	0	0	0	1	1	1	0	positive 90 day in 2011 --Maria Papadopoulos	1	0	Will Harlan
106498	Trogloglanis pattersoni	Toothless Blindcat	Freshwater and Anadromous Fishes	G1G2	G1	2002-08-21	2012-04-12	US	N1N2	N1	2002-08-21	TX (S1)	A = 1 - 5	This species is represented by 5 sampling localities, which represent an unknown number of distinct occurrences (subpopulations). Probably the entire San Antonio Pool should be regarded as a single occurrence.	U = Unknown	Total adult population size is unknown, but sampling information suggests that the species is apparently abundant (Longley and Karnei 1979).	U = Unknown		U = Unknown	Trend is unknown. Access to potential sampling sites is limited by low flow rates of artisan wells and denied access to previous collecting sites on private property.	This species is potentially threatened by overpumping of the aquifer, which is the primary source of water for people in the region. In the 1990s the world's largest water well (at that time) was drilled close to the known habitat of the species, and the water was briefly used to support a catfish farm; subsequently the well and water rights were purchased by the San Antonio Water System, which n…	7 - Natural system modifications; 7.2 - Dams & water management/use	Extremely restricted range in subterranean waters of the San Antonio Pool of the Edwards Aquifer in Texas; population size and trend are unknown; vulnerable to pollution and depletion of the aquifer. Conservation status needs further evaluation; NatureServe rank calculator version 6.2 generated a rank of G2.			VU - Vulnerable	Endangered	1	0	0	0	0	0	0	0	1	1	1	0	positive 90 day in 2009 --Maria Papadopoulos	1	0	Krista Kemppinen
106567	Etheostoma sp. 1	Upper Coosa Darter	Freshwater and Anadromous Fishes	G1G2Q	G1	1997-07-02	1999-03-03	US	N1	N1	2000-10-20	AL (S1), GA (SNR)		Mettee et al. (1996) mapped 4 collection sites (as E. DITREMA).							Threats include water quality degradation (potential), lowering of aquifer, and loss of aquatic vegetation in spring habitat. Probably very sensitive to changes in physical habitat such as temperature, turbidity, and pH.		Small range in the Coosa River system, Alabama; potentially threatened by habitat degradation.					1	0	0	0	1	0	0	0	1	0	0	0		1	0	Will Harlan
106583	Papaipema sciata	Culvers Root Borer	Papaipema Moths	G2G3	G2	2023-09-29	2023-09-29	US	N3N4	N3	1999-08-12	CT (SH), IA (SNR), IL (SNR), IN (S1S2), ME (SNR), MI (S3), MN (SNR), MO (SU), NJ (SH), NY (SH), WI (SU)	C = 21 - 80	This species is known from approximately 40 occurrences using a 2 km separation distance and records from 1993-2023 (Indiana Natural Heritage Data Center 2021; iNaturalist 2023; SCAN 2023; GBIF 2023).			D = Decline of 50-70%	This species has not been documented in recent decades in the eastern and southern parts of its historical range, including New York, New Jersey, Connecticut, and most of Illinois and Indiana, where large amounts of its prairie habitat have been destroyed (Schweitzer 2011; SCAN 2023; GBIF 2023; iNaturalist 2023).	F = Decline of 10-30%	There are limited data available to estimate a short-term population trend, but it has continued to decline in at least part of its range in Indiana (Indiana Natural Heritage Data Center 2021; GBIF 2023; SCAN 2023; iNaturalist 2023).	This species is threatened by habitat loss and fragmentation due to development and conversion to agriculture, over-browsing by deer, prescribed burning, as well as increased stormwater run off due to climate change, at least where it occurs in prairie fens (Landis et al. 2011; Schweitzer 2011; Indiana Natural Heritage Data Center 2021; Michigan Natural Features Inventory 2023).	1 - Residential & commercial development; 1.1 - Housing & urban areas; 2 - Agriculture & aquaculture; 2.1 - Annual & perennial non-timber crops; 2.1.4 - Scale unknown/unrecorded; 7 - Natural system modifications; 7.1 - Fire & fire suppression; 7.1.1 - Increase in fire frequency/intensity; 8 - Invasive & other problematic species, genes & diseases; 8.2 - Problematic native species/diseases; 8.2.2 …	This species has experienced historic population declines due to habitat loss and now has few occurrences throughout its reduced range where it is subject to many threats.					1	0	0	0	0	0	0	1	1	0	0	0		1	0	Noah Greewald
106586	Pseudanophthalmus senecae	Seneca Cave Beetle	Ground Beetles	G1	G1	2006-06-19	2023-02-16	US	N1	N1	2006-06-19	WV (S1)	A = 1 - 5	There are three caves with known occurrences, however two of the caves are within 200 meters of each other, which is less than the separation distance of one kilometer. It is unknown if the beetles could get between the caves, or if the locations of where the beetles were found within the caves were further apart than one kilometer. Thus there are between two and three occurrences. Two of the cav…			U = Unknown	There isn't enough data, surveys or specimens located to establish a long-term trend.	U = Unknown	There isn't enough data, surveys or specimens located to establish a short-term trend.	A number of potential threats could impact this species including sewage contamination from feedlots, grazing pastures or any other source of human or animal waste, pesticides used for crops, livestock, trails, roads or other applications, hazardous material introductions via accidental spills or deliberate dumping, including road salting. Habitat alteration due to sedimentation is a threat poten…	1 - Residential & commercial development; 1.3 - Tourism & recreation areas; 9 - Pollution; 9.2 - Industrial & military effluents; 9.3 - Agricultural & forestry effluents; 11 - Climate change & severe weather; 11.4 - Storms & flooding	There are three locations, all located in close proximity to each other and without apparent protection of or management for conservation.					1	0	0	1	0	0	0	0	1	0	0	0		1	0	Noah Greewald
106615	Helisoma newberryi	Great Basin Ramshorn	Freshwater Snails	G1	G1	2001-06-01	2020-12-08	US	N1	N1	2001-06-01	CA (S1S2), ID (SX), NV (SX), OR (S1), UT (SX), WY (S1)	A = 1 - 5	The species has been recorded from numerous localities, but as of 2020, the best estimate is that only five or fewer occurrences still support living subpopulations (Taylor 1981, 1985; Taylor and Smith 1981; Frest and Johannes 1993, 1994, 1995a, 1995b, 1995c, 1998).	U = Unknown		BC = Decline of 70-90%	This species has been widely extirpated from across its range, indicating a widespread, long-term population decline (Taylor and Smith 1982, Taylor 1985, Koehler 1995, Frest and Johannes 1995b).	D = Decline of 50-70%	Populations found in surveys in the 1990's in the Klamath Lake area have not been detected in recent survey efforts presumably from the general overall decline of the freshwater habitats it relies on (Johannes, E. personal communication, 2020)	Springs in Upper Klamath Lake proper are badly affected by past dredging to facilitate log transport and by current severe nutrient enhancement and sedimentation. The species does not occur in areas with dense beds of macrophytes such as Myriophyhm and Elodea, nor in areas subject to eutrophication or periodic hypoxic episodes. Many springs in the Great Basin and Oregon Interior Basin are so heav…	2 - Agriculture & aquaculture; 7 - Natural system modifications	This species has a broad range, but has become extirpated in most sites across the range due primarily to water management activities.			NE		1	0	0	0	0	0	0	0	1	1	0	1	New petition filed 2024.	1	0	Noah Greewald
106637	Pleurobema chattanoogaense	Painted Clubshell	Freshwater Mussels	G1Q	G1	2000-08-30	2009-05-12	US	N1	N1	2000-08-30	AL (SNR), GA (SNR), TN (S1?)	A = 1 - 5	Recent collections yielded a few shells from localized portions of one river. There exist recent collections of a few live and fresh dead shells of each species from localized portions of the upper Conasauga River in Murray and Whitfield counties, Georgia (USFWS, 2003). It is questionable as to whether it still exists in the Conasauga River in Tennessee (Parmalee and Bogan, 1998). It is thought t…	U = Unknown		AC = Decline of >70%	Pleurobema chattanoogaense has been extirpated from well over 90 percent of their historic range. This species is currently known from isolated populations surviving in localized portions of a short reach of the Conasauga River above Dalton, Georgia, and a short reach of the Coosa River in Cherokee Co., Alabama (USFWS, 2003).	D = Decline of 50-70%	Once a common species in stretches of the Conasauga River in Tennessee and northern Georgia; now few if any populations remain (Parmalee and Bogan, 1998). It is thought to be extirpated from over 90 percent of its historic range (USFWS, 1999). In 1990, the U.S. Fish and Wildlife Service initiated a status survey and review of the molluscan fauna of the Mobile River Basin reported 14 species of mu…	Causes of the decline can be attributed to extensive impoundment of the Coosa River and its primary tributaries, and the effects of point and non-point source pollution on the surviving isolated populations. Isolated populations are vulnerable to land surface runoff that affects water quality or the suitability of aquatic habitats within a watershed. Blocked from avenues of emigration to less aff…	7 - Natural system modifications; 7.2 - Dams & water management/use; 9 - Pollution; 9.1 - Domestic & urban waste water; 9.3 - Agricultural & forestry effluents	A collection of recently dead shells in 1997 increase the likelihood that this species is still extant, at least in one stretch of the Conasauga River only. Otherwise it is in imminent danger of extinction, however there are severe questions as to its taxonomic authenticity.			CR - Critically endangered	Endangered	1	0	0	0	1	0	0	0	1	0	0	0	candidate status removed in 2005 --Maria Papadopoulos	1	0	Will Harlan
106708	Floridobia parva	Pygmy Siltsnail	Freshwater Snails	G1	G1	2004-08-11	2008-10-30	US	N1	N1	2004-08-11	FL (S1)	A = 1 - 5	One occurrence is known: Blue Spring (into St. Johns River system), Volusia County, Florida (type locality).	U = Unknown		U = Unknown		U = Unknown		The occurrence is in a state recreational area that seeks to protect this site.		Only one known occurrence is a short section of a spring run (area of occupancy less than 0.4 square km), with the threat of human disturbance and trend information not known.			VU - Vulnerable		0	0	0	0	0	0	0	0	1	1	1	0	positive 90 day in 2011 --Maria Papadopoulos	1	0	Will Harlan
106723	Lithasia salebrosa	Muddy Rocksnail	Freshwater Snails	G2G3Q	G2	2009-01-14	2009-01-14	US	N2N3	N2	2009-01-14	AL (S1), KY (S2S4), TN (S2)	BC = 6 - 80	In Tennessee, Bogan and Parmalee (1983) note it inhabited the Elk River, Duck River in Maury Co., lower Stones River in Davidson Co., lower Caney Fork River in Smith Co. and the Cumberland River in Montgomery and Stewart Cos.; as well as recently from the Duck River in Marshall Co. and Tennessee River in tailwaters of Pickwick Landing dam. In Alabama, known from Tennessee River at Muscle Shoals (…	U = Unknown		EG = Decline of <50% to Relatively Stable	It formerly inhabited the Tennessee River at Muscle Shoals and in Cypress Creek in Lauderdale Co., Alabama and the Elk River in Tennessee and Limestone Co., Alabama (Goodrich, 1940; Davis, 1974). It was collected from thhe Duck River in Maury Co., the lower Stones River in Davidson Co. and from the lower Caney Fork River in Smith Co., all in Tennessee (Davis, 1974). It formerly lived in the lower…	F = Decline of 10-30%	It formerly inhabited the Tennessee River at Muscle Shoals and in Cypress Creek in Lauderdale Co., Alabama and the Elk River in Tennessee and Limestone Co., Alabama (Goodrich, 1940; Davis, 1974). It was collected from thhe Duck River in Maury Co., the lower Stones River in Davidson Co. and from the lower Caney Fork River in Smith Co., all in Tennessee (Davis, 1974). It formerly lived in the lower…	Impoundment of the Tennessee River has caused it to decline and it is now endangered in Alabama.		This species is endemic to less than 1000 square km of the Tennessee and Cumberland River systems where it is uncommon and secure in small areas of Tennessee but rare and in decline in Kentucky (no recent records) and Alabama (state endangered). It has experienced decline in Alabama where impoundment of the Tennessee River has contributed to loss of habitat. Overall threat information has not bee…			VU - Vulnerable		1	0	0	1	1	0	1	0	1	0	0	0		1	0	Will Harlan
106733	Discus marmorensis	Marbled Disc	Terrestrial Snails	G1	G1	2017-12-05	2017-12-05	US	N1N2	N1	2006-02-03	ID (S2)	A = 1 - 5	Known only from a few sites clustered closely in Idaho County, Idaho, with no new localities despite recent survey efforts (Frest and Johannes 1995, Hendricks et al. 2006).			AD = Decline of >50%	All sites within the known range have been damaged.	EF = Decline of 10-50%	Habitat loss is continuing. No recent data is available on species range or distribution.	The range is very small and all known sites face a number of threats.	2 - Agriculture & aquaculture; 2.3 - Livestock farming & ranching; 3 - Energy production & mining; 3.2 - Mining & quarrying; 4 - Transportation & service corridors; 4.1 - Roads & railroads; 5 - Biological resource use; 5.3 - Logging & wood harvesting	Known only from a few sites clustered closely in Idaho County, Idaho, with no new recent localities.			VU - Vulnerable		1	0	0	0	0	0	0	0	1	0	0	0		1	0	Noah Greewald
106760	Distocambarus youngineri	Newberry Burrowing Crayfish	Crayfishes	G1	G1	1999-11-03	2009-07-01	US	N1	N1	1999-11-03	SC (S1)	B = 6 - 20	Recent status survey by an experienced collector found ten locations. Eversole (1995) found this species at two historical sites and four new sites within the Saluda River basin in Newberry Co., South Carolina.	AC = 1 - 1000 individuals	Distocambarus youngineri has been reported to have a very small total population in South Carolina . There are believed to be 1-1,000 individuals in South Carolina with a past decline of 10-30% (in an unknown time frame) and a current declining population. This species is no longer present at its type-locality which was clear cut in 1989.			F = Decline of 10-30%	The species is no longer present at its type-locality. The area around the type-locality was clearcut in 1989 and repeated attempts have been made to recollect there.	In 1989 the entire forested area which is this species type location was clear felled. This species is no longer found at this location. This species appears to be sensitive to clear cutting and so any future felling could cause a decline in the population abundance. This species is also impacted by ground water abstraction.	5 - Biological resource use; 5.3 - Logging & wood harvesting; 7 - Natural system modifications; 7.2 - Dams & water management/use; 9 - Pollution; 9.3 - Agricultural & forestry effluents	This species has a very limited range; and very small populations in South Carolina. The type locality of this species has been changed and now the species no longer exists there.			VU - Vulnerable	Endangered	1	0	0	0	1	0	0	0	1	1	1	0	positive 90 day in 2011. Small population and habitat loss.	1	0	Will Harlan
106821	Farula constricta	a farulan caddisfly	Caddisflies	G1G2	G1	2016-07-01	2016-07-01	US	N1	N1	2005-02-23	OR (S1S2)	A = 1 - 5	4 or 5 occurrences, all in Columbia River Gorge, Oregon.	U = Unknown		U = Unknown		G = Relatively Stable (<=10% change)	No information on trends.	Runoff and sedimentation from road construction, hiking in Gorge. Cold water dependent species may be vulnerable to climate change.		This species has a very limited range, narrow habitat requirements, and faces threats from sedimentation and potentially climate change.					1	0	0	0	0	0	0	1	1	1	0	0		1	0	Noah Greewald
106842	Bouchardina robisoni	Bayou Bodcau Crayfish	Crayfishes	G2	G2	2009-05-28	2009-07-01	US	N2	N2	2009-05-28	AR (S1)	B = 6 - 20	This species has a restricted range in southwestern Arkansas but is known from several sites in 2 drainages and 4 counties.	CF = 250 - 100,000 individuals	Four very experienced collectors secured only 40 individuals in 2.5 hours (Hobbs, 1977).	U = Unknown		U = Unknown		It is unknown whether there are any major threats impacting this species. However, it is likely to be undergoing localized declines due to urbanization, alterations to the hydrological regime and water pollution.	1 - Residential & commercial development; 1.1 - Housing & urban areas; 7 - Natural system modifications; 7.2 - Dams & water management/use; 9 - Pollution; 9.1 - Domestic & urban waste water	This species has a restricted range in southwestern Arkansas but is known from several sites in 2 drainages and 4 counties. However, there have been no attempts to located this species on other sites, therefore the distribution of this species cannot be verified. Additionally, there are no known threats to this species recorded. Further research is required to determine a more recent population a…			DD - Data deficient	Vulnerable	1	0	0	0	0	0	0	0	1	1	1	0	positive 90 day in 2011 --Maria Papadopoulos	1	0	Will Harlan
106854	Photedes carterae	Carter's Noctuid Moth	Other Moths	G2G3	G2	1999-09-18	2011-03-22	US	N2N3	N2	1993-06-03	NC (S2S3), NJ (S2)	C = 21 - 80	Foodplant is a former USFWS C2 grass with limited range, but most populations of it have this moth at least in New Jersey, the stronghold of both. It does not appear to persist at isolated stands of the plant such as in Virginia and at the fringes of the New Jersey range. Depending on how one defines occurrences there are a few to a few dozen occurrences in each state.		Most populations are small or sparse so that one usually sees fewer than 10 adults per night, but in the prairie like areas of Ft. Dix one can see better than 20 adults per acre on good nights and this is probably true over close to 1000 acres some years. Numbers probably fluctuate with fire patterns at most sites, but could be very stable if fires were frequent and mostly in the late spring or s…	DE = Decline of 30-70%	Has undoubtedly declined greatly in North Carolina as originally widespread pyrogenic open habitats (flatwoods, savannas etc.) were lost to fire suppression and sometimes pine farming (with destructive site preparation techniques). It is less clear that it has declined in New Jersey so far, although most likely it has in the last 50 years as wildfires have declined in acreage.	G = Relatively Stable (<=10% change)	This species is persisting in New Jersey mainly in spite of or uninfluenced by management practices. It may benefit more from prescribed burning as practiced in North Carolina. It benefits directly from wild fires on military lands but otherwise persists in New Jersey basically because efforts to prevent and control wildfires still often fail and because a few sites are stable due to hydrology. P…	Probably seriously threatened by dormant season prescribed burns at some EOs. However more information is needed as to precisely when early instars actually are vulnerable. It is not known whether they enter the plant in the fall, which is likely, and if so whether they do so via the root crown where they would have some protection from fires, or remain in the dead grass all winter. It is likely …		There are more than 20 occurrences but in a small, three part range in New Jersey and North Carolina which is nearly the same as foodplant, and there probably are not 50 large viable metapopulations. If there are also populations of this in Georgia, there is little basis to guess how many--one population that appears to be this species is known in a high quality pine savanna. The species has beco…					1	0	0	1	0	0	1	0	1	0	0	0	Depends mainly on pine savannas in NJ and military base in NC	1	0	Will Harlan
106855	Hobbseus yalobushensis	Yalobusha Riverlet Crayfish	Crayfishes	G2	G2	2009-01-30	2009-07-01	US	N2	N2	2009-01-30	MS (S2)	B = 6 - 20	This species is a Mississippi state endemic occurring in a range of less than 100 square miles in the headwaters of the Yalobusha River (Yazoo River system) in Calhaun, Chickasaw and Webster Counties, Mississippi (Fitzpatrick and Busack, 1989; USFS, 2009). Fitzpatrick (2002) also reported the species from Attala and Choctaw counties, Mississippi, but the locations of voucher specimens from those …	E = 2500 - 10,000 individuals	The species is not rare, but range is probably restricted to extreme headwaters streams.	A = Decline of >90%		EG = Decline of <50% to Relatively Stable	The species is no longer present in the type locality and was recently found to be absent from several previously known localities (MS NHP, pers. comm., January 2009).	Channelization, head-cutting, and loss of riparian strips are all potential threats but none are imminent.	4 - Transportation & service corridors; 4.3 - Shipping lanes; 7 - Natural system modifications; 7.3 - Other ecosystem modifications	It is apparently established and healthy in area (basically rural with little farming) and not threatened by human encroachment, however it is confined to a small area of Calhaun, Chickasaw and Webster Cos., Mississippi, with most collections from over 20 years ago and the few recent surveys found it absent from the type locality and several other localities where it was previously documented. Th…			EN - Endangered	Endangered	1	0	0	0	0	0	0	0	1	1	1	0	positive 90 day in 2011 --Maria Papadopoulos	1	0	Will Harlan
106885	Elimia acuta	Acute Elimia	Freshwater Snails	G2	G2	2006-11-28	2008-10-30	US	N2	N2	2006-11-28	AL (S1), TN (S1)	B = 6 - 20	Goodrich (1930) documented this species at Muscle Shoals, (Tennessee River), Jackson and Franklin Cos., Alabama; the Tennessee River, Flint River, Piney Creek (Limestone Co., Alabama), and Elk River, Tennessee. Elimia acuta is more broadly distributed in the Tennessee River basin, however, populations are restricted to discrete stream drainages (P. Johnson, AL DCNR, pers. comm., November 2006).	BD = 50 - 2500 individuals	Pierson (pers. comm. 1997) described the species as "very rare."	E = Decline of 30-50%		F = Decline of 10-30%	Very rare and apparently declining. Pierson reported 1 occurrence in recent surveys (Pierson pers. comm. 1997).	If this species did occur in the Coosa River it was most likely extirpated due to impoundment of the river by construction of Logan Martin and Lay Dams.		Elimia acuta is very rare in Alabama but is more broadly distributed in the Tennessee River basin (total extent 100-250 square km), however, populations are restricted to discrete stream drainages and continue to decline moderate due to habitat loss.			VU - Vulnerable		1	0	0	0	1	0	0	0	1	1	1	0	positive 90 day in 2011 --Maria Papadopoulos	1	0	Will Harlan
106889	Euphilotes enoptes aridorum	Peavine Blue	Butterflies and Skippers	G5T1T2	T1	2023-11-21	2023-11-21	US	N1	N1	1999-06-01	NV (S1)	A = 1 - 5	This subspecies is only known from three occurrences (GBIF 2023; SCAN 2023).			U = Unknown	There are too few records to estimate a population trend (SCAN 2023; GBIF 2023).	U = Unknown	There are too few records during the appropriate time period (2013-2023) to estimate a short-term population trend (SCAN 2023; GBIF 2023; iNaturalist 2023).	There is not much information about this subspecies, but the nominate species is threatened by warming and precipitation changes due to climate change in the range of this subspecies (Forister et al. 2021; Forister et al. 2023).	11 - Climate change & severe weather; 11.1 - Habitat shifting & alteration	This subspecies has a small range and only a few known occurrences where it is threatened by climate change in its arid habitat.					0	0	0	0	1	0	0	0	1	0	0	0	Limited information.	1	0	Patrick Donnelly
106908	Remenus kirchneri	Blueridge Springfly	Stoneflies	G2	G2	1999-09-20	2009-09-25	US	N2	N2	1999-09-20	VA (S2)	B = 6 - 20	Inhabits small spring-fed streams and seeps of the Blue Ridge region of southwestern Virginia, and is known from < ten occurrences.							G_Rank_Reasons, development		Inhabits small spring-fed streams and seeps of the Blue Ridge region of southwestern Virginia, and is known from < ten occurrences. This area has recently experienced increased development and poor land management practices.					1	0	0	0	0	0	0	0	1	1	1	0	positive 90 day in 2011 --Maria Papadopoulos_x000D_ 3/29/22: part of 241 species lawsuit	1	0	Tamara Strobel
106914	Euphilotes bernardino minuta	Baking Powder Flat Blue	Butterflies and Skippers	G3G4T1	T1	1999-06-01	1999-06-01	US	N1	N1	1999-06-01	NV (S1)	A = 1 - 5	5 EORs as of 00-08-31.						Unknown	Habitat disturbance, especially trampling of the hostplant by livestock and vehicles.		Species is known from only one small area and its hostplant is subject to trampling and destruction by soil compaction which directly threatens the butterfly. This species was included in the Rare or Candidate Butterflies of Nevada (Austin et al, 1998).					1	0	0	0	0	0	0	0	1	0	0	0		1	0	Patrick Donnelly
106956	Atrytone arogos	Arogos Skipper	Butterflies and Skippers	G2G3	G2	2020-02-17	2020-02-17	US	N2N3	N2	2004-03-26	AL (SH), AR (S1), CO (S2), FL (S2), GA (SNR), IA (S2), IL (S1), KS (S3S4), LA (S1), MN (S3), MO (SNR), MS (SNR), MT (S2S3), NC (SH), ND (SU), NE (SNR), NJ (S1), NY (SH), OK (S3), PA (SX), SC (SH), SD (S2), TX (SNR), VA (SH), WI (SNA), WY (SNR)	D = 81 - 300	Approximately 200 U.S. counties (Opler, 1994; Stanford and Opler, 1993) historically. although many less now. It is gone from a majority of states east of the Mississippi and barely persisting in the remaining eastern states. Decline not as massive in the western portion of the range. In most parts of the range, most to all suitable habitats are vacant. Only in parts of New Jersey is the explanat…	U = Unknown	Local and usually uncommon to very rare A. arogos is now widely recognized to be, as noted by Klots (1951), "rather local and nowhere very common" (Royer and Marrone 1992, Ferris, 1981). Locally abundant to common in Colorado Front Range (Opler pers. comm.). It is perhaps the rarest butterfly or skipper still extant in New Jersey and it is much scarcer in other eastern parts of the range. There a…	AC = Decline of >70%	Sharp decline. A reasonable estimate would be a decline of more than 90% and maybe well over 99% since 1800. When Scudder (1869) named Hesperia iowa [Atrytone arogos iowa], he described it as "one of the most abundant Hesperians seen in Iowa." A. arogos is now widely recognized to be, as noted by Klots (1951) "rather local (and) nowhere very common" (Royer and Marrone, 1992). This along with the …	F = Decline of 10-30%	Still declining in New Jersey and probably recently extirpated in North Carolina and it very likely to have declined on the Gulf Coast in part due to due to impacts from Hurricane Katrina. This species is severely reduced but perhaps no longer declining in Florida where there are several records annually (SCAN 2020).Swengel et al. (2011) documented continued declines of this species (subspecies i…	Threats are very high to extreme for the eastern subspecies in the few places where it is not yet extirpated. Threat to the prairie subspecies are far less and probably comparable to many other prairie butterflies and skippers that need primarily adequate habitats with a sufficiently conservative burn regimen. Loss and fragmentation of habitat, due to development, silviculture, agriculture, and a…	1 - Residential & commercial development; 2 - Agriculture & aquaculture; 2.1 - Annual & perennial non-timber crops; 2.2 - Wood & pulp plantations; 7 - Natural system modifications; 7.1 - Fire & fire suppression	The four ecotypes collectively termed subspecies arogos are in serious trouble and are imperiled (in most places already extirpated) and the species is listed as Endangered in New Jersey, its stronghold in the 1990s and the only state northeast of Florida where it still occurs at all. Outside of New Jersey, all eastern occurrences appear critically endangered, or non-viable due to apparent comple…					1	0	0	0	0	1	1	1	1	0	0	0	Eastern subspecies particularly imperiled.	1	0	Noah Greewald
107023	Ophiogomphus australis	Southern Snaketail	Dragonflies and Damselflies	G1G2	G1	2005-05-23	2008-04-23	US	N1N2	N1	2005-05-23	FL (S1), LA (S1), MS (S1)	A = 1 - 5	Known from three rivers and streams in eastern Louisiana and adjacent Mississippi (Mauffray, 1997). According to Frank Carle there is much negative survey data. Specimens from Eglin AFB, Okaloosa County, Florida, were previously misidentified as O. incurvatus, but are in fact O. australis (Jerrell Daigle, pers. comm. to Dave Almquist, 2008).	E = 2500 - 10,000 individuals	Known from maybe 50 miles of stream, probably thousands in each of the three streams.	U = Unknown		F = Decline of 10-30%	Undoubtedly declining because of susceptibility of Ophiogomphus larvae to flood scouring and pollution.	Gravel mining, siltation, pesticides, and clear cutting/deforestation. Probably other threats related to flood scour. Scope of threat could be higher than "moderate".	3 - Energy production & mining; 3.2 - Mining & quarrying; 5 - Biological resource use; 5.3 - Logging & wood harvesting; 9 - Pollution; 9.3 - Agricultural & forestry effluents	Limited range and susceptibility to pollution and perturbation of stream flow.			EN - Endangered		1	0	0	0	0	0	0	0	1	1	1	0	positive 90 day in 2011 --Maria Papadopoulos	1	0	Will Harlan
107032	Auriculella pulchra	an achatinellid land snail	Terrestrial Snails	G1	G1	1990-08-07	1990-08-07	US	N1	N1	2003-06-12	HI (S1)	B = 6 - 20	24 POST-1945 OCCURRENCES, 5 RECENT (1978-1987), 19 HISTORICAL (1949-1974).	AC = 1 - 1000 individuals	COMMON UNTIL EARLY 1970'S AND OFTEN NOT COLLECTED, NUMBERS HAVE DECLINED RECENTLY, BUT A FEW POCKETS MAY REMAIN (CHUNG)					THREATENED BY INTRODUCED PREDATORS (EUGLANDINA AND RATS HABITAT DESTRUCTION AND OVERCOLLECTING.		G1S1.3. ONLY 24 POST-1945 OCCURRENCES AND ONLY 5 RECENT (SINCE 1978).			DD - Data deficient		1	1	0	0	1	1	0	0	1	1	0	0		1	0	Noah Greewald
107050	Helminthoglypta greggi	Mohave Shoulderband	Terrestrial Snails	G2	G2	2022-10-22	2022-10-22	US	N1	N1	2002-10-08	CA (S2)	B = 6 - 20	Recent mapping and analysis in the California Natural Diversity Database (CNDDB) suggests 4 occurrences. An additional 3 occurrences can be inferred from data in the GBIF (2022). However, there may be additional occurrences in suitable habitat in other mountain areas in the vicinity.	U = Unknown		D = Decline of 50-70%	Direct mining impacts at all locations likely substantially reduced habitat for this species.	F = Decline of 10-30%	Mining at one of the three known location is documenting as eliminating at least 25% of known occurrences of this species.	Although additional occurrences have been documented for this species since the last assessment, threats from mining and climate change are significant in some locations and will likely continue. There are currently inactive mines at two of the known mountain locations (Standard Hill and Middle Butte) and an active gold mine at the type/primary location (Soledad Mountain). As part of the environm…	3 - Energy production & mining; 3.2 - Mining & quarrying; 11 - Climate change & severe weather; 11.1 - Habitat shifting & alteration	There are more known locations for this species than when it was initially ranked. However, threats from mining and climate change are expected to significantly impact this species.					1	0	0	0	0	0	0	1	1	0	0	0		1	0	Jeff Miller
107140	Cambarus georgiae	Little Tennessee Crayfish	Crayfishes	G2G3	G2	2010-05-12	2010-05-12	US	N2N3	N2	2010-05-12	GA (S1), NC (S2)	BC = 6 - 80	In North Carolina, it is apparently restricted to the Little Tennessee and Tuckasegee River systems upstream from Fontana Reservoir (including one recent site in Alarka Creek), but is absent from the Nantahala and Oconaluftee River systems (Simmons and Fraley, 2010). LeGrand et al. (2006) cite the Little Tennessee drainage in Jackson and Macon Cos., North Carolina. In Georgia, it only occurs in t…	D = 1000 - 2500 individuals	An intensive survey for the species collected 302 individuals from 37 sites. Hobbs (1981) cites 51 specimens from a single site on the Little Tennessee River in Rabun Co., Georgia and Macon Co., North Carolina. It was collected at one of 13 sites surveyed recently (but not sites known to have historical occurrences) (Simon and Fraley, 2008).	U = Unknown		F = Decline of 10-30%	Hobbs (1981) notes some decline, especially at the type locality, based upon competition with Cambarus bartonii.	It is unknown if there are any major threats impacting upon Cambarus georgiae. Hobbs (1981) notes some decline, especially at the type locality, based upon competition with Cambarus bartonii but this is likely regional.	2 - Agriculture & aquaculture; 2.1 - Annual & perennial non-timber crops; 2.3 - Livestock farming & ranching; 4 - Transportation & service corridors; 4.3 - Shipping lanes; 9 - Pollution; 9.3 - Agricultural & forestry effluents	This species has a limited range (<2000 sq. km) and although threats have not been well documented, decline at some localities have been noted based on competition with another crayfish species. It has been shown to be intolerant to point source pollution and has an extremely restricted range and is known from at least 30 localities.			LC - Least concern	Vulnerable	0	0	0	0	0	0	0	0	1	1	1	0	positive 90 day in 2011 --Maria Papadopoulos	1	0	Will Harlan
107151	Hesperia uncas grandiosa	Railroad Valley Skipper	Butterflies and Skippers	G5T1	T1	2001-12-07	2005-04-26	US	N1	N1	2001-12-07	NV (S1)	A = 1 - 5	Currently only one EO mapped, although another EO may exist in Big Smokey Valley.	D = 1000 - 2500 individuals						Vulnerable to drought, overgrazing (a serious problem along with rechannelization in White River Valley), and drawdown of water.		Element occurs in only one or two two valleys and is threatened by drought, overgrazing, and drawdown. There may be only a single occurrence.					1	0	0	0	1	0	0	0	1	0	0	1	negative 90-day finding in 2011	1	0	Patrick Donnelly
108134	Pseudotremia momus	a millipede	Millipedes and Centipedes	G2	G2	1989-07-28	2022-04-12	US	NNR	NNR		VA (S2)	A = 1 - 5	There are four known occurrences, however there is very limited inventory. Forested habitats in both karst and nonkarst areas would likely turn up additional occurrences.	U = Unknown		U = Unknown		U = Unknown		Most of the range and vicinity of known occurrences is a mosaic of agriculture, forested land including silviculture, and low density rural housing. The McMullin Cave occurrence is immediately adjacent to US Interstate highway 81, and the cave stream receives untreated stormwater runoff from the highway. Atwells Tunnel Cave receives runoff from two rural, paved roads - State Route 42 and Smyth Co…	1 - Residential & commercial development; 1.1 - Housing & urban areas; 2 - Agriculture & aquaculture; 2.3 - Livestock farming & ranching; 4 - Transportation & service corridors; 4.1 - Roads & railroads; 5 - Biological resource use; 5.3 - Logging & wood harvesting; 6 - Human intrusions & disturbance; 6.1 - Recreational activities; 8 - Invasive & other problematic species, genes & diseases; 8.1 - I…	This species has a limited range and few occurrences and is subject to several threats.					1	0	0	0	0	1	0	0	1	0	0	0		1	0	Noah Greewald
107202	Paucicalcaria ozarkensis	a microcaddisfly	Caddisflies	G1	G1	2005-03-31	2017-12-05	US	N1	N1	2005-03-31	AR (S1)	B = 6 - 20						U = Unknown	No information on population trend is available.	Natural gas development is currently active and threatening at least one stream where this species is known to occur.	3 - Energy production & mining; 3.1 - Oil & gas drilling	This species is rare, has a restricted habitat, and is threatened by natural gas development.					1	0	0	0	0	0	0	0	1	0	0	0		1	0	Will Harlan
107246	Papilio joanae	Ozark Swallowtail	Butterflies and Skippers	G2?	G2	2019-08-25	2019-08-25	US	N3	N3	1998-09-01	AR (S2), KY (SNA), MO (S1S2)	B = 6 - 20	This rare and difficult to identify species is known from a limited number of localities in Missouri and perhaps one or two in Arkansas (BAMONA 2019).			U = Unknown	Discovered too recently to evaluate long term trend, although the species has declined somewhat due to habitat loss and more recently by hybridization.	BE = Decline of 30-90%	This species is very rarely recorded. Apparently there is only one publicly available record and one other from the period 2010-2019 (Dupuis and Sperling 2016, BAMONA 2019, S. Buback, pers. comm. 2019). The species was formerly more common, suggesting that the species has undergone a decline of some magnitude. The difficulty in confirming identifications complicates trend assessment.	Moderately threatened now but threat likely to increase greatly if Spongy Moth (Lymantria dispar) spraying becomes widespread in Missouri. Spongy Moth will become a generalized problem, at least short term and likely long term, there in the early 21st century. Presumably recolonization will occur in small spray blocks, but large suppression or eradication projects using BTK (especially if sprayed…	5 - Biological resource use; 5.1 - Hunting & collecting terrestrial animals; 7 - Natural system modifications; 7.1 - Fire & fire suppression; 8 - Invasive & other problematic species, genes & diseases; 8.2 - Problematic native species/diseases; 9 - Pollution; 9.5 - Air-borne pollutants	This species has a very restricted range and is known from few records. The extreme scarcity of records from 2010-2019 suggests that the species has declined. The difficulty in confirming identifications complicates status assessment. Threats are almost certain to increase within a few decades when Spongy Moth (Lymantria dispar) becomes a widespread pest in the Ozarks, which will likely result in…					0	1	0	0	0	0	1	0	1	0	0	0	Other factors is spraying for spongy moth.	1	1	Noah Greewald
107247	Isoperla szczytkoi	Magazine Stripetail	Stoneflies	G1	G1	1999-09-20	2017-12-01	US	N1	N1	1999-09-20	AR (S1)	A = 1 - 5						U = Unknown	No information on population trend is available.	Several gas wells have been developed in the basin of the only stream that this species is known to occur in since the last review of this species (Google Earth 2017 Time Lapse Imagery). It is a first order, intermittent stream; further gas well development resulting in water withdrawals, sediment input, and potential contamination from accidental spills and recovered water may impact water quali…	3 - Energy production & mining; 3.1 - Oil & gas drilling	Known only from the type locality, Gutter Creek, draining Magazine Mountain, Logan Co., Arkansas. This drainage basin has experienced natural gas development over the last 15 years, likely placing stress on the stream and species, putting it and other aquatic invertebrates at great risk.					1	0	0	0	0	0	0	0	1	0	0	0		1	0	Will Harlan
107306	Pseudanophthalmus jonesi	Grassy Cove Cave Beetle	Other Beetles	G1G2	G1	2002-08-21	2008-04-15	US	N1N2	N1	2002-08-21	TN (S1S2)	A = 1 - 5	Lewis (2005) documented cave occurrences in Tennessee in Blowhole Cave, Grassy Cove Saltpeter, and Mill Cave in Cumberland Co.			U = Unknown		U = Unknown		Toxic chemical spills, discharges of large amounts of polluted water, trash dumping, vandalism, disruption of nutrient input, closure of entrances, alteration of entrances, or the creation of new entrances are among the threats that USFWS lists as having have serious adverse impacts on cave beetles and could result in extirpation of populations. In addition, in caves that have above ground water …		This species could be ranked as G1 based on current information, but since it is not limited to one cave it might turn up in a few more than the three now documented (Lewis, 2005) so the G2 part of the rank range reflects this uncertainty. Also Tennessee, the only state where it occurs, ranks it as S1S2.					1	0	0	0	0	0	0	0	1	0	0	0		1	0	Will Harlan
107343	Tinostoma smaragditis	Fabulous Green Sphinx of Kauai	Sphinx Moths	G1G2	G1	2000-08-23	2006-11-28	US	N1N2	N1	2000-08-23	HI (S1S2)	A = 1 - 5	Two remnant populations discovered in 1998. It is unclear from USFWS information how many occurrences the six historic collection sites actually represented.	AD = 1 - 2500 individuals	This is an educated guess. There is probably no practical way to estimate population size for a nocturnal sphinx moth. However, only 17 individuals have ever been collected or observed (USFWS, 1998) despite some effort. This suggests, but does not prove, that numbers are very low. Foodplant unknown.			F = Decline of 10-30%	Quite possibly A. Not enough information but apparent habitat greatly reduced and impacted by exotics.	The usual factors for native Hawaiian Lepidoptera apparently all apply: development of native habitats on Kauai, alien plants, alien arthropods including ants and out of control biocontrol parasitoids, disruption by feral ungulates. It is also quite possible the bright lights aluded to by USFWS (1998) near Kalalau Lookout are depleting populations below, but this cannot be assumed based on the li…	1 - Residential & commercial development; 1.1 - Housing & urban areas; 2 - Agriculture & aquaculture; 8 - Invasive & other problematic species, genes & diseases; 8.1 - Invasive non-native/alien species/diseases; 11 - Climate change & severe weather; 11.4 - Storms & flooding	Re-discovered at two sites (one or two populations) in 1998 by Mandy Heddle and known from two others in that decade. All information suggests this species is apparently endemic to fragmented mesic forests on Kauai, apparently faces the usual suite of threats from exotics, and is apparently very scarce now. Based on all these factors it appears to be imperiled or perhaps critically so as of the l…			EN - Endangered		1	0	0	0	1	1	0	0	1	1	0	0		1	0	Noah Greewald
107346	Cicindela highlandensis	Highlands Tiger Beetle	Tiger Beetles	G2G3	G2	2014-09-30	2014-09-30	US	N2N3	N2	2014-09-30	FL (S2S3)	AB = 1 - 20	Although Knisley (2005) reports this species from 40 "sites", many of these areas are very close to each other. There are approximately 5-10 populations, although dispersal, recruitment and related aspects of its biology need to be studied to reach any firm conclusions. Following the 2001 NatureServe "Population/Occurrence Delineation" for Cicindelidae: eastern sand barren and scrub taxa, there a…	E = 2500 - 10,000 individuals	Knisley (2005) estimated total population size at between 3000 to 4000 individuals.	AC = Decline of >70%	Turner et al (2006) stated that scrub and sandhill habitat on the Lake Wales Ridge have declined to 12.9% of their former area since pre-settlement times.	FG = Decline of <30% to relatively stable		Habitat loss and degradation is the most severe threat. Scrub is subject to destruction for development and citriculture and is also lost to increasing vegetation density from ecological succession and suppression of fire. Some sites are now extremely small in area and isolated from other suitable habitat. It is unclear whether populations are isolated or demes in metapopulations and information …	1 - Residential & commercial development; 1.1 - Housing & urban areas; 2 - Agriculture & aquaculture; 2.1 - Annual & perennial non-timber crops; 5 - Biological resource use; 5.1 - Hunting & collecting terrestrial animals; 6 - Human intrusions & disturbance; 6.1 - Recreational activities; 7 - Natural system modifications; 7.1 - Fire & fire suppression	There are five to ten populations of this species, with each of these populations made up of collections of smaller sites (Almquist 2009, Knisley 2005). Most known sites are on managed lands, but the habitat may not be being properly managed for this species. This species requires well-managed scrub or sandhill habitat on a portion of the Lake Wales Ridge in Florida, USA. Turner et al (2006) stat…					1	0	0	0	0	0	1	0	1	0	0	0		1	0	Will Harlan
107348	Libellula jesseana	Purple Skimmer	Dragonflies and Damselflies	G1	G1	2007-02-02	2013-09-04	US	N1	N1	2007-02-02	FL (S1)	B = 6 - 20	Known from 15 lakes. Probably occurs on four times as many lakes, most of which would be on private property requiring permission to survey. Might occur in a few lakes of adjacent Georgia and Alabama, but not many.	F = 10,000 - 100,000 individuals	Assuming a few hundred at each lake and one hundred suitable lakes, the population size would be in the 30 to 40 thousand range.	DE = Decline of 30-70%	This long-term trend ranking is only an estimate and requires further research into the population trends of this species in areas that have not yet been recently surveyed as well as on private property.	F = Decline of 10-30%	Florida's lakes are being rapidly developed, and most will probably be eutrophicated by lawn fertilizers and septic tank outflows, which will allow L. JESSEANA to be outcompeted by the more common L. AURIPENNIS.	Threatened due to explosive population growth in Florida, especially around the type of lake where this species occurs.Florida's lakes are being rapidly developed, and most will probably be eutrophicated by lawn fertilizers and septic tank outflows, which will allow L. jesseanna to be outcompeted by the common L. auripennis.	1 - Residential & commercial development; 1.1 - Housing & urban areas; 1.3 - Tourism & recreation areas; 7 - Natural system modifications; 7.2 - Dams & water management/use; 9 - Pollution; 9.1 - Domestic & urban waste water; 9.3 - Agricultural & forestry effluents	This species had previously been ranked G2 based on recently documented occurrences at the suggestion of Sid Dunkle. Although it is suspected that additional occurrences of this species probably exist in addition to the known ones, the assigned global rank must also reflect the rapid development of sand bottom lakes in Florida and the sensitivity of this species to eutrophication. According to Je…			VU - Vulnerable		1	0	0	0	0	0	0	0	1	1	1	0	positive 90 day in 2011 --Maria Papadopoulos	1	0	Will Harlan
107371	Colligyrus depressus	Harney Basin Duskysnail	Freshwater Snails	G1	G1	2000-06-01	2019-12-18	US	N1	N1	2000-06-01	OR (S1)	A = 1 - 5	This species is known from 4 occurrences. Found at a group of Harney County springs clustered within 2 miles of each other, and one spring in Lake County. Discovery of this taxon occurred as part of Hershler's (1999) Great Basin hydrobiid project, which involved visits to over 2,000 Great Basin sites, suggesting additional sites are likely to be few. However, much potential habitat for this speci…		It should be emphasized here that discovery of this taxon occurred as part of Hershler's (1999) Great Basin hydrobiid project, which involved visits to over 2,000 Great Basin sites. Thus additional sites are likely to be few.	U = Unknown		U = Unknown	This species has only been known since 1999 (Hershler 1999), and trends during that period are unknown.	Most known occurrences are small and isolated. Any actions that degrade the spring habitat will threaten the species, including livestock grazing, spreading salt for big game hunting, recreational activities, increase in catastrophic wildfire and associated use of fire retardant chemicals (Foltz Jordan 2012).	2 - Agriculture & aquaculture; 2.3 - Livestock farming & ranching; 2.3.2 - Small-holder grazing, ranching or farming; 6 - Human intrusions & disturbance; 6.1 - Recreational activities; 7 - Natural system modifications; 7.1 - Fire & fire suppression; 7.1.1 - Increase in fire frequency/intensity; 9 - Pollution	This species is found at four sites over two counties in southeast Oregon. This species is under-surveyed so it is possible that comprehensive surveys will discover additional sites.			VU		1	0	0	0	1	0	0	0	1	0	0	0		0	0	Noah Greewald
107391	Antrorbis breweri	Manitou Cavesnail	Freshwater Snails	G1	G1	2002-08-21	2008-10-16	US	N1	N1	2002-08-21	AL (S1)	A = 1 - 5	It is presently known only from a single locality, a cave in Fort Payne, Alabama (Hershler and Thompson, 1990), however, it has only recently been described.	BD = 50 - 2500 individuals	The snails were extremely scarce when collected (Hershler and Thompson, 1990).	U = Unknown		U = Unknown		The cave habitat, when visited during the initial collection, was somewhat disturbed. The cave was formerly a commercial cave and, at the time of description of the species, had been closed to the public since 1980 with a large metal door over the opening serving as the entrance (Hershler and Thompson, 1990).		This species, recently described in 1990, is only known from a single cave locality with an occurrence extent of less than 100 square km and an occupied area of approximately 4-20 square km. It has a current restricted distribution and habitat disturbance could potentially cause its extinction.			VU - Vulnerable		1	0	0	0	0	0	0	0	1	1	1	0	positive 90 day in 2011 --Maria Papadopoulos	1	0	Will Harlan
107397	Fallicambarus strawni	Saline Burrowing Crayfish	Crayfishes	G1G2	G1	1996-02-19	2009-07-01	US	N1N2	N1	1996-02-19	AR (S1)	B = 6 - 20	It is known from 13 locations.	DF = 1000 - 100,000 individuals	Could be less than 1000 individuals but likely not.	U = Unknown		U = Unknown		Habitat destruction and degradation are the main threats to all Fallicambarus crayfishes. Also, the more widely distributed species can be vulnerable to loss of suitable habitats or habitat fragmentation at range edges; as well as habitat modification for agriculture and wetland destruction. The second most important cause for imperilment is pollution (including air, water and soil pollution as t…	2 - Agriculture & aquaculture; 7 - Natural system modifications; 7.2 - Dams & water management/use; 8 - Invasive & other problematic species, genes & diseases; 8.1 - Invasive non-native/alien species/diseases; 11 - Climate change & severe weather; 11.1 - Habitat shifting & alteration	It has a limited range from small portions of the Red and Ouachita River drainages (Saline River basin) in Howard, Pike, and Sevier counties, Arkansas (Hobbs, 1989; Robison and Allen, 1995). Threat and trend information are not known.			LC - Least concern	Threatened	1	0	0	0	0	1	0	0	1	1	1	0	positive 90 day in 2011 --Maria Papadopoulos	1	0	Will Harlan
107438	Hygrotus fontinalis	Travertine Band-thigh Diving Beetle	Predaceous Diving Beetles	G1	G1	1989-04-28	2022-10-23	US	NNR	NNR		CA (S1)	B = 6 - 20	There are likely fewer than 20 occurrences of this species. Leech (1966) reports that the nearest potentially suitable habitat is 175 miles away from the only known location. Subsequently, Challet (1987) suggested it is likely more widespread suggesting there remains disagreement on the speculated extent of this species range in California.	U = Unknown		G = Relatively Stable (<=10% change)	The long-term trend of this species is likely stable as the realized threats didn't exist or were far less severe in that time frame.	F = Decline of 10-30%	The short-term trend of this species is likely one of decline based on on-going threats.	Recreational activities, including swimming and bathing, while seemingly benign, introduce pollutants and effect water temperature and humidity upon which this species relies. Excessive ground water pumping is also an on-going threat to this species. The primary threat to this species is intensive recreational use associated with use of the hot springs for bathing and swimming. In general, recrea…	6 - Human intrusions & disturbance; 6.1 - Recreational activities; 7 - Natural system modifications; 7.2 - Dams & water management/use; 7.2.7 - Abstraction of ground water (agricultural use)	This apparently narrowly endemic aquatic cave specialist is subject to on-going threats from recreational activities and excessive ground water extraction.			NE		1	0	0	0	1	0	0	0	1	0	0	0		1	0	Jeff Miller
107563	Papaipema duplicatus	Dark Stoneroot Borer Moth	Papaipema Moths	G1G2	G1	2023-09-27	2023-09-27	US	N2N4	N3	2001-04-23	DE (SH), KY (S2), NC (SH), NJ (SH), NY (SNR), PA (S1S2), VA (S2)	AB = 1 - 20	This species is known from at least 7 occurrences using a 2 km separation distance and records from 1993-2023 available through GBIF, SCAN, and as reported in the literature, and there could be several more in Virginia (Schweitzer et al. 2011; GBIF 2023; SCAN 2023).		Usaully quite scarce where found but has been taken abundantly (over 40 in one night) at one site in the Virginia mountains and used to be rather common in Delaware.	D = Decline of 50-70%	This species has not been documented from the northeastern part of its range in recent decades, including from Connecticut, New York, New Jersey, Delaware, where it was once considered abundant, and North Carolina (Schweitzer et al. 2011; GBIF 2023; SCAN 2023).	F = Decline of 10-30%	This species has only been documented in Pennsylvania, Virginia, and Indiana from 2013-2023 in a few occurrences (GBIF 2023; SCAN 2023; iNaturalist 2023).	Habitat loss and fragmentation through development, invasive species, and overgrazing of its host plant and thus direct predation by deer (Schweitzer et al. 2011).	1 - Residential & commercial development; 1.1 - Housing & urban areas; 8 - Invasive & other problematic species, genes & diseases; 8.1 - Invasive non-native/alien species/diseases; 8.1.1 - Unspecified species; 8.2 - Problematic native species/diseases; 8.2.2 - Named species	This species has a moderate range, few occurrences, several threats, and long-term population declines.					1	0	1	0	0	0	0	0	1	0	0	0		1	0	Noah Greewald
107613	Argia rhoadsi	Golden-winged Dancer	Dragonflies and Damselflies	G2G3	G2	1999-01-21	2008-12-01	US	N1N2	N1	2008-12-01	TX (S2?)	BC = 6 - 80	This species is presently known from only two localities in the United States: Fort Clark Springs in Kinney County, Texas and historically from the Lower Rio Grande Valley, Texas (Abbott, 2005), where it is likely extirpated (Dunkle, 2004). It is known from less than 20 sites in six states of northeastern Mexico (Hidalgo, Nuevo Leon, Puebla, San Luis Potosi, Tamaulipas, and Veracruz) (Paulson and…	FH = 10,000 to >1,000,000 individuals	Probably thousands on each river.	U = Unknown		F = Decline of 10-30%	Probably declining due to pollution, pesticide use, and overgrazing.	Pressure on arid-land streams; agricultural development. Other threats may include pollution, pesticide use, and overgrazing.	2 - Agriculture & aquaculture; 2.1 - Annual & perennial non-timber crops; 2.3 - Livestock farming & ranching; 7 - Natural system modifications; 7.2 - Dams & water management/use; 9 - Pollution; 9.3 - Agricultural & forestry effluents	Only known from two localities in the United States and is rarely collected (though one population is well-established in Kinney County, Texas). One population has probably been extirpated from the lower Rio Grande River in south Texas by the effects of agricultural development. Known from less than 20 sites in Mexico. Not much is known on the biology of this species.			LC - Least concern		1	0	0	0	0	0	0	0	1	0	0	0		1	0	Krista Kemppinen
107646	Eanus hatchi	Hatch's Click Beetle	Other Beetles	G1	G1	2010-08-24	2010-08-24	US	N1	N1	2010-08-24	WA (S1)	A = 1 - 5	Four populations are known, all in WA; King's Lake and Snoqualmie Bogs, Lake Marie, and Chase Lake. Significant areas have not been surveyed during the proper time period. It was historically known from Sphagnum bogs in Snohomish and King counties, Washington, although the species may be extirpated at both of the Snohomish County sites (Chase Lake and Carkeek Park) in which case the only extant p…			E = Decline of 30-50%		E = Decline of 30-50%	In the Seattle are, much of the available habitat for this species has been heavily altered or eliminated by urban development, and the species may be extirpated at both of the known sites (Chase Lake and Carkeek Park).	Global warming could pose a long-term threat. Development and logging the affect water quality and quantity, insecticide use, and trampling threaten various sites. Patches of suitable habitat are very small within the species range, and the number of populations of this species has probably declined severely as many low elevation bogs in Washington have been damaged or destroyed. Both urban devel…		Known from only a small part of 2 counties at four sites and in decline with possible extirpation at two sites; endemic to Sphagnum bogs in the Puget Sound area of Washington.			NE - Not evaluated		1	0	0	0	0	0	0	1	1	1	0	0		1	0	Noah Greewald
107648	Pseudanophthalmus calcareus	Limestone Cave Beetle	Other Beetles	G1	G1	2002-08-21	2008-04-15	US	N1	N1	2002-08-21	KY (S1)									Toxic chemical spills, discharges of large amounts of polluted water, trash dumping, vandalism, disruption of nutrient input, closure of entrances, alteration of entrances, or the creation of new entrances are among the threats that USFWS lists as having have serious adverse impacts on cave beetles and could result in extirpation of populations. In addition, in caves that have above ground water …							1	0	0	0	1	0	0	0	1	0	0	0		1	0	Will Harlan
107666	Somatogyrus alcoviensis	Reverse Pebblesnail	Freshwater Snails	G1Q	G1	1999-03-23	2008-11-05	US	N1	N1	1999-09-14	GA (S1)	A = 1 - 5	A revisit to 21 sites in the upper portion of the Ocmulgee River drainage in Georgia in 1995 found this species at only two sites: the Alcovy River at Factory Shoals, and the Yellow River at Cedar Shoals (the same sites as originally described) (Watson, 2000).	U = Unknown		FH = Decline of <30% to increase of 25%		G = Relatively Stable (<=10% change)	A revisit to 21 sites in the upper portion of the Ocmulgee River drainage in Georgia in 1995 found this species at only two sites: the Alcovy River at Factory Shoals, and the Yellow River at Cedar Shoals (the same sites as originally described) (Watson, 2000). It was not found at several sites with apparently suitable habitat in the upper Ocmulgee River drainage and there is little additional sui…	Growth and development in the Atlanta area is a potential threat (Watson, 2000).		Altough recently considered potentially extinct, this species has been found to be restricted to two locations in Georgia. Although suitable habitat does exist, no new populations have been discovered beyond the type locality and the second newly discovered locality (total area occupied is less than 20 square km). Potential threats include development and human settlement in the area.			EX - Extinct		1	0	0	1	0	0	0	0	1	0	0	0		1	0	Will Harlan
107696	Phyllophaga elizoria	Elizoria June Beetle	Other Beetles	G2	G2	2011-07-11	2011-07-11	US	NNR	NNR		FL (S2)	A = 1 - 5	Woodruff & Beck (1989) list seven localities, but six of these were based on collection of less than five specimens.	U = Unknown		U = Unknown		U = Unknown		Development of Lake Wales Ridge sand pine scrub habitat, Florida, USA.		Only known from Known from sand pine scrub habitat in Brevard, Highlands, Okeechobee, Palm Beach and Polk counties, Florida, USA. Woodruff & Beck (1989) list seven localities, but six of these were based on less than five specimens per site. The only apparently viable, and protected, occurrence is at Archbold Biological Station in Highlands County. Almost nothing is known about this species life …					1	0	0	0	1	0	0	0	1	0	0	0		1	0	Will Harlan
107733	Partulina proxima	an achatinellid land snail	Terrestrial Snails	G1	G1	1990-08-07	1990-08-07	US	N1	N1	2003-06-18	HI (S1)	B = 6 - 20	7 CURRENT & 1 HISTORICAL OCCURRENCE. It was recently collected in small numbers (2 specimens) from eastern Molokai for a phylogenetic study (Holland and Hadfield, 2004).	AC = 1 - 1000 individuals	TOTAL ESTIMATED POPULATION OF RECENT RECORDS MAY BE ABOUT 100 SNAILS (U88HAD01).				It was recently collected in small numbers (2 specimens) from eastern Molokai for a phylogenetic study (Holland and Hadfield, 2004).	THREATENED BY INTRODUCED PREDATORS (EUGLANDINA?, RATS, OXYCHILUS), HABITAT DESTRUCTION AND OVERCOLLECTING.		G1S1.3. SEVEN RECENT POPULATIONS KNOWN FROM FOUR AREAS.			EN - Endangered		1	1	0	0	1	1	0	0	1	1	0	0		1	0	Noah Greewald
107764	Oligocentria delicata	a notodontid moth	Notodontid Moths	G2G3	G2	2000-09-07	2007-05-24	US	N2N3	N2	2000-09-07	AZ (SNR), NM (SNR)									Threats to this species include its limited range. Most populations occur on lands within Coronado National Forest, but a few occur on nearby private lands. Housing development and clearing on private lands and lack of the species consideration in National Forest management plans are threats to the species' continued survival.		Small range, housing development and clearing on private lands as well as lack of National Forest management plans that include this species' needs all contribute to the ranking.					1	0	0	1	0	0	0	0	1	0	0	0		1	0	Krista Kemppinen
107809	Leptoxis virgata	Smooth Mudalia	Freshwater Snails	G2	G2	1995-04-14	2020-10-12	US	N2	N2	1995-04-14	AL (SX), NC (SU), TN (S1), VA (SNA)	B = 6 - 20	There are at least six occurrences based on GBIF NatureServe data and a total of approximately 10 with records from Whelan (2013). Reported by Johnson et al. (2005) from the Hiwassee River inside and adjacent to Cherokee National Forest, Polk Co., Tennessee. Reports from the Hiwassee River in North Carolina are possibly in error (LeGrand et al., 2006). It appears to be secure in the Tennessee Riv…	U = Unknown		E = Decline of 30-50%	In Alabama, it historically it occurred in the Tennessee River downstream to northeastern Alabama. It has been eliminated from the Tennessee River, Alabama, following construction of Nickajack and Guntersville Dams. Currently it occurs in approximately 40% of its original distribution and remaining populations are reproducing (Mirarchi, 2004). Comparing GBIF records from pre and post 2000, the to…	U = Unknown		Anything that adversely affects water quality, such as pollution, siltation or degradation of surrounding habitat would be a threat to this species, but no ongoing threats have been documented to be affecting this species. Dams have affected some populations in the past.	7 - Natural system modifications; 7.2 - Dams & water management/use; 7.2.11 - Dams (size unknown)	This species is occurs in a relativley small area primarily in the Tennessee River and tributaries in the southeastern US. It had declined in many areas, but its total range is approximately the same as its historical range.			VU		1	0	0	0	0	0	0	0	1	1	1	0	positive 90 day in 2011, but withdrawn.	1	0	Will Harlan
107814	Pleuronaia barnesiana	Tennessee Pigtoe	Freshwater Mussels	G2G3	G2	1996-11-25	2011-12-19	US	N2N3	N2	1996-11-25	AL (S1), GA (S1), MS (S1), NC (S1), TN (S2S3), VA (S2)	BC = 6 - 80	Historical distribution has been severely fragmented but continues to be sporadically distributed throughout its former range in very low density populations. In North Carolina, it is known only from the Hiwassee and Little Tennessee River basins (Bogan, 2002) in Macon and Swain Cos. (LeGrand et al., 2006). In Alabama, extant in several Tennessee River tributaries, including Limestone and Round I…	E = 2500 - 10,000 individuals	Present populations appear to exist at very low densities but its persistence in considerable numbers in several tributary systems of the Tennessee (Little Pigeon and Hiwassee) suggests the present classification.	E = Decline of 30-50%	The big river form, Fusconaia barnesiana tumescens, apparently disappeared with the establishment of the Tennessee River reservoirs, but Fusconaia barnesiana barnesiana and Fusconaia barnesiana bigbyensis still occur, often as one of the most abundant mussels present, in many of the small to medium-sized rivers in east and middle Tennessee. Current populations are now more reduced or localized (P…	DE = Decline of 30-70%	Populations continue to be lost at a high rate. TVA data indicates a sharp drop in occurrence in the Clinch River over the last 10 years. In Tennessee, it was known from the Emory, Watauga, French Broad, Holston, Sequatchie, and Tennessee Rivers but only prior to 1960 (Parmalee and Bogan, 1998). It is questionable as to whether this species still occurs in Georgia but it may still be surviving in…	Chemical and organic pollution, alteration and inundation of river channels, siltation from agricultural and clear-cutting, and toxic run-off from coal mines have and continue to impact this species severely.	7 - Natural system modifications; 7.2 - Dams & water management/use; 9 - Pollution; 9.2 - Industrial & military effluents; 9.3 - Agricultural & forestry effluents	Range has been markedly reduced and fragmented; as well as declining with area of occupancy is less than 5000 sq. km, however it is still found in considerable numbers in a few small streams and rivers and a reasonable number of occurrences still remain that can be considered viable.			LC - Least concern	Special Concern	1	0	0	0	0	0	0	0	1	1	1	0	positive 90 day in 2011 --Maria Papadopoulos	1	0	Will Harlan
107816	Crangonyx hobbsi	Hobb's Cave Amphipod	Amphipods	G2G3	G2	2007-08-08	2014-04-16	US	N2N3	N2	2007-08-08	FL (S2S3)	BC = 6 - 80	More than three dozen occurrences known, all in submerged caves in Florida, USA (Walsh, 2001); additional, undiscovered occurrences may exist. Zhang and Holsinger (2003) list Alachua, Citrus, Columbia, Dade, Gilchrist, Hernando, Leon, Levy, Madison, Marion, Pasco, Suwanne, and Walkulla counties.	FH = 10,000 to >1,000,000 individuals	Local populations can fluctuate dramatically, so that it can become very common at some cave sites, at least temporarily.	U = Unknown		U = Unknown		Presumably sensitive to degradation of aquifers (pollution), alteration (especially reduction) of detrital flow, and saltwater intrusion that may accompany excessive water withdrawal (for agriculture, industry, and human consumption) or sea level rise.		Endemic to Florida; although it has a fairly wide range within the state, most occurrences lack adequate protection. As a cave species, it is probably quite fragile and sensitive to changes in habitat, especially water quality.			VU - Vulnerable		1	0	0	0	0	0	0	0	1	1	1	0	The Northern Suwannee River Basin Clade of Crangonyx hobbsi is now designated as C. parhobbsi (Cannizzaro et al. 2020).	1	0	Will Harlan
107863	Amastra spirizona	an amastrid land snail	Terrestrial Snails	G1	G1	1990-08-07	1990-08-07	US	N1	N1	2003-06-12	HI (S1)	A = 1 - 5	15 RECORDS SINCE 1945 (1 RECENT 1988, 14 HISTORICAL 1946-1976) IN THE WAIANAE RANGE.	AC = 1 - 1000 individuals	NO ESTIMATE OF TOTAL POPULATION SIZE, LESS THAN 50 SEEN IN 1988.					THREATENED BY INTRODUCED PREDATORS (EUGLANDINA, RATS, OXYCHILUS), HABITAT DESTRUCTION AND OVERCOLLECTING.		G1S1.1. 1 RECENT OCCURRENCE AND ONLY 15 SINCE 1945 IN 5 GENERAL AREAS IN THE WAIANAE RANGE. POPULATIONS ARE POTENTIALLY THREATENED BY EUGLANDINA ROSEA. CONSIDERED TO BE EVEN RARER IN THE KOOLAU RANGE.			CR - Critically endangered		1	1	0	0	1	1	0	0	1	1	0	0		1	0	Noah Greewald
107872	Fluminicola seminalis	Nugget Pebblesnail	Freshwater Snails	G2	G2	1999-04-19	2020-11-02	US	N2	N2	1999-09-14	CA (S2)	B = 6 - 20	The nugget pebblesnail is known from about 44 (2012) occupied sites that can be assigned to five general geographic areas: Hat Creek and the Lower Pit River system and tributaries, Upper Fall Creek, Ash Creek, the lower McCloud River, and Battle Creek, Shasta County, California (USFWS 2012).	U = Unknown		E = Decline of 30-50%	Hershler and Frest (1996) describe the historical distribution of the nugget pebblesnail from the mouth of the Sacramento River throughout the river system but it is now extirpated in the lower river system primarily as a result of the 1991 Cantara pesticide spill.	U = Unknown	Short-term trend for the nugget pebblesnail is unknown.	Threats include water pollution caused by livestock in stream channels and springs and sedimentation from legacy logging, mining, road and railroad construction. Invasive species and sedimentation from wildfires are additional threats (Furnish and Monthley 1998, USFWS 2012). Twelve of the known 2012 44 occupied sites are in the Pit River system below Lake Britton and subject to varying flows and …	7 - Natural system modifications; 7.2 - Dams & water management/use; 8 - Invasive & other problematic species, genes & diseases; 8.1 - Invasive non-native/alien species/diseases; 8.5 - Viral/prion-induced diseases; 9 - Pollution; 9.1 - Domestic & urban waste water; 9.1.2 - Run-off; 9.2 - Industrial & military effluents; 9.2.1 - Oil spills; 9.3 - Agricultural & forestry effluents; 9.3.2 - Soil ero…	The nugget pebblesnail's historical range likely included the mainstem Sacramento River and tributaries where it is now extirpated. The substantially reduced range of the nugget pebblesnail and continuing threat factors make it a highly vulnerable taxon.			DD		1	0	0	0	0	0	0	0	1	1	0	1	negative 12 month in 2012.	1	0	Krista Kemppinen
107881	Ashmunella macromphala	Cook's Peak Woodlandsnail	Terrestrial Snails	G1	G1	2002-10-08	2005-10-14	US	N1	N1	2002-10-08	NM (S1)	A = 1 - 5	Two occurrences were found by Vagvolgyi (1974), and Metcalf and Smartt (1997) collected specimens in 1988 at sites like those described by Vagvolgyi. The two described are approximately 400 m apart and could be a single occurrence. If more occurrences are found, they will be in close proximity to the two documented. Also OK Canyon (Lang, 2000).	AC = 1 - 1000 individuals	May be abundant at one of the two rock slides where Vagvolgyi (1974) found them, because he was able to find 80-90 live individuals in dry weather after weeks of no rain. Woodlandsnails are sensitive to dry weather and tend to retreat into moist areas below ground. While the size of the rock slides was not given, typically, rock slides associated with steep slopes in southern New Mexico are no mo…			F = Decline of 10-30%	Fossil shells found at the base of the northern slope of the occupied mountain indicate the the range of the species has contracted over time. This situation is not uncommon for species in the genus, which is restricted to mountains in the Southwest and northern Mexico. Range contraction is attributed to drying of the climate since the Pleistocene (Metcalf and Smartt, 1997) and suggests that the …	Based on fossil evidence that the range has contracted up the mountain occupied by the species (Metcalf and Smartt, 1997), climate warming appears to be a threat. The site is remote and not easily accessed and does not appear to have recreation values that would threaten the species. The base of the mountain and the region in general has been shaft mined extensively in the past, and mining is act…		Although the species appears to have relatively good passive protection, its extremely narrow range and low number of occurrences argue for a rank of critical imperilment.					1	0	0	0	1	0	0	1	1	1	1	0	Krista Kemppinen: other factors: wildfire.	1	1	Krista Kemppinen
107883	Crinodes biedermani	a notodontid moth	Notodontid Moths	G2?	G2	2014-05-01	2014-05-01	US	N1	N1	2000-09-07	AZ (S1)	BC = 6 - 80				U = Unknown		U = Unknown		Threats to this species include its limited range. Only two populations occur on lands within Coronado National Forest, but others occur on military and private (including TNC) lands. Housing development and clearing on private lands and lack of the species consideration in National Forest management plans are potential threats to the species' continued survival. The moderate range is also suscep…		Populations seem well enough distributed in the Huachucas that G1 probably is not appropriate. It is unlikely that a population in San Luis Potosi, Mexico would be disjunct. Thus assuming the specimen is not mislabelled, there must be some intermittent populations. If occurrence of this moth in Mexico well south of the USA border is confirmed the rank would need to be re-evaluated. The available …					1	0	0	1	0	1	0	0	1	0	0	0	Krista Kemppinen: other factors: stochastic events such as fire, inadvertent management actions that might be to the species' detriment	1	1	Krista Kemppinen
107928	Tryonia diaboli	Devil Tryonia	Freshwater Snails	G1	G1	2000-06-22	2011-12-15	US	N1	N1	2000-06-22	TX (SNR)	A = 1 - 5	A known record is Phantom Lake in Reeves, Texas from 1934 (INHS record) as well as the type locality in Devil's River and Rio San Felipe in Val Verde Co. (Pilsbry and Ferriss, 1906).			A = Decline of >90%		U = Unknown		Sites today are heavily impacted by development and encroachment in an urban areas paved through a golf course (K. Perez, pers. comm., 2010).		It is known historically from two or three disjunct old occurrences in Texas only. Sites today are heavily impacted by development and encroachmen but there is no evidence of decline.			EN - Endangered		1	0	0	0	0	1	0	0	1	0	0	0	Krista Kemppinen: other factors (drought) and invasive species coded from IUCN (2012) Red List assessment.	1	1	Krista Kemppinen
107950	Cambarus nerterius	Greenbrier Cave Crayfish	Crayfishes	G2	G2	2006-09-13	2009-07-01	US	N2	N2	2006-09-13	WV (S1?)	B = 6 - 20	Known from a single cave in Pocahontos County and 15 caves or springs in Greenbrier County, West Virginia (Loughman and Welsh, 2010). Jezerinac et al. (1995) reported 16 collections from a series of caves in Pocahontas Co., West Virginia. Many of the localities are individual caves and not part of a larger system. Approximately 40 caves were surveyed and most did not harbor the species.	E = 2500 - 10,000 individuals	There is some population information available for sub-populations of Cambarus nerterius found in the Bransford and McLaughlin-Unus caves. Nine stations within these caves were sampled monthly from October 1978 through to November 1979, using baited, modified minnow traps. In total, 198 individuals were processed, suggesting a much larger sub-population than originally thought by Lincoln-Peterson…	FH = Decline of <30% to increase of 25%		G = Relatively Stable (<=10% change)		Many of the uninhabited caves surveyed by Jezerinac et al. (1995) were being used (at the mouth) by cattle as a heat refuge in the summer and large quantities of manure was entering the cave system. It was believed the excess manure had distryed the habitat for the species. Many of the uninhabited caves looked to be suitable habitat. Populations have apparently been lost but having populations in…	1 - Residential & commercial development; 1.1 - Housing & urban areas; 3 - Energy production & mining; 3.1 - Oil & gas drilling; 9 - Pollution; 9.1 - Domestic & urban waste water; 9.3 - Agricultural & forestry effluents	This karst species is known from over a dozen disjunct occurrences (range extent less than 2000 sq. km) and its habitat is threatened by several factors (agriculture, pollution, flooding) although recently a few new occurrences were discovered.			NT - Near threatened	Endangered	1	0	0	0	0	0	1	0	1	1	1	0	positive 90 day in 2011 --Maria Papadopoulos_x000D_ 4.1.22: part of 404 SE species petition, still under review; IUCN has changed rank, but no survey efforts since 1980s, still considered threatened; created folder in Teams	1	0	Tamara Strobel
108005	Sonorella ashmuni	Richinbar Talussnail	Terrestrial Snails	G2	G2	2002-10-08	2019-10-29	US	N2	N2	2002-10-08	AZ (S2)	B = 6 - 20	This species was found at 7 locations in recent surveys with 4 additional historical locations. Type locality at the abandoned mine site, Richinbar, about 48.3 km (30 mi) southeast of Prescott at 1067 m (3500 ft) elevation, to the west of the Agua Fria River and 4.8 km (3 mi) east of Bumblebee.	U = Unknown		U = Unknown		U = Unknown		Habitat loss or degradation may impact native land snail populations. Activities that affect land snail habitat on Tonto National Forest may include: wildfires and prescribed burns, road and trail construction, and mining. Sonorella and Oreohelix species are vulnerable to any disturbance that would remove talus or rocky habitat and increase interstitial sedimentation, and for forestdwelling speci…	2 - Agriculture & aquaculture; 2.3 - Livestock farming & ranching; 2.3.2 - Small-holder grazing, ranching or farming; 3 - Energy production & mining; 3.2 - Mining & quarrying; 4 - Transportation & service corridors; 4.1 - Roads & railroads; 7 - Natural system modifications; 7.1 - Fire & fire suppression; 11 - Climate change & severe weather	Although thought to have a wide geographic distribution, it has limited occurrences and on-going/continuing threats.					1	0	0	0	0	0	0	0	1	0	0	0	Krista Kemppinen: other factors: wildfires, prescribed burns	0	1	Krista Kemppinen
108056	Oreohelix barbata	Bearded Mountainsnail	Terrestrial Snails	G2G3	G2	2023-01-29	2023-01-29	US	N1	N1	2002-10-08	AZ (S1), NM (S1)	B = 6 - 20	There is approximately three known occurrences in Arizona and ten in New Mexico.			U = Unknown	There has not been a baseline established or monitoring completed to establish short or long-term trends.	U = Unknown	There has not been a baseline established or monitoring completed to establish short or long-term trends.	The greatest threat to this species throughout the range is drought and the resulting increase in frequency and intensity of fire. The fires will cause direct mortality and decrease the debris and riparian vegetation where this snail often occurs. With the threat of intense wildfires, there also is an increase in controlled burns to reduce fuel loads in the area. Most recreational use of the area…	1 - Residential & commercial development; 2 - Agriculture & aquaculture; 2.3 - Livestock farming & ranching; 3 - Energy production & mining; 3.2 - Mining & quarrying; 6 - Human intrusions & disturbance; 7 - Natural system modifications; 7.1 - Fire & fire suppression; 7.1.1 - Increase in fire frequency/intensity; 11 - Climate change & severe weather; 11.2 - Droughts	This species is found in a restricted range between southwestern New Mexico and southeastern Arizona with moderate threats.					1	0	0	0	0	0	0	0	1	0	0	0	Krista Kemppinen: other factors: drought, fire, controlled burns	0	1	Krista Kemppinen
108073	Lithasia hubrichti	Big Black Rocksnail	Freshwater Snails	G1	G1	2023-03-21	2023-03-21	US	NNR	NNR	2006-11-29	MS (S1)	A = 1 - 5	There is one known extant occurrence.			U = Unknown	The long-term trend of this species is unknown. This species may have <span>occupied a larger historic range, but there are no documented records for the species other than the single locality at which it was found it in 2023 (C. Rezac, pers. comm. 2023).</span>	U = Unknown	The short-term trend of this species is unknown. A population was re-discovered in 2022, near the type locality in the Big Black River (T. Mann, pers. comm. 2023).	The main threat to this species is channelization in the Mississippi River of which the Big Black is a tributary stream. Expedited flow "pulls" on water in tributary streams, often triggering headcuts, a major cause of stream channel destabilization. Excessive siltation and pollution from fertilizer/pesticide/herbicide run-off from extensive agricultural areas on floodplain terraces along some re…	4 - Transportation & service corridors; 4.3 - Shipping lanes; 9 - Pollution; 9.3 - Agricultural & forestry effluents; 9.3.3 - Herbicides and pesticides	This species was previously considered to be extinct, but a single population was re-discovered in 2022 near the type locality. It is threatened by channelization of the Mississippi River.					1	0	0	0	0	0	0	0	1	0	0	0		1	0	Noah Greewald
108115	Auriculella crassula	an achatinellid land snail	Terrestrial Snails	G1	G1	1990-08-07	1990-08-07	US	N1	N1	2003-06-12	HI (S1)	A = 1 - 5	5 POST-1945 POPULATIONS KNOWN TO DATE (3-1972, 1-1980 AND 1-1982).	AC = 1 - 1000 individuals	NO ESTIMATES OF POPULATION SIZE, BUT UP TO 16 HAVE BEEN COLLECTED AT ONE LOCATION.					THREATENED BY INTRODUCED PREDATORS (EUGLANDINA, RATS, OXYCHILUS), HABITAT DESTRUCTION AND OVERCOLLECTING.		G1S1.2. ON WEST MAUI, ONLY 1 POPULATION LAST REPORTED IN 1982. ON EAST MAUI 1 POPULATION LAST REPORTED IN 1980 FROM PALIKEA AND 3 POPULATIONS REPORTED IN 1972 FROM ONE VALLEY.			DD - Data deficient		1	1	0	0	1	1	0	0	1	1	0	0	Surveys badly needed	1	0	Noah Greewald
108153	Hogna ericeticola	Rosemary Wolf Spider	Spiders and other Chelicerates	G1	G1	2005-12-07	2020-03-24	US	N1	N1	2020-03-24	FL (S1)	A = 1 - 5	There are approximately two occurrences in the FNAI database, although these have not been verified since 1985.	U = Unknown	Population size would likely not be useful for calculating conservation status rank even if it were known, as there could be many of these in a relatively small area, which would indicate a sense of security that is not warranted.	U = Unknown		U = Unknown		Ninety percent of this species' known habitat is unprotected and much of this unprotected habitat is threatened by development (Deyrup and Franz 1994).	1 - Residential & commercial development	This species has only been verified from sandhill habitat in a small, ca. 100 square kilometer, area in Putnam County, Florida, USA, although there are some more recent questionable records that should be investigated. Species that have small ranges and narrow habitat specializations have a greater chance of extinction than similar species with larger ranges and/or that are not habitat specialist…			DD		1	0	0	0	0	0	0	0	1	0	0	0		1	0	Will Harlan
108156	Distocambarus hunteri	Saluda Burrowing Crayfish	Crayfishes	G1	G1	2005-06-17	2009-07-01	US	N1	N1	2000-06-07	SC (SNR)	A = 1 - 5	Collected at two sites.							There are no known species specific major threats currently occurring, however, there is intended urban and commercial construction in the county of Saluda which would serious impact this species (Bristol et al. 2005). There are already urban areas close to the rivers in Saluda rivers.	1 - Residential & commercial development; 1.1 - Housing & urban areas; 1.2 - Commercial & industrial areas	Only known from two sites in a limited portion of one river drainage. So far only known from a limited portion of the Saluda River drainage in Saluda County, South Carolina. Extensive searches throughout the upper portions of the drainage failed to find more occurrences (Fitzpatrick and Eversole 1997). This species has an imminent threat in the form of construction in its very limited range and o…			VU - Vulnerable	Endangered	1	0	0	0	0	0	0	0	1	0	0	0		1	0	Will Harlan
108164	Belocephalus micanopy	Big Pine Key Conehead Katydid	Katydids and Crickets	G1	G1	2005-12-08	2013-12-31	US	NNR	NNR		FL (S1)	A = 1 - 5	Only found on Big Pine Key, Monroe County, Florida, USA.	U = Unknown		U = Unknown		U = Unknown		Threatened by development of pine woods on Big Pine Key, Florida, USA.		This nearly wingless katydid is only found in pine woods on Big Pine Key, Florida, USA (T.J. Walker in Deyrup & Franz 1994). Big Pine Key is less than 25 square km in area and pine woods on it are threatened by development.			VU - Vulnerable		1	0	0	0	0	0	0	0	1	0	0	0		1	0	Will Harlan
108203	Siphlonisca aerodromia	Tomah Mayfly	Mayflies	G2G3	G2	2006-02-01	2006-02-01	US	N2N3	N2	2006-02-01	ME (S2), NY (S1), PA (SNR), LB (SU), NF (SNR), QC (SNR)	BC = 6 - 80	15 occurrences in Maine, 4 (all around same site) in New York, 1 each in Labrador and Quebec, but likely more. In a study of population genetics, Gibbs et al. (1998) found 6 populations in Maine (Upper and Lower Tomah Stream in St. Croix drainage, Macwahoc Stream and Passadumkeag River in Penobscot drainage, Upper and Lower Dead River in Kennebec drainage) form at least two demographically indepe…			FH = Decline of <30% to increase of 25%		HI = Increase of >10%		Habitat alteration and loss (dams especially) (Gibbs, 1993).		The hyperbole surrounding the uniqueness and rarity of this species has been well documented (McCafferty and Edmunds, 1997). The species is currently known from seven published occurrences (in Labrador, Maine, New York and Quebec) as documented in both historical and recent literature. There is one additional, unpublished population existing in New York. Part of the reason that the species may be…					1	0	0	0	0	0	1	0	1	0	0	0	6/2022: listed as endangered in NY and threatened in ME - which are really the only 2 states where it's found. May be threatened by solar & wind energy in wetlands; more info saved to Teams	1	0	Tamara Strobel
108206	Orconectes bisectus	Crittenden Crayfish	Crayfishes	G1	G1	2006-09-12	2010-05-19	US	N1	N1	2006-09-12	KY (S1)	A = 1 - 5	Several sites, but geographic area very small amounting to only a few occurrences. It has an extremely limited distribution in the lowe Ohio River drainage in that it occurs only in Ohio River tributaries in the eastern portion of Crittenden Co., Kentucky (Taylor and Schuster, 2004). Burr et al. (2004) cite only Camp and Crooked Creeks, direct tributaries of the Ohio River, in Crittenden Co., Ken…	D = 1000 - 2500 individuals	Rough estimate, could be "C"	U = Unknown		U = Unknown		This species inhabits a rural area where there are no known threats. However there is a possible threat posed by the introduction of species not native to this drainage such as Orconectes rusticus, which used to be commonly used as a bait species by fishermen. One introduction, or an expansion of the range of O. rusticus which is occurring in nearby areas, perhaps as close as 10 miles (T. Jones, …	8 - Invasive & other problematic species, genes & diseases; 8.2 - Problematic native species/diseases	This species has a highly restricted distribution and the introduction of Orconectes rusticus to Crooked Creek, or the expansion of its range which is known to be occurring across the region, could result in rapid population declines due to competition and potentially hybridization. Further survey work is recommended to elicit the extent to which O. rusticus is expanding into the Crooked Creek dr…			VU - Vulnerable	Endangered	0	0	0	0	0	1	0	0	1	0	0	0		1	0	Will Harlan
108231	Cambarus jonesi	Alabama Cave Crayfish	Crayfishes	G2	G2	2005-05-09	2009-07-01	US	N2	N2	2005-05-09	AL (S2)	B = 6 - 20	In the Cumberland Plateau it occurs only in tributaries of the Tennessee River eastward to the Sequatchie Valley in Alabama where it is uncommon (Bouchard, 1974). According to Buhay et al. (2007), this species is currently known from 12 caves in Alabama. Previous cave localities in Marshall Co. actually represent two distinct species, Cambarus speleocoopi and Cambarus laconensis (Buhay and Cranda…	DE = 1000 - 10,000 individuals	All populations composed of very few individuals; fecundity low (Buhay et al., 2007). Bouchard (1974) noted it uncommon in Tennessee River tributaries in Alabama.	E = Decline of 30-50%		E = Decline of 30-50%	It was previously recorded from 14 sites along the Highland Rim region of northern Alabama (6 counties on both sides of the Tennessee River) and is now known from 12 but decline in quality of cave habitat has been noted (Buhay et al., 2007).	Usual risks for troglobytes, especially in a region of intensive stream impoundment and modification. The species is found across an area with cities that are rapidly expanding (Decatur and Huntsville, Alabama urban areas).	1 - Residential & commercial development; 1.1 - Housing & urban areas; 7 - Natural system modifications; 7.2 - Dams & water management/use; 9 - Pollution; 9.1 - Domestic & urban waste water	This species is endemic to Alabama caves (extent <20,000 sq. km, occupied area <2000 sq. km). Although the range is wide (both sides of the Tennessee River) for a cave species, area of occupancy is low and number of extant occurrences is only about 12 in fragmented areas with some decline in cave habitat quality and recent extirpation at two sites.			VU - Vulnerable	Currently Stable	1	0	0	0	0	0	0	0	1	1	1	0	positive 90 day in 2011 --Maria Papadopoulos	1	0	Will Harlan
108242	Elimia chiltonensis	Prune Elimia	Freshwater Snails	G2	G2	2005-06-09	2008-12-18	US	N2	N2	2005-06-09	AL (S2)	B = 6 - 20	It was first described from Warsan Creek, near the Waxahatchee Creek junction, Chilton Co., Alabama, extending into Shelby Co. and in three of its tributaries, as well as Weguska Creek in Coosa Co. (Goodrich, 1941). This species is found in six different tributaries of the Coosa River (Bogan and Pierson, 1993), including Hatchet Creek, Shoal Creek, Waxahatchee Creek, Wogofka Creek, Chestnut Creek…	U = Unknown		FH = Decline of <30% to increase of 25%		G = Relatively Stable (<=10% change)	The species was always considered a local endemic, and appears to continue to occupy the same drainage and tributaries it did when it was described.	The Coosa River is heavily impacted by impoundments and suffers from water pollution and siltation.		This species is poorly known and is found in six different tributaries of the Coosa River in two Alabama counties. The species was always considered a local endemic (<500 square km occupied area), and appears to continue to occupy the same drainage and tributaries it did when it was described. The Coosa River is heavily impacted by impoundments and suffers from water pollution and siltation.					1	0	0	0	0	0	0	0	1	1	1	0	positive 90 day in 2011 --Maria Papadopoulos_x000D_ Has since been withdrawn on 6/8/2018 --Ben Newman	1	0	Will Harlan
108258	Monodella texana	a cave obligate crustacean	Other Crustaceans	G2G3	G2	2002-08-21	2002-08-21	US	N2N3	N2	2002-08-21	TX (S1)	A = 1 - 5	Really only sample points of one or two large EOs.	E = 2500 - 10,000 individuals						Water quality and aquifer level is critical.		Essentially only one EO; threats to aquifer are real and increasing with human population.					1	0	0	0	0	0	0	0	1	0	0	0		1	0	Krista Kemppinen
108266	Ophiogomphus susbehcha	St. Croix Snaketail	Dragonflies and Damselflies	G2	G2	2009-05-30	2009-05-30	US	N2	N2	2009-05-30	MN (S2), VA (S1), WI (S2)	A = 1 - 5	There are probably less than ten occurrences globally. Viable populations known are the St. Croix River of Wisconsin/Minnesota, and its tributary the Chippewa River.	E = 2500 - 10,000 individuals	Possibly 50 - 100 mi (80 - 160 km) of occurrences. Apparently a large river obligate.			F = Decline of 10-30%	Unimpounded streams with very high water quality continue to become degraded or destroyed; very few are protected. This is especially true of large rivers.	Impoundment related water level fluctuations, agricultural non-point pollution, and municipal wastes are potential threats.	7 - Natural system modifications; 7.2 - Dams & water management/use; 9 - Pollution; 9.3 - Agricultural & forestry effluents; 9.4 - Garbage & solid waste	Apparent rarity and susceptibility to water quality degradation.			LC - Least concern		1	0	0	0	0	0	0	0	1	0	0	0		1	0	Will Harlan
108336	Agarodes stannardi	Stannard's Agarodes Caddisfly	Caddisflies	G2	G2	2019-10-30	2019-10-30	US	N2N3	N2	2005-04-21	AL (S2), KY (S1S3), MS (S1S2), TN (S2S3)	B = 6 - 20	Only 14 occurrences are known with few individuals collected during any single collection event. However, additional populations are probably present in similar streams within the range extent.	U = Unknown		U = Unknown	Population trend studies for this species have not been conducted. Likely has decreased due to silviculture and land conversion for crops.	U = Unknown	Population trend studies for this species have not been conducted.	Extensive silviculture and agriculture that involves conversion of land, intense water consumption, and pesticide and herbicide use has likely eliminated and isolated populations, decreased overall range, and destroyed habitat.	2 - Agriculture & aquaculture; 5 - Biological resource use; 5.3 - Logging & wood harvesting; 7 - Natural system modifications; 7.2 - Dams & water management/use; 7.2.3 - Abstraction of surface water (agricultural use); 7.2.9 - Small Dams	Limited range extent, 14 known occurrences, few individuals documented. Known only from spring habitats and small streams. Extensive silviculture and crop agriculture in range.					1	0	0	0	1	0	0	0	1	0	0	0		1	0	Will Harlan
108402	Procambarus franzi	Orange Lake Cave Crayfish	Crayfishes	G1	G1	2007-08-08	2014-06-04	US	N1	N1	2007-08-08	FL (S1)	A = 1 - 5	Only three known sites, all in the vicinity of Orange Lake, Marion County, Florida, USA; these may be interconnected and act as one occurrence.	AC = 1 - 1000 individuals	In a study conducted by Hobbs and Lee (1976), 23 and 32 individuals were recorded on two consecutive days from the type locality cave, with far fewer (number not reported) from a second cave. All known populations are small, although when last checked there was a viable population in the last two rooms of the type locality cave (Franz et al., 1994).	U = Unknown		U = Unknown		Presumably sensitive to degradation of aquifers (pollution), alteration of detrital flow, and salt intrusion that may accompany excessive water withdrawal or sea level rise. Loss of bat colonies may affect the trophic structure of the caves. The type locality is located on the north side of a quarry (Hobbs and Lee, 1976). This activity could be causing water quality issues to the groundwater supp…	3 - Energy production & mining; 3.2 - Mining & quarrying; 9 - Pollution; 9.2 - Industrial & military effluents	A cave species with only three known occurrences, possibly interconnected and all with low population levels, in a very restricted range. The type locality is impacted by quarrying activities, which may threaten groundwater quality. The species' seemingly limited distribution at the type locality (one or two chambers) makes it sensitive to any threats that disturb these chambers. The cave is reli…			EN - Endangered	Endangered	1	0	0	0	1	0	0	0	1	1	1	0	positive 90 day in 2011 --Maria Papadopoulos	1	0	Will Harlan
108452	Hubbardia shoshonensis	Shoshone Cave Whipscorpion	Spiders and other Chelicerates	G1	G1	2021-01-19	2022-10-23	US	N1	N1	2002-08-21	CA (S1)	A = 1 - 5	Likely a single occurrence. Shanks (2006) indicates negative surveys of other caves suggest this species is adapted exclusively to the Shoshone Cave.	U = Unknown		G = Relatively Stable (<=10% change)	The long-term trend of this species was likely stable prior to ground water over drafting.	F = Decline of 10-30%	The short-term trend of this species is unknown but probably declining as a result of ground water table reductions and changes in cave pool characteristics.	Ground water extraction and its effect on pool levels and subsequent humidity in the cave is likely a threat to this species at least periodically. Excessive ground water extraction for urban and agricultural uses in the Mojave Desert is likely a threat to this species that is dependent on thermal springs for survival and occupancy of the cave.	7 - Natural system modifications; 7.2 - Dams & water management/use; 7.2.7 - Abstraction of ground water (agricultural use)	This species is likely a very narrow endemic found only in the Shoshone cave. It is impacted by ground water extraction.					1	0	0	0	1	0	0	0	1	0	0	0		1	0	Jeff Miller
108473	Pyrgulopsis thermalis	New Mexico Hot Springsnail	Freshwater Snails	G1	G1	1999-09-14	2018-10-22	US	N1	N1	1999-09-14	NM (S1)	A = 1 - 5	Known from only two separate populations associated with a series of spring-brook systems along the Gila River in the Gila National Forest in Grant County, New Mexico (Landye 1981, Taylor 1987; USFWS 2003).	AC = 1 - 1000 individuals	Fewer than three miles (4.8 km) stream length. Estimate fewer than 1,000 individuals.	U = Unknown	Due to recently being described and uncertainty concerning number of occurrences, long-term trends are unable to be determined.	G = Relatively Stable (<=10% change)		The primary and chronic threat for all spring obligate species is dewatering, which results from drought, underground pumping and especially surface diversion. One thermal spring is used for recreational bathing. Bathers have excavated a small pool. Further excavation could alter flows from the pool down a cliff where the snails now reside. Also, adding chemicals to "clean" the water for bathing …	6 - Human intrusions & disturbance; 6.1 - Recreational activities; 7 - Natural system modifications; 7.2 - Dams & water management/use; 9 - Pollution; 11 - Climate change & severe weather; 11.3 - Temperature extremes	The global geographically restricted distribution of this springsnail makes the species vulnerable to human caused or natural events that could eliminate the species.			CR		1	0	0	0	1	0	0	0	1	0	0	0	Krista Kemppinen: ranked as G1 by NatureServe in 2018. Other factors: drought	1	1	Krista Kemppinen
108476	Glyphyalinia pentadelphia	Pink Glyph	Terrestrial Snails	G1G3	G2	2018-12-15	2018-12-15	US	N2N3	N2	2002-10-08	GA (SNR), NC (S2), TN (S2)	C = 21 - 80	Dourson (2013) lists distribution within the Great Smoky Mountains National Park (all in Polk Co., Tennessee) as Cades Cove, White Oak Sinks, Sugarlands and Albright Grove.	U = Unknown		U = Unknown		AE = Decline of >30%	The species was not observed during surveys for a project study area in western North Carolina that included a portion of the Great Smoky Mountains National Park (GSMNP) in Swain County and a portion of the Appalachian National Scenic Trail (AT) in Swain and Graham counties (NPS, 2005).	Threats and impacts have not been assessed but it can be assumed that development could affect habitat.	1 - Residential & commercial development	Very little is known about the conservation status of this species. It ranges along a three state border but occurrences are uncommon with occupied habitat unknown. Threats and short term trend have not been assessed but there has been some historical decline. Recent surveys in suitable habitat did not locate this species.					1	0	0	0	0	0	0	1	1	0	0	0	data deficient / occurs mainly on federal lands - including GSMNP / likely affected by Tropical Storm Helene	1	1	Will Harlan
108526	Distocambarus devexus	Broad River Burrowing Crayfish	Crayfishes	G1	G1	1996-02-19	2009-07-01	US	N1	N1	1996-02-19	GA (S1)	A = 1 - 5	Savannah River basin in Elbert, Oglethorpe, and Wilkes counties, Georgia (Hobbs, 1989). A very experienced collector in an extensive multi-year program found only three (recently five) localities in the Piedmont Province in the Broad River system and nearby tributaries to the Savannah River (Skelton, 2010).	DE = 1000 - 10,000 individuals	Hobbs estimates largest colony at < 24 adults.			U = Unknown		Historically and currently stressed by impoundment of the Savannah River.	7 - Natural system modifications; 7.2 - Dams & water management/use	This species has a restricted range with five occurrences. More information is needed on threats and trends.			DD - Data deficient	Endangered	1	0	0	0	0	0	0	0	1	1	1	0	positive 90 day in 2011 --Maria Papadopoulos	1	0	Will Harlan
108560	Stenamma wheelerorum	an ant	Ants, Wasps, and Sawflies	G1?	G1	1999-01-29	1999-01-29	US	NNR	NNR		NV (S1)	A = 1 - 5	Known only from the type nest as of 27 Jan 1999.		Unknown.				Unknown.	Moderately threatened by recreational use.		Known only from the type nest as of 27 Jan 1999.					1	0	0	0	0	0	0	0	1	0	0	0		1	0	Krista Kemppinen
108569	Sonorella bradshaveana	Bradshaw Talussnail	Terrestrial Snails	G1	G1	2002-10-08	2020-09-15	US	N1	N1	2002-10-08	AZ (S1)	A = 1 - 5	Currently there are 3 records in the Bradshaw Mountains (North Pine Creek, Poland Creek and Muldoon Gulch).	U = Unknown		U = Unknown	Population trend is unknown.	U = Unknown	Population trend is unknown.	Ongoing destruction or disturbance of talus slopes is the major threat to this species and is caused by the following stressors (J. Sorensen, pers. comm. 2021):1. Erosion and in-filling of interstitial spaces of talus and boulder piles from post-wildfire flooding within those drainages or hillsides. This may reduce or degrade the quality of shelter for talussnails.2. Spread of invasive grasses or…	1 - Residential & commercial development; 8 - Invasive & other problematic species, genes & diseases; 8.1 - Invasive non-native/alien species/diseases; 11 - Climate change & severe weather; 11.1 - Habitat shifting & alteration	This species has an extremely limited range and is known from only three localities in the Bradshaw Mountains of Arizona. It is known to be threatened by the destruction and disturbance of their talus slope habitat. Trends are difficult to determine, as population data are not available for this species.					1	0	0	0	0	1	0	0	1	0	0	0	Krista Kemppinen. Other factors: fire. Only coded higher order threats.	0	1	Krista Kemppinen
108577	Monadenia infumata setosa	Trinity Bristlesnail	Terrestrial Snails	G2T2	T2	2002-10-08	2024-02-01	US	N2	N2	2002-10-08	CA (S2)	C = 21 - 80	This subspecies is known approximately 75 occurrences as of 2002, but the number of occurrences may be obscured by taxonomic uncertainty (CDFW 2020; Sullivan 2021).			U = Unknown	The historical range of this subspecies is unclear, as it was found at new locations in successive surveys over the years and taxonomic uncertainty have obscured the number of occurrences (CDFW 2020; Sullivan 2021).	U = Unknown	Data are insufficient to assess a short-term trend.	This subspecies is threatened by habitat loss and degradation by activities that alter moist microclimates, increase exposure, and remove litter cover, such as fire, logging, off-road vehicle recreation, and mining as well as climate change (CDFW 2020; Sullivan 2021).	3 - Energy production & mining; 3.2 - Mining & quarrying; 5 - Biological resource use; 5.3 - Logging & wood harvesting; 6 - Human intrusions & disturbance; 6.1 - Recreational activities; 7 - Natural system modifications; 7.1 - Fire & fire suppression; 7.1.1 - Increase in fire frequency/intensity; 11 - Climate change & severe weather; 11.1 - Habitat shifting & alteration	This species has a limited range, a moderate number of occurrences,and several threats, but population trends are unknown.			VU		1	0	0	0	0	0	1	1	1	0	0	0		1	0	Jeff Miller
108581	Pseudanophthalmus hadenoecus	Timber Ridge Cave Beetle	Ground Beetles	G1	G1	2002-08-21	2023-02-08	US	N1	N1	2002-08-21	WV (S1)	A = 1 - 5	There were two beetles found during the first visit in 1958 and one in 1962 in the same area a few hundred meters in from the cave entrance. There are two accessible entrances, however the "North Entrance" appears to be the main one and likely where they were found (Barr 1965).	U = Unknown		U = Unknown	Data are lacking with which to determine either a long-term or short-term trend. This species has only been found in 1958 (2 males) and 1962 (1 male).	U = Unknown	Data are lacking with which to determine either a long-term or short-term trend. This species has only been found in 1958 (2 males) and 1962 (1 male).	In November 1985 there was an extreme flooding event where a significant volume of sediment (1800m3) was flushed through the cave at a very fast rate, scouring the cave sediment nearly to the ceiling. This was an unusual extreme happening. That there is the potential for this event to occur again in the future is the main known threat.This cave has a stream running through it and with that comes …	9 - Pollution; 9.1 - Domestic & urban waste water; 9.1.3 - Type unknown/unrecorded; 9.2 - Industrial & military effluents; 9.2.3 - Type unknown/unrecorded; 9.3 - Agricultural & forestry effluents; 11 - Climate change & severe weather; 11.4 - Storms & flooding	This cryptic species has only been located twice in one cave in very small numbers. There are threats, a few of which could be serious.					1	0	0	0	0	0	0	1	1	0	0	0		1	0	Will Harlan
108582	Peltotrupes youngi	Ocala Deepdigger Scarab Beetle	Other Beetles	G2	G2	2020-12-17	2020-12-17	US	N2	N2	2020-12-17	FL (S2)	B = 6 - 20	There are 15 Florida Natural Areas Inventory occurrences with ID confirmed and four more that are likely this species.	U = Unknown	Even if population size were known, it would likely not be meaningful in calculating a conservation status, as a large number of individuals might indicate a sense of security that is not warranted.	DE = Decline of 30-70%	Much of the sandhill and scrub habitats in Florida were destroyed historically due to agriculture and development (Kautz 1993, Kautz 1998, Turner et al 2006).	U = Unknown	There are too few recent records to estimate a short term trend.	While it is likely that this species was historically affected by habitat destruction due do agriculture and development, most occurrences are on managed areas and this does not appear to be a significant current threat. Collecting specimens for survey or research purposes is not likely to adversely affect populations.	1 - Residential & commercial development; 11 - Climate change & severe weather; 11.1 - Habitat shifting & alteration	This species only occurs in scrub and sandhill habitats with deep well-drained sand and only in a very small geographical area--Clay, Marion and Putnam counties in Florida, USA.			NE		1	0	0	0	0	0	0	0	1	0	0	0		1	0	Will Harlan
110050	Driloleirus americanus	Giant Palouse Earthworm	Worms, Leeches, and other Annelids	G1	G1	2006-02-06	2006-02-06	US	N1	N1	2006-02-06	ID (SNR), WA (S2)	A = 1 - 5	First discovered in Washington in 1897 but, until recently, not seen since 1988 (near Moscow Mountain). Recently (2006) collected from Washington State University Smoot Hill Ecological Preserve near Palouse, Washington (various newspapers incl. Spokesman-Review 2/1/2006). Four sites are in Clarkston/Pullman/Moscow area. Habitat that appears appropriate occupies only a small part of the range.		The population appears to be very low. One individual has been found in the past 20 years.					The Palouse prairies are considered to be the rarest ecosystem in Washington with the biggest threat to these worms being habitat destruction (since the late 1800s) due to agriculture and development. A secondary threat is the introduction of the now widespread European earthworm.	2 - Agriculture & aquaculture; 2.1 - Annual & perennial non-timber crops; 4 - Transportation & service corridors	Rare in the Palouse bunchgrass prairies of Washington and northern Idaho. No new collections (previous 1988) except one in Palouse, Washington in 2006 and 4 reported by WA NHP.			VU - Vulnerable		1	0	0	0	0	1	0	0	1	1	1	0	Negative 12 month in 2011, but still appears quite imperiled.	1	0	Noah Greewald
108643	Ochlodes yuma lutea	Great Basin Yuma Skipper	Butterflies and Skippers	G4T2T3	T2	2023-11-27	2023-11-27	US	NNR	NNR		NV (S2)	AB = 1 - 20	There are approximately at least 5-6 known occurrences of this subspecies (GBIF 2023; SCAN 2023; BLM 2023).			U = Unknown	There are too few records to estimate a population trend (SCAN 2023; GBIF 2023), but this subspecies likely experienced a long-term decline due to the destruction and draining of wetlands.	U = Unknown	There are too few records during the appropriate time period (2013-2023) to estimate a short-term population trend (SCAN 2023; GBIF 2023).	There is little information about this subspecies specifically, but the nominate species is threatened by warming and precipitation changes due to climate change in the range of this subspecies (Forister et al. 2021; Forister et al. 2023). This subspecies is also threatened by the loss of its host plant due to displacement by the invasive Eurasian common reed (Meyerson et al. 2010).	8 - Invasive & other problematic species, genes & diseases; 8.1 - Invasive non-native/alien species/diseases; 8.1.2 - Named species; 11 - Climate change & severe weather; 11.1 - Habitat shifting & alteration	This subspecies has a limited distribution, few known occurrences, threats from climate change and loss of host plants, and a likely long-term loss in habitat.					1	0	0	0	0	1	0	1	1	0	0	0		1	0	Noah Greewald
108660	Halocaridina palahemo	an anchialine pool shrimp	Other Crustaceans	G1	G1	1990-08-07	2006-06-05	US	N1	N1	2005-11-21	HI (S1)	A = 1 - 5	This species is only known from a lava tube at Ka Lae, Lua o Palahemo, and Island of Hawaii (Kensley, 1986).	FH = 10,000 to >1,000,000 individuals	> 10,000 INDIVIDUALS, BUT IN A SINGLE POND					Invasion, with human assistance, of anchialine pools by alien fish and crustaceans is an imminent, ever-present, threat and is the single most important impact to anchialine pool shrimp and their habitat. This can occur through human intervention (introducing marine fish, aquarium dumping, bait buckets, etc.) and has been known to occur in anchialine pools in Hawaii. Maciolek (1986) reported no a…		This species is only known from a lava tube at Ka Lae, Lua o Palahemo, and Island of Hawaii (Kensley, 1986).					1	0	0	0	0	1	0	0	1	0	0	0		1	0	Noah Greewald
108680	Cambarus strigosus	Lean Crayfish	Crayfishes	G2	G2	1996-02-19	2010-05-12	US	N2	N2	1996-02-19	GA (S2)	B = 6 - 20	Currently it is known from only 10 (perhaps a few more) localities in the Broad and Little River systems of the Savannah River drainage in northeast Georgia, in Wilks, Oglethorpe and Elbert Cos. (GA DNR, pers. comm., 2009).	U = Unknown	There is insufficient population data available for this species.	U = Unknown		U = Unknown		It is unknown whether there are any major threats impacting upon Cambarus strigosus.		This species has a restricted range in a few Georgia counties (range extent <1000 sq. km), and is known from few occurrences (possibly <10 but perhaps more). Information on population size and abundance are lacking. Threat and trend information is also lacking.			DD - Data deficient	Threatened	0	0	0	0	0	0	0	0	1	1	1	0	positive 90 day in 2011 --Maria Papadopoulos	1	0	Will Harlan
108682	Erora laeta	Early Hairstreak	Butterflies and Skippers	G2G3	G2	2020-03-28	2020-03-28	US	N3N4	N3	2001-03-28	GA (S1S2), KY (S1), MA (S2), MD (S1), ME (S4?), MI (S1), NC (S2S3), NH (SU), NJ (SNR), NY (S4), OH (SNR), PA (S1S2), TN (S2), VA (S2), VT (S2), WI (SU), WV (S2), NB (S1), NS (S1), ON (S2), PE (SH), QC (S4)	C = 21 - 80	Less than 100 occurrences found so far and many are historical, but new ones turn up every few years. Know from approximately 50 unique localities with records from 1990-2019 (SCAN 2020). A difficult species to find. It is difficult to decide in some cases whether single specimens really represent occurrences in the area, or are just strays, especially those not found in typical habitats.	U = Unknown	Seldom found in quantity, but females occasionally are, often on very hot mornings. Obviously an extant species could not be as rare as scarce as observations would suggest this one to be. Most observations southward are 1-5 adults. The main explanation is adults are mostly in the canopy. There is one locality in Kentucky where this butterfly has been found in numbers and it occasionally has at s…	DE = Decline of 30-70%	Beech, the foodplant, has been declining in Eastern North American forests for over a century due to the beech bark disease (Cale et al. 2017), likely causing a similar decline in this butterfly.	F = Decline of 10-30%	This species is obviously loosing habitat now due to beech blight and likely declining. Records from the period 2010-2019 are scattered across the range, with the species not being recorded every year in every state (SCAN 2020). Has not been recorded in Maine, formerly a large portion of the range, in over 60 years.	The demise of beeches due to beech bark disease (caused by the fungus Neonectria sp., which invades trees after damage by scale insects) in northern New England and adjacent areas now seems like a serious threat affecting a substantial part of the range, and possibly almost the entire species if beech nuts prove to be the major foodplant range-wide. A plausible worst case scenario would be extinc…	8 - Invasive & other problematic species, genes & diseases; 8.2 - Problematic native species/diseases	This species is rare and local over a broad range, and highly threatened by the loss of its foodplant to disease. Notably threats are known to be very serious where beech is the foodplant, which is likely almost range-wide. Deer loom as an impending catastrophic threat in the next decade or two in many places where Corylus is the main foodplant. The Early Hairstreak is easily overlooked since adu…					1	0	0	0	0	1	0	0	1	0	0	0		1	0	Noah Greewald
108690	Elliptio mcmichaeli	Fluted Elephantear	Freshwater Mussels	G2G3	G2	2014-01-09	2014-01-09	US	N3	N3	2000-08-30	AL (S2), FL (S1S2)	AC = 1 - 80	Blalock-Herod et al. (2005) listed this species in the Choctawhatchee River drainage from 29 historic sites (relocated in 15 of 20 surveyed) and found 51 new sites in both Florida and Alabama. Historically it was known from seven sites in the Pea River (a Choctawhatchee River tributary), and in a recent survey was found at three historic sites as well as one new one (Blalock et al., 1998). It was…	EF = 2500 - 100,000 individuals	Current surveys indicate that Elliptio mcmichaeli populations are patchy in distribution (Blalock et al., 1998). However, the species can be locally abundant. At the best site known, approximately 90 specimens/hr can be found. Densities at sites on the mainstem Choctawhatchee River in Alabama are approximately 20 per square meter. In a 2004 survey of 24 sites in the Choctawhatchee, Yellow, and Co…	EH = Decline of <50% to increase of <25%		F = Decline of 10-30%	Although this species can still be found in large numbers at several sites, recent surveys suggest it no longer occurs at multiple, historic sites (Blalock et al., 1998). Range has been reduced in Alabama despite discovery of several new localities (Blalock-Herod et al., 2005). It is still extant in much of the Choctawhatchee River drainage, with the exception of the Pea River system upstream of …	The population at highway US-90 has declined sharply for unknown reasons. Excessive sedimentation as a result of poor land management practices, chemicals from industrial runoff, reservoirs, and bank and streambed destabilization are potential threats. Due to human population growth in the Choctawhatchee River drainage, various federal agencies have suggested more than 25 potential locations for …	7 - Natural system modifications; 7.2 - Dams & water management/use; 9 - Pollution; 9.2 - Industrial & military effluents	This species is endemic to two river systems (assuming Escambia River system specimens represent this species as believed). Recent surveys indicate a minor range reduction (possibly 10% or more) compared to historical distribution, as well as imminent threats, although new populations have recently been discovered and several occurrences maintain large populations.			NT - Near threatened	Special Concern	1	0	0	0	0	0	0	0	1	0	0	0		1	0	Will Harlan
108730	Paravitrea mira	Funnel Supercoil	Terrestrial Snails	G1G2	G1	2019-12-16	2019-12-16	US	N1N2	N1	2002-10-08	KY (S1), VA (S2)	B = 6 - 20	The species was originally described from a ravine southwest of Council in Buchanan Co., Virginia (Hubricht 1975). Currently, it is known only from abutting sections of three counties in western Virginia: Buchanan, Dickenson and Russell Cos., Virginia (Hotopp et al. 2013) in very few locations and in Pike County, Kentucky (Dourson 2010).	U = Unknown		U = Unknown		U = Unknown		Threats have not been assessed for this species. Generally speaking, land snails are one of the most threatened and understudied organisms in North America (Lydeard et al. 2004). Humans have proven to be excellent dispersers for low mobility organisms like land snails (Cowie and Robinson 2003). Over the decades, snails have been deliberately and accidently introduced through numerous pathways. In…	Unknown/undetermined	Paravitrea mira is known only from a very small region the Appalachian Mountains of extreme western Virginia and neighboring eastern Kentucky. Very few locations are known and threat and trend information are lacking. Localities have been poorly surveyed and are not adequately protected. The species has a very limited range (250-1000 sq km) but number of occurrences, although less than 20, is not…					1	0	0	0	0	0	0	0	1	0	0	0	data deficient but likely needing protection due to industrial mining in these counties	1	0	Will Harlan
108734	Valvata perdepressa	Purplecap Valvata	Freshwater Snails	G2G3	G2	2015-03-30	2015-03-30	US	N3	N3	2003-06-19	IL (SNR), MI (SNR), WI (SU), NS (SNR), ON (S1?)	C = 21 - 80	This species is represented by a few occurrences (subpopulations), probably between 21 and 80. There are eight subpopulations recorded from Michigan, although none have been re-verified (MNFI 2007).		The total population size is unknown. It is a deep water species and does not show up in great numbers in surveys.			EF = Decline of 10-50%	Trend over the past 10 years is not precisely known, but populations in the Great Lakes have been impacted by zebra mussels.	Threats are not well known, but some subpopulations have been reduced or eliminated by zebra mussels (E. Pip. pers.comm. to D. Lepitzki 2014).	8 - Invasive & other problematic species, genes & diseases; 8.1 - Invasive non-native/alien species/diseases; 8.1.2 - Named species	This species has a restricted distribution and some populations have been impacted by zebra mussels.					0	0	0	0	0	1	0	0	1	0	0	0		1	0	Noah Greewald
108750	Megomphix lutarius	Umatilla Megomphix	Terrestrial Snails	G1G2	G1	2022-03-04	2022-03-04	US	N1	N1	2002-10-08	OR (S1S2), WA (SH)	AB = 1 - 20	Frest and Johannes (1995c) report this species as originally described from two widely separated sites in the Blue Mountains, Walla Walla Co., Washington and Umatilla Co., Oregon but were unable to locate it in a number of sites in the Blue Mountains between 1991-1994, including at the type locality. Surveys in 2012 and 2016 located extant records in Umatilla and Union Counties, Oregon (Jespsen e…	U = Unknown		U = Unknown	Long term trends largely unknown, but presumed to be a decline because the species no longer occurs at sites from which it was originally described (Frest and Johannes 1995c, Jepsen et al. 2011).	U = Unknown	This species was believed extirpated (repeated surveys had not found it since it was originally described in the 1930s) until located at a new site in 2012 ( Frest and Johannes 1995c, Jepsen et al. 2011, 2012). Trends are not known.	This species relies on moist, shady, stable microclimates. Activities such as grazing, logging, road construction, fire suppression, or droughts that remove or compact woody debris, riparian corridors, ground cover, or talus can negatively alter the temperature and humidity of this snail's microhabitat and therefore constitute threats (Frest and Johannes 1995c, Blackburn et al. 2021). Logging, an…	2 - Agriculture & aquaculture; 2.3 - Livestock farming & ranching; 2.3.2 - Small-holder grazing, ranching or farming; 4 - Transportation & service corridors; 4.1 - Roads & railroads; 5 - Biological resource use; 5.3 - Logging & wood harvesting; 7 - Natural system modifications; 7.1 - Fire & fire suppression; 7.1.1 - Increase in fire frequency/intensity; 11 - Climate change & severe weather; 11.2 …	Known from only two-three extant sites in Oregon. Surveys by qualified biologists at historical (1930's) sites in Oregon and Washington have not found this species. This species is threatened by logging, grazing, road maintenance and development, changed fire regimes, and drought. These threats alter the species' cool, moist microclimate.					1	0	0	0	1	0	0	0	1	0	0	0		1	0	Noah Greewald
108773	Partulina nattii	an achatinellid land snail	Terrestrial Snails	G1	G1	1990-08-07	1990-08-07	US	N1	N1	2003-06-18	HI (S1)	A = 1 - 5	TWO POST-1945 RECORDS (1982 & 1983).	AC = 1 - 1000 individuals	NO POPULATION SIZE KNOWN. ESTIMATED DENSITY OF ONE OF TWO POPULATIONS WAS 1 ADULT & 3 JUVENILES PER TREE.					THREATENED BY INTRODUCED PREDATORS (RATS) AND BY THE SPREADING EUGLANDINA.		G1S1.1. TWO RECENT POPULATION FROM HONOMANU.			DD - Data deficient		0	0	0	0	1	1	0	0	1	0	0	0		1	0	Noah Greewald
108819	Orthotrichia dentata	Dentate Orthotrichian Microcaddisfly	Caddisflies	G2G3	G2	2005-03-10	2009-03-06	US	N2N3	N2	2005-04-29	FL (S1S2), MS (SNR), NC (SNR), SC (SNR)	B = 6 - 20	It is known from a few locations; one in Florida from 1957 in Temple Terrace (Hillsborough County probably near Hillsborough River), four recent in Florida including the Rainbow River, St. Johns River (lower), St. Andrews Bay, and Withcaloochee River (south) in Clay, Escambia, Marion, and Washington Cos. (Rasmussen et al., 2008), one in Mississippi (Hancock County- see Harris et al., 1982), and t…	AC = 1 - 1000 individuals	Only known populations are small and widely scattered.	FH = Decline of <30% to increase of 25%		G = Relatively Stable (<=10% change)	Although the Hillsborough County site could not be relocated, four new sites have been found in Florida (Rasmussen et al., 2008).	Threats include pollution, siltation, and other forms of environmental degradation.		Only a few known occurrences exist that are widely disjunct (including four new occurrences widely separated in Florida), but others may exist.					1	0	0	0	0	0	0	0	1	0	0	0	Not much data about this species, but springs appear to be critical habitat in Florida where most of its known sites are located	1	0	Will Harlan
108867	Aphaostracon chalarogyrus	Freemouth Hydrobe Snail	Freshwater Snails	G1	G1	1999-09-14	2019-09-27	US	N1	N1	1999-09-14	FL (S1)	A = 1 - 5	Only one occurrence is known, at the pool and overflow pool of Magnesia Springs, Alachua County, Florida (Burgess and Franz 1978, Johnson 1973, Thompson 1999)	U = Unknown	There are no population estimates and this would not likely be a relevant factor, as there could be many of these tiny snails in a very small area, which would give an unwarranted sense of security for this species.	U = Unknown	Known from very few specimens	U = Unknown	No recent records	Listed in a table of "Springs with Intermittent or Permanent Flow Cessation" (Knight and Vick 2018), but no information is available as far as frequency, duration, or its effect on this species, if any.	7 - Natural system modifications; 7.2 - Dams & water management/use	This species is endemic to Florida, with only one known occurrence in a spring run on private property. Species that have small ranges and narrow habitat specializations have a greater chance of extinction than similar species with larger ranges and/or that are not habitat specialists (Chichorro et al. 2019). There are no records more recent than 1975, but there is no evidence of subsequent surve…			VU		0	0	0	0	0	0	0	0	1	1	1	0	Petition withdrawn	1	0	Will Harlan
108870	Melanoplus digitifer	a spur-throat grasshopper	Grasshoppers	G2G3	G2	2000-12-01	2013-06-27	US	N2N3	N2	2000-12-01	ID (S4), OR (SNR), BC (SNR)	U = Unknown				CE = Decline of 30-80%	Several of the Idaho sites were in the Palouse prairie section which is heavily agricultural, so much original habitat is now cropland.	CF = Decline of 10-80%	The lack of records from Idaho, a large portion of the total range, since 1961 does suggest some level of decline in recent decades, but it would be premature to consider the species historic there. The species appears to be stable in British Columbia.	This species can probably persist with at least low to moderate grazing, although there are no known observations. Very serious threats associated with grazing include pest control and herbicide use. Grasshopper spraying is widespread in the West and often directed at this genus, there is no reason to suspect that effects would vary much between species. In addition to chemical insecticides, any …	2 - Agriculture & aquaculture; 2.3 - Livestock farming & ranching; 7 - Natural system modifications; 7.1 - Fire & fire suppression; 8 - Invasive & other problematic species, genes & diseases; 8.1 - Invasive non-native/alien species/diseases; 9 - Pollution; 11 - Climate change & severe weather; 11.1 - Habitat shifting & alteration; 11.2 - Droughts; 11.3 - Temperature extremes	The species is, or was, somewhat more widespread than was known in 2000 but most of the records are now more than 40 years old. The species has been found at about a dozen places historically, but undoubtedly occurred elsewhere. The original rank range of G2G3 still fits what is known, although with so many fields scored as unknown (=U), Rank Calculator gave G2G4. With several records from the Se…					1	0	0	0	0	0	0	1	1	0	0	0	Other factor is grasshopper control.	1	1	Noah Greewald
108883	Anomala eximia	Archbold Anomala Scarab Beetle	Other Beetles	G1G2	G1	2023-09-08	2023-09-08	US	N2	N2	2011-07-11	FL (S2)	B = 6 - 20	There are eight occurrences in the FNAI database as of September, 2023.	U = Unknown		CE = Decline of 30-80%	There is no direct evidence of a decline but approximately 85% of scrub habitat along the Lake Wales Ridge has been lost to development and agriculture in the last century (Turner et al. 2006).	U = Unknown	There are no records within the past ten years as of September, 2023.	Development was likely a past threat but all eight occurrences are on managed areas and no current and ongoing threats have been documented.	1 - Residential & commercial development	This species requires scrub habitat and is known from less than 10 occurrences along the Lake Wales Ridge, Florida, USA.			NE		1	0	0	0	0	0	0	0	1	0	0	0		1	0	Will Harlan
108909	Orconectes sheltae	Shelta Cave Crayfish	Crayfishes	G1	G1	2002-08-21	2010-05-19	US	N1	N1	2002-08-21	AL (S1)	A = 1 - 5	This species is known only from Shelta Cave (Tennessee River drainage), Madison Co., Alabama (Mirarchi et al., 2004; appendix 1.2, pub. separately; Schuster and Taylor, 2004; Schuster et al., 2008).	BC = 50 - 1000 individuals	J.E. & M.R. Cooper estimate population size 96-102 individuals, based on 942+ person-hrs of study in the cave (Cooper, 1975; Cooper and Cooper, 1997); prior to 1975 only 17 individuals had ever been collected and later 97 individuals were examined and released.	AC = Decline of >70%		AC = Decline of >70%	There has been an inferred decline in number of mature individuals as well as a decline in (Cooper and Cooper, 1997; Buhay and Crandall, 2008) as well as declines in abundance, due to the reduction in nutrient availability from Gray Bat guano since the bats have abandoned the cave (Buhay and Crandall, 2008).	This species is impacted by a variety of factors namely land development and vandalism, cave abandonment by Gray Bats, insecticides and water level fluctuations. In the 1960s there was extensive vandalism in the cave and the surrounding land was developed with residential housing (Cooper and Cooper, 1997). In 1967, the cave was purchased by the National Speleological Society which owns the entran…	1 - Residential & commercial development; 1.1 - Housing & urban areas; 6 - Human intrusions & disturbance; 6.1 - Recreational activities; 6.3 - Work & other activities; 9 - Pollution; 9.3 - Agricultural & forestry effluents; 11 - Climate change & severe weather; 11.2 - Droughts	Restricted to one cave; it is considered the "smallest and rarest member" of a particular subterranean crayfish triad with inferred severe decline in number of individuals. This species has an Area of Occupancy of 280 sq. m and occurs in only one cave. This cave specialist is likely to be sensitive to habitat alterations. It is inferred that Orconectes sheltae is experiencing declines in abundanc…			CR - Critically endangered	Endangered	1	0	0	0	1	0	0	0	1	1	1	0	positive 90 day in 2011 --Maria Papadopoulos	1	0	Will Harlan
108911	Speyeria adiaste	Unsilvered Fritillary	Butterflies and Skippers	G1G2	G1	1998-09-30	2020-03-29	US	N1N2	N1	1998-09-30	CA (SNR)	B = 6 - 20	There are approximately 12-15 extant occurrences (compiled in SCAN 2020). Note that metapopulations, not demes, are the appropriate unit for conservation and ranking.	U = Unknown	Not enough information to determine.	BD = Decline of 50-90%	Subspecies atossa is extinct possibly due to a combination of overgrazing and drought (Orsak 1974, Hammond and McCorkle 1983). Populations of subspecies adiaste have declined significantly.	F = Decline of 10-30%	The subspecies clemencei was documented to decline in Monterey County during 2011-2014 (Zaman et al. 2015). The species was recorded a few times annually during the period 2010-2019 (SCAN 2020).	Development, fire suppression, too extensive fires, alien weeds, and introduced thistle seed weevils all may be threats that require management plans. Subspecies clemencei occurs in the fire-prone Santa Lucia Range. Genus is reputed to be very susceptible to pesticides, but there is little evidence they are any more so than most butterflies. Species of this genus often depend on fire maintained h…	1 - Residential & commercial development; 7 - Natural system modifications; 7.1 - Fire & fire suppression; 8 - Invasive & other problematic species, genes & diseases; 8.1 - Invasive non-native/alien species/diseases	This species has a limited range in coastal California where it has undergone long-term declines. Scott (1986, citing Emmel) reports a significant decline as have others since, including Zaman et al. (2015). Subspecies atossa is extinct.					1	0	0	0	0	1	0	0	1	1	0	1	Krista Kemppinen: other factors: drought, fire suppression, too extensive fires	1	1	Krista Kemppinen
108944	Manophylax altus	Mount Mitchell Caddisfly	Caddisflies	G1	G1	2020-01-04	2020-01-04	US	N1	N1	2005-07-14	NC (S1), WV (SNR)	A = 1 - 5	Known from 2 occurrences in Buncombe and Yancey Counties in North Carolina. Morse et al. (1997) state "possibly near Cranberry Glades (823 m elevation), WV." The West Virginia record is unclear and therefore not included here. There are likely additional populations in the region but they are difficult to detect because immature stages are mostly terrestrial, clinging to moist vertical rock surfa…	U = Unknown		U = Unknown	Limited collection data are insufficient to estimate population trends.	U = Unknown	Limited collection data are insufficient to estimate population trends.	Limited information on the biology, ecology, and sensitivity of this species exists.	1 - Residential & commercial development; 1.3 - Tourism & recreation areas	Rank based on two known occurrences in North Carolina, state rank of S1, and infrequency of collection reports.					1	0	0	0	0	0	0	1	1	0	0	0	Trpical Storm Helene likely had significant impact on this species, which only occurs in Bubcombe and Yancey Counties where the storm's impacts were most severe	1	0	Will Harlan
108962	Udea dryadopa	'Ohenaupaka Oeobian Moth	Other Moths	G1G3	G2	1984-09-07	2004-03-31	US	NNR	NNR		HI (S1S3)	U = Unknown		U = Unknown		U = Unknown		U = Unknown		The usuals, habitat oblitaration, pervasive alien weeds and feral ungulates, and probably also to some extent biocontrol species such as parasitic wasps.		This species was not found on Bishop Museum/Hawaii Biological Survey Website lists visited in March 2004. The extinct species list presumably reflects up to date information, so this species is apparently extant. It is also not now an active USFWS candidate species according to that Website, but this fact is difficult to interpret and certainly is not by itself evidence the species is secure. Inf…					1	0	0	0	0	1	0	0	1	0	0	0	Very limited information.	1	0	Noah Greewald
108971	Partulina radiata	an achatinellid land snail	Terrestrial Snails	G1	G1	2007-06-25	2007-06-25	US	N1	N1	2007-06-25	HI (S1?)	A = 1 - 5	1 POST-1945 RECORD (1982) (as Partulina gouldi, a synonym).	AC = 1 - 1000 individuals	NO ESTIMATE OF POPULATION SIZE, BUT COLONY LOCALITY APPEARS TO BE HIGHLY RESTRICTED. ONLY FOUND ON THREE TREES (as Partulina gouldi, a synonym).	U = Unknown		U = Unknown		THREATENED BY PREDATORS (EUGLANDINA, RATS, OXYCHILUS), HABITAT DESTRUCTION AND OVERCOLLECTING.		Although historically known from Maui, only 1 population has been reported since 1945 and the status of that population is not known.					1	1	1	0	1	0	0	0	1	0	0	0	Very limited information.	1	0	Noah Greewald
108980	Acroneuria hitchcocki	Kentucky Stone	Stoneflies	G1G2	G1	2009-09-17	2009-09-17	US	N1N2	N1	2009-09-17	IN (SNR), KY (S1S2)	A = 1 - 5	Currently, known from a single stream in the Daniel Boone National Forest, Rowan Co., Kentucky (Stark, 2004). Kentucky localities include Rowan Co. (Tarter et al., 2006).	U = Unknown						Many surrounding streams have been severely impacted by agriculture and other poor land management practices.		Currently, known from a single stream in the Daniel Boone National Forest, Rowan Co., Kentucky. Many surrounding streams have been severely impacted by agriculture and other poor land management practices.					1	0	0	0	0	0	0	0	1	0	0	0		1	0	Will Harlan
109028	Protoptila balmorhea	Balmorhea Saddle-case Caddisfly	Caddisflies	G1	G1	2017-12-11	2017-12-11	US	N2	N2	2005-03-30	AZ (S1), TX (S1)	AB = 1 - 20	This species is known from only 4 occurrences: 1 in Reeves County, Texas and 3 in Yavapai County (Moulton et al., 1994).					U = Unknown	No information on population trend is available.	The 3 Arizona occurrences could possibly be considered a single occurrence because they are from the same stream within 0.5 km of each other, making this species known from only 2 occurrences. This stream is subject to considerable disturbance due to human activity on nature trails, developement of hot spring pools, and other tourist attractions.	6 - Human intrusions & disturbance; 6.1 - Recreational activities	This species was assigned a rank of S1 in Texas. It is known from only 4 occurrences, 3 of which are within 1 km of each other. The 4th known occurrence is 800 km away. However; given this large Range Extent, additional occurrences may be present in other states and northern Mexico where larval habitat requirements are met (Moulton et al. 1994). Future confirmation of additional occurrences could…					1	0	0	0	0	0	0	0	1	0	0	0		1	0	Krista Kemppinen
109040	Pyrgulopsis carinata	Carinate Duckwater Pyrg	Freshwater Snails	G1	G1	2009-05-05	2009-05-05	US	N1	N1	2009-05-05	NV (S1)					U = Unknown	2012: Long term monitoring and survey work should be performed to track the persistence of this taxon.	U = Unknown	2012: Element has been found in two separate years (2007 and 2009). Recent restoration activities of Little Warm Spring may have contributed to habitat conditions that increased this taxons abundance allowing for its re-discovery.	2012: Alterations at source spring and its hydrology should be protected.		2009: This taxon was found in 2007 (Sada) and again in 2009 where is was collected, it occurs only in approximately 20 m of outflow habitat (Sada, e-mail 2011). 2006:During two recent visits to this spring, the species could not be found (although P. papillata is still present), and it is likely extinct (Hershler 1998). D. Sada (personal communication, April 2006) noted that this species "has not…					1	0	0	0	0	0	0	0	1	0	0	0		1	0	Krista Kemppinen
109052	Appalachia arcana	Michigan Bog Grasshopper	Grasshoppers	G2G3	G2	2000-12-01	2018-12-11	US	N2N3	N2	2000-12-01	MI (S2)	C = 21 - 80	There are 69 occurrences in NatureServe for this species and 44 that have been documented within the past 20 years, although with no occurrences being ranked as extirpated . Ballard (1989) identified 22 sites, that were apparently still extant. There are likely more sites that were not accessible during his 1989 survey. A recent survey of Camp Grayling Military Reservation, Grayling, MI, identifi…			FH = Decline of <30% to increase of 25%	Total range based on recently documented occurrences is approximately 2/3 of total historic range, but whether the historical occurrences are still extant is unknown.	U = Unknown	There is too little known about the species to accurately estimate trends, but since the typical habitat, particularly jack pine, is subject to exploitation, populations would be expected to be declining.	The secretive locust is closely tied to jack pine in and directly around leatherleaf bogs, northern wet prairies, and intermittent wetlands. This association makes any land-use practice that degrades this habitat a potential threat to the grasshopper, although there are no data to quantify this or other threats. Harvest of jack pine from habitats of this sort may be harmful since it is unclear wh…	5 - Biological resource use; 5.3 - Logging & wood harvesting; 7 - Natural system modifications; 7.1 - Fire & fire suppression; 7.2 - Dams & water management/use	This flightless grasshopper has a limited geographic distribution in Michigan and has somewhat specific habitat requirements.			VU		1	0	0	0	0	0	0	0	1	0	0	0		1	0	Noah Greewald
109069	Anisota manitobensis	Manitoba Oakworm Moth	Giant Silkworm and Royal Moths	G2Q	G2	2017-08-24	2017-08-24	US	NH	NH	2002-07-16	MN (SH), ND (SH), MB (S2)	AC = 1 - 80	Probably very few. See Henne (2002) for known current sites.	U = Unknown	Probably fluctutes through one to three orders of magnitude in most places, as A. senatoria does in much of its range.	AC = Decline of >70%	Has apparently greatly declined since the 1970s, with apparntly no collections in the 1980s through about 1995.	U = Unknown		Habitat loss and fragmentation and probably COMPSILURA CONCINNATA (Diptera: Tachinidae) an introduced out of control biocontrol. This one, and some other species of ANISOTA, have an outbreak/crash ecology. Crashes in fragmented scraps of habitat could easily lead to local extirpation which could add up to rather rapid extinction--especially if the above highly potent parasitoid becomes establishe…		With annual effort from 1989-1996 Henne (2002) found this species only twice, both times as single larval clusters about 2 km apart near Fullers Manitoba in August, 1996. Henne summarizes most, if not all, known valid records There has been severe habitat fragmentation in the Canadian range, and as Henne suggests, local extirpations have probably occurred on a large scale. This species has/had an…					1	0	0	0	0	1	0	0	1	0	0	0		1	0	Noah Greewald
109085	Atrytonopsis quinteri	Crystal Skipper	Butterflies and Skippers	G1	G1	2004-04-27	2023-10-25	US	N1?	N1	2001-05-07	NC (S1)	B = 6 - 20	This species is known from approximately 7 occurrences using a 1 km separation distance and records from 2007-2023 (iNaturalist 2023; SCAN 2023; GBIF 2023).		Described as locally abundant (Burns 2015).	DE = Decline of 30-70%	Populations of this species have declined, as substantial portions of its habitat and potential habitat have been developed (Burns 2015; North Carolina Natural Heritage Program 2021).	U = Unknown	There are too few records during the appropriate time period (2013-2023) to be able to estimate a short-term population trend (SCAN 2023; GBIF 2023; iNaturalist 2023).	This species habitat on coastal dunes and barrier islands has been destroyed due to coastal development and is threatened by increasing storms and flooding due to climate change (Burns 2015; North Carolina Natural Heritage Program 2021).	1 - Residential & commercial development; 1.1 - Housing & urban areas; 11 - Climate change & severe weather; 11.4 - Storms & flooding	This species is imperiled due to its limited distribution and number of occurrences, its long-term habitat loss and corresponding population declines, and continued threats in its narrow range.					1	0	0	0	1	0	0	1	1	0	0	0	Only from two primary locations in coastal NC - one is state park and other is threatened with development	1	0	Will Harlan
109094	Argia sabino	Sabino Dancer	Dragonflies and Damselflies	G2	G2	2012-05-17	2012-05-17	US	N2	N2	2012-05-17	AZ (S2)	B = 6 - 20	populations from 4 mountain ranges in Arizona and also Yacura Mexico.	CD = 250 - 2500 individuals	Apparently fluctuates. C seems more likely.	DE = Decline of 30-70%	At least one populationhas been excluded from portions of its habitat by exotic crayfish and other undocumented losses are quite likely.	G = Relatively Stable (<=10% change)	Has lost substantial habitat at one site due to exotic crayfish but may be stable in higher altitudes	Streams might go dry or be impacted by a tropical storm, etc. It is unclear how serious the ecological sink effect resulting from continued oviposition in formerly suitable downstream habitat is. It is unclear whether habitats at at one U.S. canyon site or in Mexico are all similarly affected by exotic crayfish. However this exotic has impacted at least one of the two US occurrences.	8 - Invasive & other problematic species, genes & diseases; 8.1 - Invasive non-native/alien species/diseases; 11 - Climate change & severe weather; 11.4 - Storms & flooding	Small range in 4 mountain ranges in Arizona, and at least one in Mexico. Habitats are streams in isolated canyons in arid areas. Substantial habitat has apparently been rendered useless, probably permanently, by exotic crayfish at the best known site and this probably has also happened, or soon will, rangewide. Besides a reduction of total habitat, this will probably confine A. SABINO to a narrow…			VU - Vulnerable		1	0	0	0	1	1	0	0	1	1	1	0	positive 90 day in 2009 --Maria Papadopoulos	1	0	Krista Kemppinen
109111	Procambarus capillatus	Capillaceous Crayfish	Crayfishes	G2	G2	2014-04-01	2014-04-01	US	N2	N2	2014-04-01	AL (S2), FL (S1)	AB = 1 - 20	In Alabama, it is known from only the Escambia River system (Mirarchi et al., 2004, appendix 1.2, pub. separately; Schuster and Taylor, 2004; Schuster et al., 2008).	DH = 1000 to >1,000,000 individuals		U = Unknown		U = Unknown		It is unknown whether this species is impacted by any major threats. However, it is likely to be undergoing localized declines due to urbanization, alterations to the hydrological regime and water pollution.	1 - Residential & commercial development; 1.1 - Housing & urban areas; 7 - Natural system modifications; 7.2 - Dams & water management/use; 9 - Pollution; 9.1 - Domestic & urban waste water	Despite an abundance of potential habitat and lack of evidence of substantial threats, the range of the species is restricted to only a single small drainage (Escambia River system) in adjacent southern Alabama and western Florida (Hobbs, 1989).			DD - Data deficient	Vulnerable	1	0	0	0	0	0	1	0	1	0	0	0		1	0	Will Harlan
109138	Partulina ustulata	an achatinellid land snail	Terrestrial Snails	G1	G1	1990-08-07	1990-08-07	US	N1	N1	2003-06-18	HI (S1)	A = 1 - 5	1 POST-1945 RECORD (1982).	AC = 1 - 1000 individuals	NO ESTIMATE OF POPULATION SIZE.					THREATENED BY INTRODUCED PREDATORS (EUGLANDINA, RATS, OXYCHILUS), HABITAT DESTRUCTION AND OVERCOLLECTING.		G1S1.1. ONLY 1 POPULATION LAST REPORTED IN 1982 FROM WEST MAUI.			DD - Data deficient		1	1	0	0	1	1	0	0	1	0	0	0	Very limited information.	1	0	Noah Greewald
[truncated: 1,944 more rows]
